# Supplementary material for: Dissection of metabolic pathways in the Db/Db mouse model by integrative proteome and acetylome analysis
Source: Royal Society of Chemistry journal article supplement (doi:10.1039/c4mb00490f), 2014-12-24
Supplement: c4mb00490f1.pdf [file c4mb00490f1.pdf]

Supplementary Information:

Figure 1:

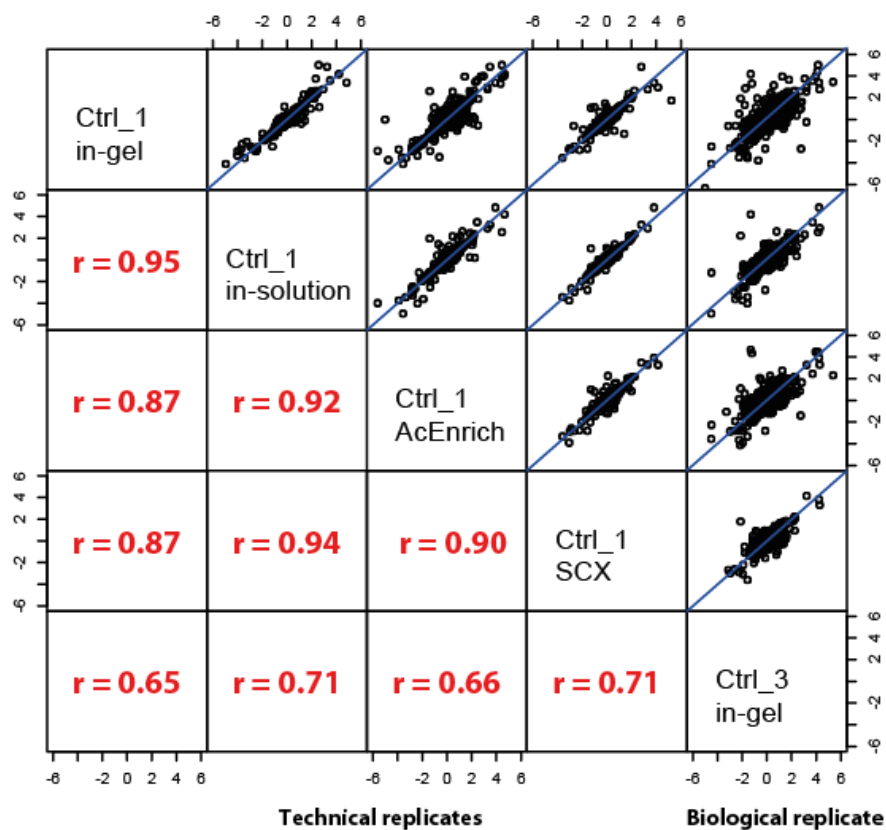

**Suppl. Fig. 1:** Correlation between technical replicates for proteome analysis using in-gel, in-solution, immunoprecipitation and SCX experimental procedure. Blue line shows linear regression of the data and the calculated Pearson correlation coefficient  $r$  for each pair of the technical replicate which is between 0.87 and 0.95. The comparison of the biological replicates of the direct Control/DbDb ratio for each experiment reveals a correlation between 0.65 and 0.71.

Figure 2:

**A**

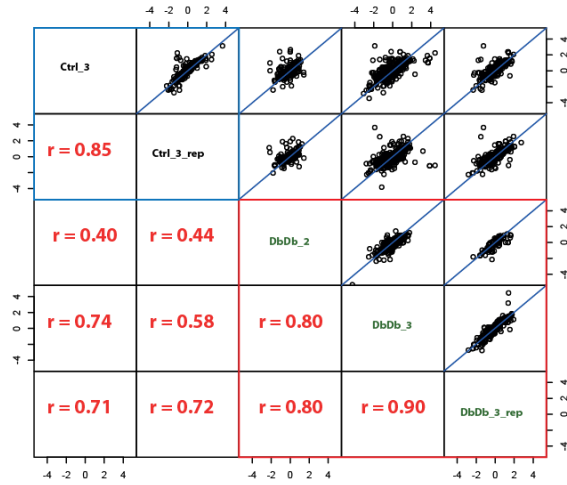

**B**

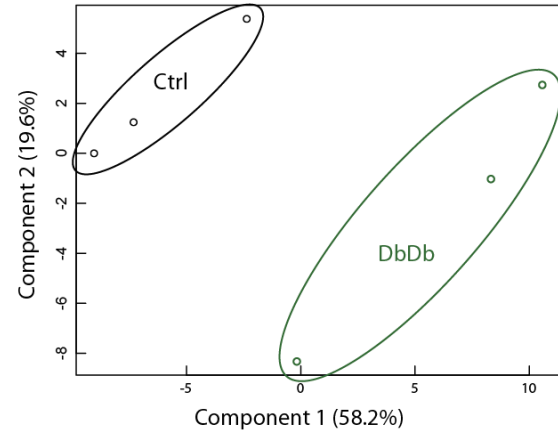

**Suppl. Fig. 2:** Experimental results of Acetyome (a) A total of 1604 lysine acetylation sites are quantified. Correlation between technical replicates showed an average Pearson correlation of 0.8 (b) Principle component analysis resulted in a clear separation of component 1 (58%) and component 2 (20%).
