# Supplementary material for: Dissection of metabolic pathways in the Db/Db mouse model by integrative proteome and acetylome analysis
Source: Royal Society of Chemistry journal article supplement (doi:10.1039/c4mb00490f), 2014-12-24
Supplement: c4mb00490f2.xlsx [file c4mb00490f2.xlsx]

## Sheet: Table 1 - Legend
Terms used as headers in Supplementary tables		Description
Proteins		Uniprot identifier
Positions within proteins		Position of the Acetyl Lysine in the protein
Leading proteins		The protein with the best match, this particular peptide is associated with
Protein names		Names of proteins this peptide is associated with
Gene names		Names of genes this peptide is associated with
Sequence window		The amino acid sequence +/- 6 residues around the modified site
Acetyl Ratio DbDb/Ctrl normalized		Ratio of acetylated peptide between DbDb and control mice normalized on protein ratio
Protein level		normalized Ratio of acetylated peptide between DbDb and control mice
Acetyl Ratio Heavy/control		Ratio of acetylated peptide between heavy SILAC liver standard and control mice
Acetyl Ratio Heavy/DbDb		Ratio of acetylated peptide between heavy SILAC liver standard and DbDb mice
Acetyl Ratio DbDb/Ctrl not normalized		Ratio of acetylated peptide between DbDb and control mice not normalized on protein ratio
Charge		The charge of the precursor ion
Multiplicity		The number of labeled acetylated lysines
GOBP name		GOBP annotation (mouse Uniprot)
GOMF name		GOMF annotation (mouse Uniprot)
GOCC name		GOCC annotation (mouse Uniprot)
KEGG name		KEGG annotation (mouse uniprot)
Localization prob		Positioning probabilities for Acetyl (K) ([0-1], where 1 is best match
PEP		Posterior Error Probability of the identification. This value essentially operates as a p-value, where smaller is better.
Score		The Andromeda score of the best identified modified peptide containing this site
Score for localization		The Andromeda score of the MS/MS spectrum used for calculating the localization score for this site
Mass error [ppm]		Mass error of the recalibrated mass-over-charge value of the precursor ion in comparison to the predicted monoisotopic mass of the identified peptide sequence
Intensity		Sum of intensities for all identified peptides
Protein IDs		ID of identified protein group
log2 Ratio DdDb		normalized log2 protein Ratio between DbDb and control mice
Pfam		Pfam annotation (mouse uniprot)
-log 10 p value		negative log 10 p value
log2 Ratio HFD/contrl		normalized log2 protein Ratio between HFD and control mice

## Sheet: Table 2 - DbDb Acetyl Data
Proteins	Positions within proteins	Leading proteins	Protein names	Gene names	Sequence window	Acetyl Ratio DbDb/Ctrl normalized	Siginificant_norm	Protein level	Acetyl Ratio Heavy/Ctrl	Acetyl Ratio Heavy/DbDb	Acetyl Ratio DbDb/Ctrl not normalized	Significant	Charge	Multiplicity	GOBP name	GOMF name	GOCC name	KEGG name	Localization prob	PEP	Score	Score for localization	Mass error [ppm]	Intensity
P26443	98	P26443	Glutamate dehydrogenase 1, mitochondrial	Glud1	DKLVEDLKTRESEEQKRNRVRGILRIIKPCN	NaN		0.259204	0.0776246	-0.181579	#DIV/0!		2	___1	amine metabolic process;behavior;biological regulation;carboxylic acid metabolic process;cellular amine metabolic process;cellular amino acid metabolic process;cellular ketone metabolic process;cellular metabolic process;cellular nitrogen compound metabolic process;cellular process;cognition;learning or memory;long-term memory;memory;metabolic process;multicellular organismal process;neurological…	adenyl nucleotide binding;adenyl ribonucleotide binding;ATP binding;binding;catalytic activity;glutamate dehydrogenase (NAD+) activity;glutamate dehydrogenase [NAD(P)+] activity;GTP binding;guanyl nucleotide binding;guanyl ribonucleotide binding;nucleotide binding;oxidoreductase activity;oxidoreductase activity, acting on the CH-NH2 group of donors;oxidoreductase activity, acting on the CH-NH2 gr…	cell part;cytoplasmic part;intracellular organelle lumen;intracellular organelle part;intracellular part;membrane;membrane-enclosed lumen;mitochondrial inner membrane;mitochondrial matrix;mitochondrial membrane;mitochondrial part;organelle inner membrane;organelle lumen;organelle membrane;organelle part	Alanine, aspartate and glutamate metabolism;Arginine and proline metabolism;D-Glutamine and D-glutamate metabolism;Nitrogen metabolism;Proximal tubule bicarbonate reclamation	1	0.00387911	77.379	77.379	-0.35527	30012000
F7CFA5;P26443	65;363	F7CFA5;P26443	Glutamate dehydrogenase 1, mitochondrial	Glud1;Glud1	LEDFKLQHGSILGFPKAKVYEGSILEADCDI	NaN		0.259204	0.0776246	-0.181579	#DIV/0!		3	___1	amine metabolic process;behavior;biological regulation;carboxylic acid metabolic process;cellular amine metabolic process;cellular amino acid metabolic process;cellular ketone metabolic process;cellular metabolic process;cellular nitrogen compound metabolic process;cellular process;cognition;learning or memory;long-term memory;memory;metabolic process;multicellular organismal process;neurological…	adenyl nucleotide binding;adenyl ribonucleotide binding;ATP binding;binding;catalytic activity;glutamate dehydrogenase (NAD+) activity;glutamate dehydrogenase [NAD(P)+] activity;GTP binding;guanyl nucleotide binding;guanyl ribonucleotide binding;nucleotide binding;oxidoreductase activity;oxidoreductase activity, acting on the CH-NH2 group of donors;oxidoreductase activity, acting on the CH-NH2 gr…	cell part;cytoplasmic part;intracellular organelle lumen;intracellular organelle part;intracellular part;membrane;membrane-enclosed lumen;mitochondrial inner membrane;mitochondrial matrix;mitochondrial membrane;mitochondrial part;organelle inner membrane;organelle lumen;organelle membrane;organelle part	Alanine, aspartate and glutamate metabolism;Arginine and proline metabolism;D-Glutamine and D-glutamate metabolism;Nitrogen metabolism;Proximal tubule bicarbonate reclamation	1	8.27e-06	89.231	89.231	-1.085	240080000
Q01514;A4UUI2;Q9Z0E6	372;372;372	Q01514;Q9Z0E6	Interferon-induced guanylate-binding protein 1;Interferon-induced guanylate-binding protein 2	Gbp1;Gbp1;Gbp2	PIESEAIEVFLKNSFKDVDQKFQTELGNLLV;TCEREAIEVFMKNSFKDVDQKFQEELGAQLE	NaN		#VALUE!	NaN	0.775266	2.32009	+	2	___1	adhesion to other organism involved in symbiotic interaction;adhesion to symbiont;biological adhesion;catabolic process;cellular catabolic process;cellular metabolic process;cellular nitrogen compound catabolic process;cellular nitrogen compound metabolic process;cellular process;cellular response to biotic stimulus;cellular response to chemical stimulus;cellular response to cytokine stimulus;cel…	binding;catalytic activity;GMP binding;GTP binding;GTPase activity;guanyl nucleotide binding;guanyl ribonucleotide binding;hydrolase activity;hydrolase activity, acting on acid anhydrides;hydrolase activity, acting on acid anhydrides, in phosphorus-containing anhydrides;nucleoside-triphosphatase activity;nucleotide binding;purine nucleotide binding;purine ribonucleoside triphosphate binding;purin…	cell part;cytoplasmic part;cytoplasmic vesicle;extracellular region part;Golgi apparatus part;Golgi membrane;host cell part;intracellular membrane-bounded organelle;intracellular organelle;intracellular organelle part;intracellular part;membrane;membrane-bounded organelle;nucleus;organelle;organelle membrane;organelle part;other organism part;symbiont-containing vacuole membrane;vacuolar membrane…		1	0.000637762	120.65	120.65	0.2979	367890000
Q91V76	85	Q91V76	Ester hydrolase C11orf54 homolog		PLVNKKKVYDLNEIAKVIKLPGAFILGAGAG	NaN		#VALUE!	NaN	NaN	1.59747		2	___1		binding;catalytic activity;cation binding;hydrolase activity;ion binding;metal ion binding	cell part;intracellular membrane-bounded organelle;intracellular organelle;intracellular part;membrane-bounded organelle;nucleus;organelle		1	5.86e-06	129.37	129.37	-1.3628	178100000
A2AE89;F6WHQ7;P10649;P19639	170;120;144;144	A2AE89;F6WHQ7;P10649;P19639	Glutathione S-transferase Mu 1;Glutathione S-transferase Mu 3	Gstm1;Gstm1;Gstm1;Gstm3	KAIPEKMKLYSEFLGKRPWFAGDKVTYVDFL;KTIPEKMKLYSEFLGKRPWFAGDKVTYVDFL	NaN		#VALUE!	NaN	NaN	1.52092	+	3	___1	cellular process;cellular response to chemical stimulus;cellular response to drug;cellular response to organic cyclic compound;cellular response to organic substance;cellular response to stimulus;response to chemical stimulus;response to drug;response to organic cyclic compound;response to organic substance;response to stimulus	binding;catalytic activity;glutathione transferase activity;identical protein binding;protein binding;protein dimerization activity;protein heterodimerization activity;protein homodimerization activity;transferase activity;transferase activity, transferring alkyl or aryl (other than methyl) groups	cell part;cytoplasm;intracellular part	Drug metabolism - cytochrome P450;Glutathione metabolism;Metabolism of xenobiotics by cytochrome P450	1	7.61e-87	227	124.68	1.8817	3258600000
A2AE89;F6WHQ7;P10649	155;105;129	A2AE89;F6WHQ7;P10649	Glutathione S-transferase Mu 1	Gstm1;Gstm1;Gstm1	ASCSLPQEKQKPEFLKTIPEKMKLYSEFLGK;LCYNPDFEKQKPEFLKTIPEKMKLYSEFLGK	NaN		#VALUE!	NaN	NaN	1.12109		3	___1	cellular process;cellular response to chemical stimulus;cellular response to drug;cellular response to stimulus;response to chemical stimulus;response to drug;response to stimulus	binding;catalytic activity;glutathione transferase activity;identical protein binding;protein binding;protein dimerization activity;protein heterodimerization activity;protein homodimerization activity;transferase activity;transferase activity, transferring alkyl or aryl (other than methyl) groups	cell part;cytoplasm;intracellular part	Drug metabolism - cytochrome P450;Glutathione metabolism;Metabolism of xenobiotics by cytochrome P450	1	4.46e-43	197.36	109.16	-0.13185	4083500000
D3Z0Z9;E9PXL6;E9PYX4;E9PZH9;E9PZP4;E9Q1S8;D3YV03;F6UT49;F6QXU4;E9QAC7;F6QHJ3;F7CFF7;P16858;E9PX42;E9Q9E5;E9PX72;F8WJL5;E9Q0E3;E9PZL2;F6ZQM8;D3YYI5	61;59;61;59;61;59;59;61;61;59;61;61;59;59;59;59;59;59;59;55;61	D3Z0Z9;E9PXL6;E9PYX4;E9PZH9;E9PZP4;E9Q1S8;E9QAC7;F6QHJ3;P16858	Glyceraldehyde-3-phosphate dehydrogenase;Glyceraldehyde-3-phosphate dehydrogenase;Glyceraldehyde-3-phosphate dehydrogenase;Glyceraldehyde-3-phosphate dehydrogenase;Glyceraldehyde-3-phosphate dehydrogenase;Glyceraldehyde-3-phosphate dehydrogenase;Glyceraldehyde-3-phosphate dehydrogenase;Glyceraldehyde-3-phosphate dehydrogenase;Glyceraldehyde-3-phosphate dehydrogenase;Glyceraldehyde-3-phosphate deh…	Gm5069;Gm3200;Gm5507;Gm10566;Gm10313;Gm4609;Gm10290;Gm7251;Gm4795;Gm3839;Gm5327;Gm6669;Gapdh;Gm2606;Gm10481;Gm5559;Gapdh;Gm10293;Gm10327;Gm3222;Gm7293	IFLCDSTHGKFNGTVKAENGKLVINRKTITI;MFQSDSTHSKFNGTVKAENGKLVINGKPITI;MFQYDSTHGKFNGTVKAENGKLVINGKPITI;MFQYDSTHSKFNGTVKAENGKLVINGKPITI	NaN		#VALUE!	NaN	NaN	1.10006		2	___1	alcohol catabolic process;alcohol metabolic process;apoptosis;biological regulation;carbohydrate catabolic process;carbohydrate metabolic process;catabolic process;cell death;cellular carbohydrate catabolic process;cellular carbohydrate metabolic process;cellular component organization;cellular component organization at cellular level;cellular component organization or biogenesis;cellular compone…	binding;catalytic activity;coenzyme binding;cofactor binding;cytoskeletal protein binding;glyceraldehyde-3-phosphate dehydrogenase (NAD+) (phosphorylating) activity;microtubule binding;NAD binding;NADP binding;nucleotide binding;oxidoreductase activity;oxidoreductase activity, acting on the aldehyde or oxo group of donors;oxidoreductase activity, acting on the aldehyde or oxo group of donors, NAD…	cell part;cytoplasmic part;cytoskeleton;cytosol;intracellular membrane-bounded organelle;intracellular non-membrane-bounded organelle;intracellular organelle;intracellular part;membrane-bounded organelle;microtubule cytoskeleton;non-membrane-bounded organelle;nucleus;organelle	Alzheimer's disease;Glycolysis / Gluconeogenesis	1	5.95e-05	121.68	76.522	0.68233	134900000
E9PXL6;E9PYX4;E9Q1S8;F6QXU4;E9QAC7;P16858;E9PX42;E9Q9E5;E9PX72;F8WJL5;E9Q0E3;E9PZL2;D3YUV0;F6ZQM8	70;72;70;72;70;70;70;70;70;70;70;70;70;66	E9PXL6;E9PYX4;E9Q1S8;E9QAC7;P16858	Glyceraldehyde-3-phosphate dehydrogenase;Glyceraldehyde-3-phosphate dehydrogenase;Glyceraldehyde-3-phosphate dehydrogenase;Glyceraldehyde-3-phosphate dehydrogenase;Glyceraldehyde-3-phosphate dehydrogenase;Glyceraldehyde-3-phosphate dehydrogenase;Glyceraldehyde-3-phosphate dehydrogenase;Glyceraldehyde-3-phosphate dehydrogenase;Glyceraldehyde-3-phosphate dehydrogenase;Glyceraldehyde-3-phosphate deh…	Gm3200;Gm5507;Gm4609;Gm4795;Gm3839;Gapdh;Gm2606;Gm10481;Gm5559;Gapdh;Gm10293;Gm10327;Gm10291;Gm3222	NGTVKAENGKLVINGKPITIFQERDPTNIKW	NaN		#VALUE!	NaN	NaN	1.07149		3	___1	alcohol catabolic process;alcohol metabolic process;apoptosis;biological regulation;carbohydrate catabolic process;carbohydrate metabolic process;catabolic process;cell death;cellular carbohydrate catabolic process;cellular carbohydrate metabolic process;cellular component organization;cellular component organization at cellular level;cellular component organization or biogenesis;cellular compone…	binding;catalytic activity;coenzyme binding;cofactor binding;cytoskeletal protein binding;glyceraldehyde-3-phosphate dehydrogenase (NAD+) (phosphorylating) activity;microtubule binding;NAD binding;NADP binding;nucleotide binding;oxidoreductase activity;oxidoreductase activity, acting on the aldehyde or oxo group of donors;oxidoreductase activity, acting on the aldehyde or oxo group of donors, NAD…	cell part;cytoplasmic part;cytoskeleton;cytosol;intracellular membrane-bounded organelle;intracellular non-membrane-bounded organelle;intracellular organelle;intracellular part;membrane-bounded organelle;microtubule cytoskeleton;non-membrane-bounded organelle;nucleus;organelle	Alzheimer's disease;Glycolysis / Gluconeogenesis	1	1.26e-48	149.36	149.36	1.2795	2168000000
E9PYX4;E9Q1S8;E9QAC7;P16858;E9PX42;E9Q9E5;E9PX72;F8WJL5;E9Q0E3;E9PZL2	107;105;105;105;105;105;105;105;105;105	E9PYX4;E9Q1S8;E9QAC7;P16858	Glyceraldehyde-3-phosphate dehydrogenase;Glyceraldehyde-3-phosphate dehydrogenase;Glyceraldehyde-3-phosphate dehydrogenase;Glyceraldehyde-3-phosphate dehydrogenase;Glyceraldehyde-3-phosphate dehydrogenase;Glyceraldehyde-3-phosphate dehydrogenase;Glyceraldehyde-3-phosphate dehydrogenase;Glyceraldehyde-3-phosphate dehydrogenase;Glyceraldehyde-3-phosphate dehydrogenase	Gm5507;Gm4609;Gm3839;Gapdh;Gm2606;Gm10481;Gm5559;Gapdh;Gm10293;Gm10327	AEYVVESTGVFTTMEKAGAHLKGGAKRVIIS	NaN		#VALUE!	NaN	NaN	1.04973		3	___1	alcohol catabolic process;alcohol metabolic process;apoptosis;biological regulation;carbohydrate catabolic process;carbohydrate metabolic process;catabolic process;cell death;cellular carbohydrate catabolic process;cellular carbohydrate metabolic process;cellular component organization;cellular component organization at cellular level;cellular component organization or biogenesis;cellular compone…	binding;catalytic activity;coenzyme binding;cofactor binding;cytoskeletal protein binding;glyceraldehyde-3-phosphate dehydrogenase (NAD+) (phosphorylating) activity;microtubule binding;NAD binding;NADP binding;nucleotide binding;oxidoreductase activity;oxidoreductase activity, acting on the aldehyde or oxo group of donors;oxidoreductase activity, acting on the aldehyde or oxo group of donors, NAD…	cell part;cytoplasmic part;cytoskeleton;cytosol;intracellular membrane-bounded organelle;intracellular non-membrane-bounded organelle;intracellular organelle;intracellular part;membrane-bounded organelle;microtubule cytoskeleton;non-membrane-bounded organelle;nucleus;organelle	Alzheimer's disease;Glycolysis / Gluconeogenesis	1	1.83e-13	91.583	86.32	-2.0005	306150000
O35490;A2ALP9	150;150	O35490	Betaine--homocysteine S-methyltransferase 1	Bhmt;Bhmt-ps1	VEVKKIFRQQLEVFMKKNVDFLIAEYFEHVE	NaN		#VALUE!	NaN	-1.51428	0.986676		2	___1	amine biosynthetic process;amine metabolic process;aspartate family amino acid biosynthetic process;aspartate family amino acid metabolic process;betaine catabolic process;betaine metabolic process;biosynthetic process;carboxylic acid biosynthetic process;carboxylic acid metabolic process;catabolic process;cellular amine metabolic process;cellular amino acid biosynthetic process;cellular amino ac…	betaine-homocysteine S-methyltransferase activity;binding;catalytic activity;cation binding;homocysteine S-methyltransferase activity;ion binding;metal ion binding;methyltransferase activity;S-adenosylmethionine-dependent methyltransferase activity;S-methyltransferase activity;transferase activity;transferase activity, transferring one-carbon groups;transition metal ion binding;zinc ion binding	cell part;cytoplasm;intracellular part	Cysteine and methionine metabolism;Glycine, serine and threonine metabolism	1	1.96e-12	149.23	76.17	-1.4114	1445100000
D3Z0Z9;E9PXL6;E9PZH9;F6T0W6;E9PZP4;E9Q1F8;E9Q1S8;D3YV03;F6UT49;F6QXU4;P16858;E9PX42;E9Q9E5;E9PX72;F8WJL5;E9PZL2;F6ZQM8;D3YYI5	256;252;251;80;254;254;252;252;254;254;252;252;252;252;221;253;248;255	D3Z0Z9;E9PXL6;E9PZH9;E9PZP4;E9Q1F8;E9Q1S8;P16858	Glyceraldehyde-3-phosphate dehydrogenase;Glyceraldehyde-3-phosphate dehydrogenase;Glyceraldehyde-3-phosphate dehydrogenase;Glyceraldehyde-3-phosphate dehydrogenase;Glyceraldehyde-3-phosphate dehydrogenase;Glyceraldehyde-3-phosphate dehydrogenase;Glyceraldehyde-3-phosphate dehydrogenase;Glyceraldehyde-3-phosphate dehydrogenase;Glyceraldehyde-3-phosphate dehydrogenase;Glyceraldehyde-3-phosphate deh…	Gm5069;Gm3200;Gm10566;Gm2221;Gm10313;Gm8055;Gm4609;Gm10290;Gm7251;Gm4795;Gapdh;Gm2606;Gm10481;Gm5559;Gapdh;Gm10327;Gm3222;Gm7293	NMSVVDLTCRLEKPAKYDDIKKVVKQASEGP;NVSIVDLTCRLEKPAKYDDIKKVVKQASEGP;NVSIVDLTFGLEKPAKYDDIKKVVKQASEGP;NVSVVDLTCCLEKPAKYDDIKKVVKQASEGP;NVSVVDLTCRLEKPAKYDDIKKVVKQASEGP	NaN		#VALUE!	NaN	NaN	0.944444		3	___1	alcohol catabolic process;alcohol metabolic process;apoptosis;biological regulation;carbohydrate catabolic process;carbohydrate metabolic process;catabolic process;cell death;cellular carbohydrate catabolic process;cellular carbohydrate metabolic process;cellular component organization;cellular component organization at cellular level;cellular component organization or biogenesis;cellular compone…	binding;catalytic activity;coenzyme binding;cofactor binding;cytoskeletal protein binding;glyceraldehyde-3-phosphate dehydrogenase (NAD+) (phosphorylating) activity;microtubule binding;NAD binding;NADP binding;nucleotide binding;oxidoreductase activity;oxidoreductase activity, acting on the aldehyde or oxo group of donors;oxidoreductase activity, acting on the aldehyde or oxo group of donors, NAD…	cell part;cytoplasmic part;cytoskeleton;cytosol;intracellular membrane-bounded organelle;intracellular non-membrane-bounded organelle;intracellular organelle;intracellular part;membrane-bounded organelle;microtubule cytoskeleton;non-membrane-bounded organelle;nucleus;organelle	Alzheimer's disease;Glycolysis / Gluconeogenesis	1	0.000584983	120.09	107.95	0.34693	1235900000
O35490;A2ALP9	340;340	O35490	Betaine--homocysteine S-methyltransferase 1	Bhmt;Bhmt-ps1	SEKHGSWGSGLDMHTKPWIRARARKEYWQNL	NaN		#VALUE!	NaN	-1.51428	0.840602		3	___1	amine biosynthetic process;amine metabolic process;aspartate family amino acid biosynthetic process;aspartate family amino acid metabolic process;betaine catabolic process;betaine metabolic process;biosynthetic process;carboxylic acid biosynthetic process;carboxylic acid metabolic process;catabolic process;cellular amine metabolic process;cellular amino acid biosynthetic process;cellular amino ac…	betaine-homocysteine S-methyltransferase activity;binding;catalytic activity;cation binding;homocysteine S-methyltransferase activity;ion binding;metal ion binding;methyltransferase activity;S-adenosylmethionine-dependent methyltransferase activity;S-methyltransferase activity;transferase activity;transferase activity, transferring one-carbon groups;transition metal ion binding;zinc ion binding	cell part;cytoplasm;intracellular part	Cysteine and methionine metabolism;Glycine, serine and threonine metabolism	1	6.87e-195	287.01	135.09	-0.10074	1513700000
A2AE89;P10649	31;31	A2AE89;P10649	Glutathione S-transferase Mu 1	Gstm1;Gstm1	PIRMLLEYTDSSYDEKRYTMGDAPDFDRSQW	NaN		#VALUE!	NaN	NaN	0.820557		3	___1	cellular process;cellular response to chemical stimulus;cellular response to drug;cellular response to stimulus;response to chemical stimulus;response to drug;response to stimulus	binding;catalytic activity;glutathione transferase activity;identical protein binding;protein binding;protein dimerization activity;protein heterodimerization activity;protein homodimerization activity;transferase activity;transferase activity, transferring alkyl or aryl (other than methyl) groups	cell part;cytoplasm;intracellular part	Drug metabolism - cytochrome P450;Glutathione metabolism;Metabolism of xenobiotics by cytochrome P450	1	7.34e-86	236.92	113.69	0.13349	3997400000
Q64514;Q64514-2	1222;1209	Q64514;Q64514-2	Tripeptidyl-peptidase 2	Tpp2	MYGRGLKFATKLVEEKPTKENWKNCIQLMKL	NaN		#VALUE!	NaN	NaN	0.806079		2	___1	macromolecule metabolic process;metabolic process;primary metabolic process;protein metabolic process;proteolysis	aminopeptidase activity;catalytic activity;endopeptidase activity;exopeptidase activity;hydrolase activity;peptidase activity;peptidase activity, acting on L-amino acid peptides;serine hydrolase activity;serine-type endopeptidase activity;serine-type peptidase activity	cell part;cytoplasm;intracellular membrane-bounded organelle;intracellular organelle;intracellular part;membrane-bounded organelle;nucleus;organelle		1	0.00974178	81.594	78.934	-0.10354	45560000
E9PXL6;E9QAC7;P16858;E9PX42;E9Q9E5;E9Q0E3;E9PZL2;D3YUV0;F6ZQM8;D3YYI5	137;137;137;137;137;137;137;137;133;140	E9PXL6;E9QAC7;P16858	Glyceraldehyde-3-phosphate dehydrogenase;Glyceraldehyde-3-phosphate dehydrogenase;Glyceraldehyde-3-phosphate dehydrogenase;Glyceraldehyde-3-phosphate dehydrogenase;Glyceraldehyde-3-phosphate dehydrogenase;Glyceraldehyde-3-phosphate dehydrogenase;Glyceraldehyde-3-phosphate dehydrogenase;Glyceraldehyde-3-phosphate dehydrogenase;Glyceraldehyde-3-phosphate dehydrogenase;Glyceraldehyde-3-phosphate deh…	Gm3200;Gm3839;Gapdh;Gm2606;Gm10481;Gm10293;Gm10327;Gm10291;Gm3222;Gm7293	PSADAPMFVMGVNHEKYDNSLKIVSNASCTT	NaN		#VALUE!	NaN	NaN	0.773695	+	3	___1	alcohol catabolic process;alcohol metabolic process;apoptosis;biological regulation;carbohydrate catabolic process;carbohydrate metabolic process;catabolic process;cell death;cellular carbohydrate catabolic process;cellular carbohydrate metabolic process;cellular component organization;cellular component organization at cellular level;cellular component organization or biogenesis;cellular compone…	binding;catalytic activity;coenzyme binding;cofactor binding;cytoskeletal protein binding;glyceraldehyde-3-phosphate dehydrogenase (NAD+) (phosphorylating) activity;microtubule binding;NAD binding;NADP binding;nucleotide binding;oxidoreductase activity;oxidoreductase activity, acting on the aldehyde or oxo group of donors;oxidoreductase activity, acting on the aldehyde or oxo group of donors, NAD…	cell part;cytoplasmic part;cytoskeleton;cytosol;intracellular membrane-bounded organelle;intracellular non-membrane-bounded organelle;intracellular organelle;intracellular part;membrane-bounded organelle;microtubule cytoskeleton;non-membrane-bounded organelle;nucleus;organelle	Alzheimer's disease;Glycolysis / Gluconeogenesis	1	3.29e-288	296.96	129.24	-0.13828	16359000000
Q6GSS7;Q64523;F8WIX8	96;96;91	Q6GSS7	Histone H2A type 2-A;Histone H2A type 2-C;Histone H2A	Hist2h2aa1;Hist2h2ac;Hist1h2al	PRHLQLAIRNDEELNKLLGKVTIAQGGVLPN	NaN		#VALUE!	NaN	0.735255	0.770476		2	___1	cellular component assembly;cellular component assembly at cellular level;cellular component organization;cellular component organization at cellular level;cellular component organization or biogenesis;cellular component organization or biogenesis at cellular level;cellular macromolecular complex assembly;cellular macromolecular complex subunit organization;cellular process;chromatin organization…	binding;DNA binding;nucleic acid binding	cell part;chromosomal part;intracellular membrane-bounded organelle;intracellular organelle;intracellular organelle part;intracellular part;macromolecular complex;membrane-bounded organelle;nucleosome;nucleus;organelle;organelle part;protein-DNA complex	Systemic lupus erythematosus	1	4.42e-12	149.41	149.41	2.1268	105640000
F6WHQ7;P10649;P19639	149;173;173	F6WHQ7;P10649;P19639	Glutathione S-transferase Mu 1;Glutathione S-transferase Mu 3	Gstm1;Gstm1;Gstm3	FLAYDILDQYRMFEPKCLDAFPNLRDFLARF	NaN		#VALUE!	NaN	NaN	0.763535		2	___1	cellular process;cellular response to chemical stimulus;cellular response to drug;cellular response to organic cyclic compound;cellular response to organic substance;cellular response to stimulus;response to chemical stimulus;response to drug;response to organic cyclic compound;response to organic substance;response to stimulus	binding;catalytic activity;glutathione transferase activity;identical protein binding;protein binding;protein dimerization activity;protein heterodimerization activity;protein homodimerization activity;transferase activity;transferase activity, transferring alkyl or aryl (other than methyl) groups	cell part;cytoplasm;intracellular part	Drug metabolism - cytochrome P450;Glutathione metabolism;Metabolism of xenobiotics by cytochrome P450	1	7.7e-14	129.38	106.13	1.7598	777680000
Q9R0Q7;E9PXA6;D3Z7C6	33;33;33	Q9R0Q7	Prostaglandin E synthase 3	Ptges3;Gm9769;Gm9769	EFCVEDSKDVNVNFEKSKLTFSCLGGSDNFK	NaN		#VALUE!	NaN	0.207852	0.762319		2	___1	biosynthetic process;carboxylic acid biosynthetic process;carboxylic acid metabolic process;cellular biosynthetic process;cellular ketone metabolic process;cellular lipid metabolic process;cellular macromolecule metabolic process;cellular metabolic process;cellular process;cellular protein metabolic process;chaperone cofactor-dependent protein refolding;chaperone-mediated protein folding;fatty ac…	binding;catalytic activity;DNA polymerase activity;intramolecular oxidoreductase activity;isomerase activity;nucleotidyltransferase activity;prostaglandin-E synthase activity;protein binding;RNA-directed DNA polymerase activity;telomerase activity;transferase activity;transferase activity, transferring phosphorus-containing groups;unfolded protein binding	cell part;cytoplasm;intracellular organelle part;intracellular part;macromolecular complex;nuclear part;organelle part;ribonucleoprotein complex;telomerase holoenzyme complex		1	0.000316368	100.55	100.55	0.90364	119930000
Q8CIH9	60	Q8CIH9	Amidophosphoribosyltransferase	Ppat	QESAGIVTSDGSAVPKFRVHKGMGLVNHVFT	NaN		#VALUE!	NaN	-0.86945	0.741579		3	___1	amine catabolic process;amine metabolic process;anatomical structure development;anatomical structure morphogenesis;biological regulation;biosynthetic process;body fluid secretion;carboxylic acid catabolic process;carboxylic acid metabolic process;catabolic process;cell cycle process;cellular amine metabolic process;cellular amino acid catabolic process;cellular amino acid metabolic process;cellu…	amidophosphoribosyltransferase activity;binding;catalytic activity;cation binding;ion binding;iron-sulfur cluster binding;metal cluster binding;metal ion binding;transferase activity;transferase activity, transferring glycosyl groups;transferase activity, transferring pentosyl groups		Alanine, aspartate and glutamate metabolism;Purine metabolism	1	1.02e-88	211.33	90.654	0.88919	217620000
D3Z1U3;P49429	88;127	D3Z1U3;P49429	4-hydroxyphenylpyruvate dioxygenase	Hpd;Hpd	ERGAKIVREPWVEQDKFGKVKFAVLQTYGDT	NaN		#VALUE!	NaN	NaN	0.686663	+	3	___1	amine catabolic process;amine metabolic process;aromatic amino acid family catabolic process;aromatic amino acid family metabolic process;aromatic compound catabolic process;carboxylic acid catabolic process;carboxylic acid metabolic process;catabolic process;cellular amine metabolic process;cellular amino acid catabolic process;cellular amino acid metabolic process;cellular aromatic compound met…	4-hydroxyphenylpyruvate dioxygenase activity;binding;catalytic activity;cation binding;dioxygenase activity;ion binding;metal ion binding;oxidoreductase activity;oxidoreductase activity, acting on single donors with incorporation of molecular oxygen;oxidoreductase activity, acting on single donors with incorporation of molecular oxygen, incorporation of two atoms of oxygen	cell part;cytoplasmic part;endoplasmic reticulum membrane;endoplasmic reticulum part;Golgi apparatus part;Golgi membrane;intracellular organelle part;intracellular part;membrane;membrane part;organelle membrane;organelle part	Phenylalanine metabolism;Tyrosine metabolism;Ubiquinone and other terpenoid-quinone biosynthesis	1	1.13e-13	144.29	101.3	-0.46233	5573600000
Q7TSH2	1029	Q7TSH2	Phosphorylase b kinase regulatory subunit beta	Phkb	VDLDRLVKEAFHEFQKDESRLKEIEKQDDMT	NaN		#VALUE!	-0.175875	NaN	0.678014		3	___1	carbohydrate metabolic process;cellular carbohydrate metabolic process;cellular glucan metabolic process;cellular macromolecule metabolic process;cellular metabolic process;cellular polysaccharide metabolic process;cellular process;energy derivation by oxidation of organic compounds;energy reserve metabolic process;generation of precursor metabolites and energy;glucan metabolic process;glycogen m…	catalytic activity;hydrolase activity;hydrolase activity, acting on glycosyl bonds;hydrolase activity, hydrolyzing O-glycosyl compounds	cell part;membrane;plasma membrane	Calcium signaling pathway;Insulin signaling pathway	1	2.17e-11	132.31	86.944	-0.23358	226510000
Q61937;Q5SQB5;Q5SQB0;Q9DAY9	32;32;32;32	Q61937	Nucleophosmin	Npm1;Npm1;Npm1;Npm1	YLFGCELKADKDYHFKVDNDENEHQLSLRTV	NaN		#VALUE!	NaN	-0.0606855	0.615204		3	___1	aging;biological regulation;cell aging;cell cycle process;cell growth;cell volume homeostasis;cellular component assembly;cellular component biogenesis;cellular component biogenesis at cellular level;cellular component organization;cellular component organization at cellular level;cellular component organization or biogenesis;cellular component organization or biogenesis at cellular level;cellula…	binding;DNA binding;lipid binding;NF-kappaB binding;nucleic acid binding;phosphatidylinositol binding;phosphatidylinositol-3,4,5-trisphosphate binding;phospholipid binding;protein binding;ribonucleoprotein binding;ribosomal large subunit binding;ribosomal small subunit binding;RNA binding;rRNA binding;transcription factor binding;unfolded protein binding	cell part;centrosome;cytoplasmic part;cytoskeletal part;cytosol;granular component;intracellular non-membrane-bounded organelle;intracellular organelle;intracellular organelle part;intracellular part;large ribosomal subunit;macromolecular complex;microtubule organizing center;non-membrane-bounded organelle;nuclear body;nuclear part;nuclear speck;nucleolar part;nucleoplasm part;organelle;organelle…		1	1.73e-37	150.98	81.723	-0.22548	201710000
E9Q1E3;P17742;F8VPN3	82;82;103	E9Q1E3;P17742	Peptidyl-prolyl cis-trans isomerase;Peptidyl-prolyl cis-trans isomerase A;Peptidyl-prolyl cis-trans isomerase	Gm9234;Ppia;Gm5160	FTRHNGTGGRSIYGEKFEDENFILKHTGPGI	NaN		#VALUE!	NaN	NaN	0.594666		2	___1	biological regulation;cellular macromolecule metabolic process;cellular metabolic process;cellular process;cellular protein metabolic process;macromolecule metabolic process;macromolecule modification;metabolic process;peptidyl-amino acid modification;peptidyl-proline modification;primary metabolic process;protein folding;protein metabolic process;protein modification process;protein peptidyl-pro…	binding;catalytic activity;cis-trans isomerase activity;isomerase activity;peptide binding;peptidyl-prolyl cis-trans isomerase activity	cell part;cytoplasmic part;cytosol;extracellular region;intracellular membrane-bounded organelle;intracellular organelle;intracellular part;membrane-bounded organelle;nucleus;organelle		1	6.19e-49	179.55	115.04	0.51025	945430000
O55060;D3Z380;D3YWK6;D3Z217	140;140;140;140	O55060	Thiopurine S-methyltransferase	Tpmt;Tpmt;Tpmt;Tpmt	LYCCSIFDLPRANIGKFDRIWDRGALVAINP	NaN		#VALUE!	NaN	NaN	0.593662		2	___1		catalytic activity;methyltransferase activity;S-adenosylmethionine-dependent methyltransferase activity;S-methyltransferase activity;thiopurine S-methyltransferase activity;transferase activity;transferase activity, transferring one-carbon groups	cell part;cytoplasm;intracellular part	Drug metabolism - other enzymes	1	5.79e-07	189.7	96.668	-0.4286	479420000
O35490;A2ALP9;Q91WS4	283;283;274	O35490;Q91WS4	Betaine--homocysteine S-methyltransferase 1;S-methylmethionine--homocysteine S-methyltransferase BHMT2	Bhmt;Bhmt-ps1;Bhmt2	PFGLEPRVATRWDIQKYAREAYNLGIRYIGG;PFGLEPRVATRWDIQKYAREAYNLGVRYIGG	NaN		#VALUE!	NaN	-1.51428	0.517737		2	___1	amine biosynthetic process;amine metabolic process;aspartate family amino acid biosynthetic process;aspartate family amino acid metabolic process;betaine catabolic process;betaine metabolic process;biosynthetic process;carboxylic acid biosynthetic process;carboxylic acid metabolic process;catabolic process;cellular amine metabolic process;cellular amino acid biosynthetic process;cellular amino ac…	betaine-homocysteine S-methyltransferase activity;binding;catalytic activity;cation binding;homocysteine S-methyltransferase activity;ion binding;metal ion binding;methyltransferase activity;S-adenosylmethionine-dependent methyltransferase activity;S-methyltransferase activity;transferase activity;transferase activity, transferring one-carbon groups;transition metal ion binding;zinc ion binding	cell part;cytoplasm;intracellular part	Cysteine and methionine metabolism;Glycine, serine and threonine metabolism	1	2.44e-05	177.97	177.97	-0.30193	3390200000
Q9WTP6;Q9WTP6-2	181;181	Q9WTP6	Adenylate kinase 2, mitochondrial	Ak2	DITGEPLIRRSDDNEKALKTRLEAYHTQTTP	NaN		#VALUE!	0.163827	NaN	0.493516		2	___1	2'-deoxyribonucleotide metabolic process;ADP biosynthetic process;ADP metabolic process;AMP metabolic process;anatomical structure development;ATP metabolic process;biosynthetic process;brain development;cellular biosynthetic process;cellular metabolic process;cellular nitrogen compound biosynthetic process;cellular nitrogen compound metabolic process;cellular process;dATP metabolic process;deoxy…	adenyl nucleotide binding;adenyl ribonucleotide binding;adenylate kinase activity;ATP binding;binding;catalytic activity;kinase activity;nucleobase-containing compound kinase activity;nucleotide binding;nucleotide kinase activity;phosphotransferase activity, phosphate group as acceptor;purine nucleotide binding;purine ribonucleoside triphosphate binding;purine ribonucleotide binding;ribonucleotid…	cell part;cytoplasmic part;cytosol;intracellular organelle part;intracellular part;membrane;membrane-enclosed lumen;mitochondrial inner membrane;mitochondrial intermembrane space;mitochondrial membrane;mitochondrial part;organelle envelope lumen;organelle inner membrane;organelle membrane;organelle part	Purine metabolism	1	2.8e-18	207.83	173.37	0.65403	1061500000
D3Z0Z9;E9PXL6;E9PZH9;E9Q1S8;D3YV03;F6UT49;E9QAC7;P16858;E9Q9E5;E9PX72;F8WJL5;E9Q0E3;E9PZL2;D3YUV0;D3YYI5	196;192;191;192;192;194;192;192;192;192;161;192;193;192;195	D3Z0Z9;E9PXL6;E9PZH9;E9Q1S8;E9QAC7;P16858	Glyceraldehyde-3-phosphate dehydrogenase;Glyceraldehyde-3-phosphate dehydrogenase;Glyceraldehyde-3-phosphate dehydrogenase;Glyceraldehyde-3-phosphate dehydrogenase;Glyceraldehyde-3-phosphate dehydrogenase;Glyceraldehyde-3-phosphate dehydrogenase;Glyceraldehyde-3-phosphate dehydrogenase;Glyceraldehyde-3-phosphate dehydrogenase;Glyceraldehyde-3-phosphate dehydrogenase;Glyceraldehyde-3-phosphate deh…	Gm5069;Gm3200;Gm10566;Gm4609;Gm10290;Gm7251;Gm3839;Gapdh;Gm10481;Gm5559;Gapdh;Gm10293;Gm10327;Gm10291;Gm7293	HAITATQKTVDGPSGKLWRDGRGAAQNIIPA;HAITATQKTVDGPSGKLWRDGRGATQNIIPA	NaN		#VALUE!	NaN	NaN	0.489343		2	___1	alcohol catabolic process;alcohol metabolic process;apoptosis;biological regulation;carbohydrate catabolic process;carbohydrate metabolic process;catabolic process;cell death;cellular carbohydrate catabolic process;cellular carbohydrate metabolic process;cellular component organization;cellular component organization at cellular level;cellular component organization or biogenesis;cellular compone…	binding;catalytic activity;coenzyme binding;cofactor binding;cytoskeletal protein binding;glyceraldehyde-3-phosphate dehydrogenase (NAD+) (phosphorylating) activity;microtubule binding;NAD binding;NADP binding;nucleotide binding;oxidoreductase activity;oxidoreductase activity, acting on the aldehyde or oxo group of donors;oxidoreductase activity, acting on the aldehyde or oxo group of donors, NAD…	cell part;cytoplasmic part;cytoskeleton;cytosol;intracellular membrane-bounded organelle;intracellular non-membrane-bounded organelle;intracellular organelle;intracellular part;membrane-bounded organelle;microtubule cytoskeleton;non-membrane-bounded organelle;nucleus;organelle	Alzheimer's disease;Glycolysis / Gluconeogenesis	1	2.09e-25	172.17	115.18	0.50031	4149700000
Q9R1P1;D3YVS3	192;192	Q9R1P1	Proteasome subunit beta type-3	Psmb3;Gm5356	RDAVSGMGVIVHVIEKDKITTRTLKARMD__	NaN		#VALUE!	NaN	-0.194338	0.476221		3	___1	catabolic process;macromolecule catabolic process;macromolecule metabolic process;metabolic process;primary metabolic process;protein catabolic process;protein metabolic process;proteolysis;proteolysis involved in cellular protein catabolic process	catalytic activity;endopeptidase activity;hydrolase activity;peptidase activity;peptidase activity, acting on L-amino acid peptides;threonine-type endopeptidase activity;threonine-type peptidase activity	cell part;cytoplasmic part;cytosol;intracellular membrane-bounded organelle;intracellular organelle;intracellular part;macromolecular complex;membrane-bounded organelle;nucleus;organelle;proteasome core complex;protein complex	Proteasome	1	2.05e-11	98.796	98.796	-0.48309	15248000
Q64514;Q64514-2	708;708	Q64514;Q64514-2	Tripeptidyl-peptidase 2	Tpp2	VQLVKQRAYRSHEFYKFCSLPEKGTLIEAFP	NaN		#VALUE!	NaN	NaN	0.449649		3	___1	macromolecule metabolic process;metabolic process;primary metabolic process;protein metabolic process;proteolysis	aminopeptidase activity;catalytic activity;endopeptidase activity;exopeptidase activity;hydrolase activity;peptidase activity;peptidase activity, acting on L-amino acid peptides;serine hydrolase activity;serine-type endopeptidase activity;serine-type peptidase activity	cell part;cytoplasm;intracellular membrane-bounded organelle;intracellular organelle;intracellular part;membrane-bounded organelle;nucleus;organelle		1	6.01e-06	95.631	95.631	1.0437	92280000
Q8BZ47;E9Q1Y2;P00329	1177;1127;326	Q8BZ47;P00329	Zinc finger protein 609;Alcohol dehydrogenase 1	Znf609;Zfp609;Adh1	KEERDRKLKEDRSRSKDSVPKEDGKESTSSD;LGRTWKGAIFGGFKSKDSVPKLVADFMAKKF	NaN		#VALUE!	NaN	0.589578	0.442234		2	___1	adult behavior;alcohol catabolic process;alcohol metabolic process;behavior;behavioral response to ethanol;biological regulation;carboxylic acid metabolic process;catabolic process;cellular hormone metabolic process;cellular ketone metabolic process;cellular lipid metabolic process;cellular metabolic process;cellular process;diterpenoid metabolic process;ethanol catabolic process;ethanol metaboli…	alcohol dehydrogenase (NAD) activity;binding;catalytic activity;cation binding;ion binding;metal ion binding;oxidoreductase activity;oxidoreductase activity, acting on CH-OH group of donors;oxidoreductase activity, acting on the CH-OH group of donors, NAD or NADP as acceptor;transition metal ion binding;zinc ion binding	cell part;cytoplasmic part;intracellular membrane-bounded organelle;intracellular organelle;intracellular part;membrane-bounded organelle;mitochondrion;organelle	Drug metabolism - cytochrome P450;Fatty acid metabolism;Glycolysis / Gluconeogenesis;Metabolism of xenobiotics by cytochrome P450;Retinol metabolism;Tyrosine metabolism	1	0.0167205	103.87	103.87	0.21133	620770000
P56395;G5E850	19;19	P56395	Cytochrome b5	Cyb5a;Cyb5	QSDKDVKYYTLEEIQKHKDSKSTWVILHHKV	NaN		#VALUE!	NaN	-0.0589318	0.393143		3	___1	carboxylic acid metabolic process;cellular ketone metabolic process;cellular lipid metabolic process;cellular metabolic process;cellular process;electron transport chain;fatty acid metabolic process;generation of precursor metabolites and energy;lipid metabolic process;metabolic process;monocarboxylic acid metabolic process;organic acid metabolic process;oxidation-reduction process;oxoacid metabo…	binding;catalytic activity;cation binding;CoA desaturase activity;heme binding;ion binding;iron ion binding;metal ion binding;oxidoreductase activity;oxidoreductase activity, acting on paired donors, with incorporation or reduction of molecular oxygen;oxidoreductase activity, acting on paired donors, with oxidation of a pair of donors resulting in the reduction of molecular oxygen to two molecule…	cell part;cytoplasmic part;endoplasmic reticulum membrane;endoplasmic reticulum part;integral to membrane;intracellular membrane-bounded organelle;intracellular organelle;intracellular organelle part;intracellular part;intrinsic to membrane;membrane;membrane part;membrane-bounded organelle;mitochondrion;organelle;organelle membrane;organelle part		1	2.68e-43	220.25	100.55	0.55693	3284600000
E9QPD7;G5E8R3;Q05920;E9PW11	887;886;886;683	E9QPD7	Pyruvate carboxylase;Pyruvate carboxylase;Pyruvate carboxylase, mitochondrial	Pcx;Pcx;Pc;Pcx	YTNLHFQAHSMGLGSKFKEVKKAYVEANQML	NaN		#VALUE!	NaN	-0.0834604	0.34883		4	___1	alcohol biosynthetic process;alcohol metabolic process;biosynthetic process;carbohydrate biosynthetic process;carbohydrate metabolic process;carboxylic acid metabolic process;cellular biosynthetic process;cellular carbohydrate biosynthetic process;cellular carbohydrate metabolic process;cellular ketone metabolic process;cellular metabolic process;cellular process;dicarboxylic acid metabolic proce…	adenyl nucleotide binding;adenyl ribonucleotide binding;ATP binding;binding;biotin binding;biotin carboxylase activity;carboxylic acid binding;catalytic activity;cation binding;DNA binding;ion binding;ligase activity;ligase activity, forming carbon-carbon bonds;ligase activity, forming carbon-nitrogen bonds;metal ion binding;monocarboxylic acid binding;nucleic acid binding;nucleotide binding;puri…	cell part;cytoplasmic part;intracellular organelle lumen;intracellular organelle part;intracellular part;membrane;membrane-enclosed lumen;mitochondrial inner membrane;mitochondrial matrix;mitochondrial membrane;mitochondrial part;organelle inner membrane;organelle lumen;organelle membrane;organelle part	Citrate cycle (TCA cycle);Pyruvate metabolism	1	1.19e-49	135.2	76.35	1.7834	472580000
E9Q1E3;P17742	28;28	E9Q1E3;P17742	Peptidyl-prolyl cis-trans isomerase;Peptidyl-prolyl cis-trans isomerase A	Gm9234;Ppia	DDEPLGRVSFELFADKVPKTAENFQALSTGE;DDEPLGRVSFELFADKVPKTAENFRALSTGE	NaN		#VALUE!	NaN	NaN	0.342256		2	___1	biological regulation;cellular macromolecule metabolic process;cellular metabolic process;cellular process;cellular protein metabolic process;macromolecule metabolic process;metabolic process;primary metabolic process;protein folding;protein metabolic process;regulation of biological process;regulation of reproductive process;regulation of viral genome replication;regulation of viral reproduction	binding;catalytic activity;cis-trans isomerase activity;isomerase activity;peptide binding;peptidyl-prolyl cis-trans isomerase activity	cell part;cytoplasmic part;cytosol;extracellular region;intracellular membrane-bounded organelle;intracellular organelle;intracellular part;membrane-bounded organelle;nucleus;organelle		1	7.86e-05	117.27	117.27	-1.3124	129770000
E9QMB7;Q8CES0;F6QNU4	235;235;6	E9QMB7	N-alpha-acetyltransferase 30	Naa30;Naa30;Naa30	YESELQMPDIMRLITKDLSEPYSIYTYRYFI	NaN		#VALUE!	NaN	NaN	0.301459		2	___1		acetyltransferase activity;catalytic activity;N-acetyltransferase activity;N-acyltransferase activity;peptide alpha-N-acetyltransferase activity;peptide N-acetyltransferase activity;transferase activity;transferase activity, transferring acyl groups;transferase activity, transferring acyl groups other than amino-acyl groups	cell part;cytoplasm;intracellular part		1	2.25e-135	252.36	78.078	-0.019972	405630000
Q9D0F9;A2CEK3	523;541	Q9D0F9	Phosphoglucomutase-1	Pgm1;Pgm2	GSAGATIRLYIDSYEKDVAKINQDPQVMLAP	NaN		#VALUE!	NaN	-0.0731067	0.293521		2	___1	alcohol catabolic process;alcohol metabolic process;biosynthetic process;carbohydrate biosynthetic process;carbohydrate catabolic process;carbohydrate metabolic process;catabolic process;cellular biosynthetic process;cellular carbohydrate biosynthetic process;cellular carbohydrate catabolic process;cellular carbohydrate metabolic process;cellular glucan metabolic process;cellular macromolecule bi…	binding;catalytic activity;cation binding;intramolecular transferase activity;intramolecular transferase activity, phosphotransferases;ion binding;isomerase activity;magnesium ion binding;metal ion binding;phosphoglucomutase activity	cell part;cytoplasmic part;cytosol;intracellular part	Amino sugar and nucleotide sugar metabolism;Galactose metabolism;Glycolysis / Gluconeogenesis;Pentose phosphate pathway;Purine metabolism;Starch and sucrose metabolism;Streptomycin biosynthesis	1	4.17e-08	135.6	101.6	1.1477	216660000
Q9R1P1;D3YVS3	77;77	Q9R1P1	Proteasome subunit beta type-3	Psmb3;Gm5356	TVAQRLKFRLNLYELKEGRQIKPYTLMSMVA	NaN		#VALUE!	NaN	-0.194338	0.293124		3	___1	catabolic process;macromolecule catabolic process;macromolecule metabolic process;metabolic process;primary metabolic process;protein catabolic process;protein metabolic process;proteolysis;proteolysis involved in cellular protein catabolic process	catalytic activity;endopeptidase activity;hydrolase activity;peptidase activity;peptidase activity, acting on L-amino acid peptides;threonine-type endopeptidase activity;threonine-type peptidase activity	cell part;cytoplasmic part;cytosol;intracellular membrane-bounded organelle;intracellular organelle;intracellular part;macromolecular complex;membrane-bounded organelle;nucleus;organelle;proteasome core complex;protein complex	Proteasome	1	4.07e-20	172.21	96.229	1.2302	4010700000
F8WGL3;P18760;E9Q1T2;P45591	19;19;19;19	F8WGL3;P45591	Cofilin-1;Cofilin-2	Cfl1;Cfl1;Gm6180;Cfl2	GVAVSDGVIKVFNDMKVRKSSTPEEVKKRKK;GVTVNDEVIKVFNDMKVRKSSTQEEIKKRKK	NaN		#VALUE!	NaN	-0.199121	0.27419		2	___1	actin cytoskeleton organization;actin filament depolymerization;actin filament organization;actin filament-based process;actin polymerization or depolymerization;ameboidal cell migration;anatomical structure morphogenesis;biological regulation;cell migration;cell motility;cell projection organization;cellular component disassembly;cellular component disassembly at cellular level;cellular componen…		actin cytoskeleton;cell cortex part;cell part;cell projection;cell projection membrane;cell projection part;cortical actin cytoskeleton;cortical cytoskeleton;cytoplasm;cytoplasmic part;cytoskeletal part;cytoskeleton;cytosol;extracellular region;intracellular non-membrane-bounded organelle;intracellular organelle;intracellular organelle part;intracellular part;lamellipodium;lamellipodium membrane;…	Axon guidance;Fc gamma R-mediated phagocytosis;Regulation of actin cytoskeleton	1	0.00517042	92.439	92.439	0.43421	190650000
Q64516-1;Q64516;Q64516-2;B1ASZ3	347;353;347;375	Q64516-1	Glycerol kinase	Gk;Gyk	LRDNLGIIKSSEEIEKLAKEVGTSYGCYFVP	NaN		#VALUE!	NaN	0.327406	0.262942		2	___1	alcohol catabolic process;alcohol metabolic process;alditol catabolic process;alditol metabolic process;carbohydrate catabolic process;carbohydrate metabolic process;catabolic process;cellular carbohydrate catabolic process;cellular carbohydrate metabolic process;cellular metabolic process;cellular process;glycerol catabolic process;glycerol metabolic process;glycerol-3-phosphate metabolic proces…	adenyl nucleotide binding;adenyl ribonucleotide binding;ATP binding;binding;catalytic activity;glycerol kinase activity;kinase activity;nucleotide binding;phosphotransferase activity, alcohol group as acceptor;purine nucleotide binding;purine ribonucleoside triphosphate binding;purine ribonucleotide binding;ribonucleotide binding;transferase activity;transferase activity, transferring phosphorus-…	cell part;cytoplasmic part;intracellular membrane-bounded organelle;intracellular organelle;intracellular organelle part;intracellular part;membrane;membrane-bounded organelle;mitochondrial membrane;mitochondrial outer membrane;mitochondrial part;mitochondrion;organelle;organelle membrane;organelle outer membrane;organelle part;outer membrane	Glycerolipid metabolism;Plant-pathogen interaction;PPAR signaling pathway	1	2.89e-07	137.98	137.98	0.19784	127410000
P09041;P09411	30;30	P09041;P09411	Phosphoglycerate kinase 2;Phosphoglycerate kinase 1	Pgk2;Pgk1	KGKRVIMRVDFNVPMKNNQITNNQRIKAAIP;KGKRVVMRVDFNVPMKNNQITNNQRIKAAVP	NaN		#VALUE!	NaN	NaN	0.245646		3	___1	alcohol catabolic process;alcohol metabolic process;carbohydrate catabolic process;carbohydrate metabolic process;catabolic process;cellular carbohydrate catabolic process;cellular carbohydrate metabolic process;cellular metabolic process;cellular process;generation of precursor metabolites and energy;glucose catabolic process;glucose metabolic process;glycolysis;hexose catabolic process;hexose m…	adenyl nucleotide binding;adenyl ribonucleotide binding;ATP binding;binding;catalytic activity;kinase activity;nucleotide binding;phosphoglycerate kinase activity;phosphotransferase activity, carboxyl group as acceptor;purine nucleotide binding;purine ribonucleoside triphosphate binding;purine ribonucleotide binding;ribonucleotide binding;transferase activity;transferase activity, transferring ph…	cell part;cytoplasm;intracellular part	Carbon fixation in photosynthetic organisms;Glycolysis / Gluconeogenesis	1	1.08e-48	180.02	150.59	1.1208	955330000
E9QPD7;G5E8R3;Q05920;E9PW11	317;316;316;113	E9QPD7	Pyruvate carboxylase;Pyruvate carboxylase;Pyruvate carboxylase, mitochondrial	Pcx;Pcx;Pc;Pcx	QVGYENAGTVEFLVDKHGKHYFIEVNSRLQV	NaN		#VALUE!	NaN	-0.0834604	0.21855		3	___1	alcohol biosynthetic process;alcohol metabolic process;biosynthetic process;carbohydrate biosynthetic process;carbohydrate metabolic process;carboxylic acid metabolic process;cellular biosynthetic process;cellular carbohydrate biosynthetic process;cellular carbohydrate metabolic process;cellular ketone metabolic process;cellular metabolic process;cellular process;dicarboxylic acid metabolic proce…	adenyl nucleotide binding;adenyl ribonucleotide binding;ATP binding;binding;biotin binding;biotin carboxylase activity;carboxylic acid binding;catalytic activity;cation binding;DNA binding;ion binding;ligase activity;ligase activity, forming carbon-carbon bonds;ligase activity, forming carbon-nitrogen bonds;metal ion binding;monocarboxylic acid binding;nucleic acid binding;nucleotide binding;puri…	cell part;cytoplasmic part;intracellular organelle lumen;intracellular organelle part;intracellular part;membrane;membrane-enclosed lumen;mitochondrial inner membrane;mitochondrial matrix;mitochondrial membrane;mitochondrial part;organelle inner membrane;organelle lumen;organelle membrane;organelle part	Citrate cycle (TCA cycle);Pyruvate metabolism	1	1.44e-66	188.84	180.03	0.87592	977720000
P17665	25	P17665	Cytochrome c oxidase subunit 7C, mitochondrial	Cox7c	TTSVVRRSHYEEGPGKNLPFSVENKWRLLAM	NaN		#VALUE!	NaN	-0.336833	0.1993		3	___1		catalytic activity;cation transmembrane transporter activity;cytochrome-c oxidase activity;heme-copper terminal oxidase activity;hydrogen ion transmembrane transporter activity;inorganic cation transmembrane transporter activity;ion transmembrane transporter activity;monovalent inorganic cation transmembrane transporter activity;oxidoreductase activity;oxidoreductase activity, acting on a heme gr…	cell part;cytoplasmic part;integral to membrane;intracellular organelle part;intracellular part;intrinsic to membrane;membrane;membrane part;mitochondrial inner membrane;mitochondrial membrane;mitochondrial part;organelle inner membrane;organelle membrane;organelle part	Alzheimer's disease;Cardiac muscle contraction;Huntington's disease;Oxidative phosphorylation;Parkinson's disease	1	5.19e-09	111.01	111.01	-0.2694	136310000
Q3UNZ8	302	Q3UNZ8	Quinone oxidoreductase-like protein 2		LYWGRYQHQDFAVFSKSMSTAMQYCQQGLIH	NaN		#VALUE!	NaN	NaN	0.18187		5	___1		binding;catalytic activity;cation binding;ion binding;metal ion binding;oxidoreductase activity;transition metal ion binding;zinc ion binding	cell part;cytoplasmic part;intracellular membrane-bounded organelle;intracellular organelle;intracellular part;membrane-bounded organelle;mitochondrion;organelle		1	1.63e-79	160.53	88.242	-0.26493	756250000
Q9D0F9;A2CEK3	440;458	Q9D0F9	Phosphoglucomutase-1	Pgm1;Pgm2	FTRYDYEEVEAEGANKMMKDLEALMLDRSFV	NaN		#VALUE!	NaN	-0.0731067	0.163045		2	___1	alcohol catabolic process;alcohol metabolic process;biosynthetic process;carbohydrate biosynthetic process;carbohydrate catabolic process;carbohydrate metabolic process;catabolic process;cellular biosynthetic process;cellular carbohydrate biosynthetic process;cellular carbohydrate catabolic process;cellular carbohydrate metabolic process;cellular glucan metabolic process;cellular macromolecule bi…	binding;catalytic activity;cation binding;intramolecular transferase activity;intramolecular transferase activity, phosphotransferases;ion binding;isomerase activity;magnesium ion binding;metal ion binding;phosphoglucomutase activity	cell part;cytoplasmic part;cytosol;intracellular part	Amino sugar and nucleotide sugar metabolism;Galactose metabolism;Glycolysis / Gluconeogenesis;Pentose phosphate pathway;Purine metabolism;Starch and sucrose metabolism;Streptomycin biosynthesis	1	4.98e-40	171.08	126.77	0.60885	53761000
P17742;F8VPN3	44;65	P17742	Peptidyl-prolyl cis-trans isomerase A;Peptidyl-prolyl cis-trans isomerase	Ppia;Gm5160	VPKTAENFRALSTGEKGFGYKGSSFHRIIPG	NaN		#VALUE!	NaN	0.161824	0.15948		2	___1	biological regulation;cellular macromolecule metabolic process;cellular metabolic process;cellular process;cellular protein metabolic process;macromolecule metabolic process;macromolecule modification;metabolic process;peptidyl-amino acid modification;peptidyl-proline modification;primary metabolic process;protein folding;protein metabolic process;protein modification process;protein peptidyl-pro…	binding;catalytic activity;cis-trans isomerase activity;isomerase activity;peptide binding;peptidyl-prolyl cis-trans isomerase activity	cell part;cytoplasmic part;cytosol;extracellular region;intracellular membrane-bounded organelle;intracellular organelle;intracellular part;membrane-bounded organelle;nucleus;organelle		1	9.36e-07	122.7	105.17	-0.97135	107190000
Q9DBF1;G3UYR8;G3UY72;E9Q1H3;Q9DBF1-2	86;86;84;87;58	Q9DBF1;Q9DBF1-2	Alpha-aminoadipic semialdehyde dehydrogenase	Aldh7a1;Aldh7a1;Aldh7a1;Aldh7a1	PANNEPIARVRQASLKDYEETIGKAKKAWNI	NaN		#VALUE!	NaN	NaN	0.127984		2	___1	alcohol metabolic process;amine biosynthetic process;amine metabolic process;betaine biosynthetic process;betaine metabolic process;biosynthetic process;carboxylic acid biosynthetic process;carboxylic acid metabolic process;cellular amine metabolic process;cellular amino acid biosynthetic process;cellular amino acid metabolic process;cellular biogenic amine metabolic process;cellular biosynthetic…	betaine-aldehyde dehydrogenase activity;catalytic activity;L-aminoadipate-semialdehyde dehydrogenase activity;oxidoreductase activity;oxidoreductase activity, acting on the aldehyde or oxo group of donors;oxidoreductase activity, acting on the aldehyde or oxo group of donors, NAD or NADP as acceptor	cell part;cytoplasmic part;cytosol;intracellular membrane-bounded organelle;intracellular organelle;intracellular part;membrane-bounded organelle;mitochondrion;nucleus;organelle	Arginine and proline metabolism;Ascorbate and aldarate metabolism;beta-Alanine metabolism;Fatty acid metabolism;Glycerolipid metabolism;Glycine, serine and threonine metabolism;Glycolysis / Gluconeogenesis;Histidine metabolism;Lysine biosynthesis;Lysine degradation;Propanoate metabolism;Pyruvate metabolism;Tryptophan metabolism;Valine, leucine and isoleucine degradation	1	2.63e-73	238.88	80.411	1.5895	3971300000
O35226;O35226-4;O35226-2;O35226-3;O35226-5	122;122;122;122;122	O35226;O35226-2	26S proteasome non-ATPase regulatory subunit 4	Psmd4	MRIIAFVGSPVEDNEKDLVKLAKRLKKEKVN	NaN		#VALUE!	NaN	NaN	0.0927855		2	___1	catabolic process;cellular catabolic process;cellular macromolecule catabolic process;cellular macromolecule metabolic process;cellular metabolic process;cellular process;macromolecule catabolic process;macromolecule metabolic process;metabolic process;modification-dependent macromolecule catabolic process;modification-dependent protein catabolic process;primary metabolic process;protein metaboli…		cell part;intracellular part;macromolecular complex;proteasome accessory complex;proteasome regulatory particle, base subcomplex;protein complex	Proteasome	1	7.6e-43	164.93	118.24	3.1562	330120000
P25444;E9PV46;D3YWJ3;D3YVC1;D3YWA0;F8VQ36;F6YTZ4;D3Z536	58;58;58;58;58;52;40;58	P25444	40S ribosomal protein S2	Rps2;Gm8841;Rps2;Rps2;Gm6139;Gm4968;Gm6576;Gm8225	GRGRGRGARGGKAEDKEWIPVTKLGRLVKDM	NaN		#VALUE!	NaN	0.3109	0.0796057		2	___1	biosynthetic process;cellular biosynthetic process;cellular macromolecule biosynthetic process;cellular macromolecule metabolic process;cellular metabolic process;cellular process;cellular protein metabolic process;macromolecule biosynthetic process;macromolecule metabolic process;metabolic process;primary metabolic process;protein metabolic process;translation	binding;nucleic acid binding;RNA binding;structural constituent of ribosome;structural molecule activity	cell part;intracellular organelle part;intracellular part;macromolecular complex;organelle part;ribonucleoprotein complex;small ribosomal subunit	Ribosome	1	0.00054925	110.38	110.38	1.8866	109700000
D3YWR7;D3Z1A1;Q8BVI4;D3Z099	47;99;99;116	D3YWR7;D3Z1A1;Q8BVI4	Dihydropteridine reductase	Qdpr;Qdpr;Qdpr;Qdpr	AGGWAGGNAKSKSLFKNCDMMWKQSMWTSTI	NaN		#VALUE!	NaN	NaN	0.0716625		2	___1	amine catabolic process;amine metabolic process;anatomical structure development;aromatic amino acid family catabolic process;aromatic amino acid family metabolic process;aromatic compound biosynthetic process;aromatic compound catabolic process;biosynthetic process;carboxylic acid catabolic process;carboxylic acid metabolic process;catabolic process;cellular amine metabolic process;cellular amin…	6,7-dihydropteridine reductase activity;binding;catalytic activity;coenzyme binding;cofactor binding;NAD binding;NADH binding;NADP binding;NADPH binding;nucleotide binding;oxidoreductase activity;oxidoreductase activity, acting on the CH-NH group of donors;oxidoreductase activity, acting on the CH-NH group of donors, NAD or NADP as acceptor	cell part;cell projection;cytoplasmic part;cytosol;intracellular membrane-bounded organelle;intracellular organelle;intracellular part;membrane-bounded organelle;mitochondrion;neuron projection;organelle	Folate biosynthesis	1	0.000723089	105.03	100.55	-1.2908	903250000
P49429;F6X9Z6	297;29	P49429	4-hydroxyphenylpyruvate dioxygenase	Hpd;Hpd	RERGTEFLAAPSSYYKLLRENLKSAKIQVKE	NaN		#VALUE!	NaN	NaN	0.0556085		2	___1	amine catabolic process;amine metabolic process;aromatic amino acid family catabolic process;aromatic amino acid family metabolic process;aromatic compound catabolic process;carboxylic acid catabolic process;carboxylic acid metabolic process;catabolic process;cellular amine metabolic process;cellular amino acid catabolic process;cellular amino acid metabolic process;cellular aromatic compound met…	4-hydroxyphenylpyruvate dioxygenase activity;binding;catalytic activity;cation binding;dioxygenase activity;ion binding;metal ion binding;oxidoreductase activity;oxidoreductase activity, acting on single donors with incorporation of molecular oxygen;oxidoreductase activity, acting on single donors with incorporation of molecular oxygen, incorporation of two atoms of oxygen	cell part;cytoplasmic part;endoplasmic reticulum membrane;endoplasmic reticulum part;Golgi apparatus part;Golgi membrane;intracellular organelle part;intracellular part;membrane;membrane part;organelle membrane;organelle part	Phenylalanine metabolism;Tyrosine metabolism;Ubiquinone and other terpenoid-quinone biosynthesis	1	6.37e-21	131.24	123.72	0.69183	253110000
E9QPD7;G5E8R3;Q05920;E9PW11	993;992;992;787	E9QPD7	Pyruvate carboxylase;Pyruvate carboxylase;Pyruvate carboxylase, mitochondrial	Pcx;Pcx;Pc;Pcx	RPGASLPPLNLKELEKDLIDRHGEEVTPEDV	NaN		#VALUE!	NaN	-0.0834604	0.0537694		4	___1	alcohol biosynthetic process;alcohol metabolic process;biosynthetic process;carbohydrate biosynthetic process;carbohydrate metabolic process;carboxylic acid metabolic process;cellular biosynthetic process;cellular carbohydrate biosynthetic process;cellular carbohydrate metabolic process;cellular ketone metabolic process;cellular metabolic process;cellular process;dicarboxylic acid metabolic proce…	adenyl nucleotide binding;adenyl ribonucleotide binding;ATP binding;binding;biotin binding;biotin carboxylase activity;carboxylic acid binding;catalytic activity;cation binding;DNA binding;ion binding;ligase activity;ligase activity, forming carbon-carbon bonds;ligase activity, forming carbon-nitrogen bonds;metal ion binding;monocarboxylic acid binding;nucleic acid binding;nucleotide binding;puri…	cell part;cytoplasmic part;intracellular organelle lumen;intracellular organelle part;intracellular part;membrane;membrane-enclosed lumen;mitochondrial inner membrane;mitochondrial matrix;mitochondrial membrane;mitochondrial part;organelle inner membrane;organelle lumen;organelle membrane;organelle part	Citrate cycle (TCA cycle);Pyruvate metabolism	1	5.77e-50	167.93	125.71	1.8678	10514000000
Q61937;Q5SQB0;E9Q5T3	265;237;257	Q61937	Nucleophosmin	Npm1;Npm1;Gm5611	QASIEKGGSLPKVEAKFINYVKNCFRMTDQE	NaN		#VALUE!	NaN	-0.0606855	0.0504977		2	___1	aging;biological regulation;cell aging;cell cycle process;cell growth;cell volume homeostasis;cellular component assembly;cellular component biogenesis;cellular component biogenesis at cellular level;cellular component organization;cellular component organization at cellular level;cellular component organization or biogenesis;cellular component organization or biogenesis at cellular level;cellula…	binding;DNA binding;lipid binding;NF-kappaB binding;nucleic acid binding;phosphatidylinositol binding;phosphatidylinositol-3,4,5-trisphosphate binding;phospholipid binding;protein binding;ribonucleoprotein binding;ribosomal large subunit binding;ribosomal small subunit binding;RNA binding;rRNA binding;transcription factor binding;unfolded protein binding	cell part;centrosome;cytoplasmic part;cytoskeletal part;cytosol;granular component;intracellular non-membrane-bounded organelle;intracellular organelle;intracellular organelle part;intracellular part;large ribosomal subunit;macromolecular complex;microtubule organizing center;non-membrane-bounded organelle;nuclear body;nuclear part;nuclear speck;nucleolar part;nucleoplasm part;organelle;organelle…		1	7.17e-07	128.01	91.584	-0.84081	369930000
Q6P8N8;Q9JHS4	462;476	Q6P8N8;Q9JHS4	ATP-dependent Clp protease ATP-binding subunit clpX-like, mitochondrial	Clpx;Clpx	ANRSGESNTHQDIEEKDRLLRHVEARDLIEF	NaN		#VALUE!	NaN	0.892137	0.0489145		3	___1	cellular macromolecule metabolic process;cellular metabolic process;cellular process;cellular protein metabolic process;macromolecule metabolic process;metabolic process;primary metabolic process;protein folding;protein metabolic process;proteolysis;proteolysis involved in cellular protein catabolic process	adenyl nucleotide binding;adenyl ribonucleotide binding;ATP binding;ATPase activity;ATPase activity, coupled;ATP-dependent peptidase activity;binding;catalytic activity;cation binding;enzyme activator activity;enzyme regulator activity;hydrolase activity;hydrolase activity, acting on acid anhydrides;hydrolase activity, acting on acid anhydrides, in phosphorus-containing anhydrides;ion binding;met…	cell part;cytoplasmic part;endopeptidase Clp complex;intracellular membrane-bounded organelle;intracellular non-membrane-bounded organelle;intracellular organelle;intracellular organelle part;intracellular part;macromolecular complex;membrane;membrane-bounded organelle;mitochondrial endopeptidase Clp complex;mitochondrial inner membrane;mitochondrial membrane;mitochondrial nucleoid;mitochondrial …	Cell cycle - Caulobacter	1	4.23e-18	142.97	101.39	0.43833	92747000
E9QPD7;G5E8R3;Q05920;E9PW11	1091;1090;1090;885	E9QPD7	Pyruvate carboxylase;Pyruvate carboxylase;Pyruvate carboxylase, mitochondrial	Pcx;Pcx;Pc;Pcx	QVFFELNGQLRSILVKDTQAMKEMHFHPKAL	NaN		#VALUE!	NaN	-0.0834604	0.0352427		2	___1	alcohol biosynthetic process;alcohol metabolic process;biosynthetic process;carbohydrate biosynthetic process;carbohydrate metabolic process;carboxylic acid metabolic process;cellular biosynthetic process;cellular carbohydrate biosynthetic process;cellular carbohydrate metabolic process;cellular ketone metabolic process;cellular metabolic process;cellular process;dicarboxylic acid metabolic proce…	adenyl nucleotide binding;adenyl ribonucleotide binding;ATP binding;binding;biotin binding;biotin carboxylase activity;carboxylic acid binding;catalytic activity;cation binding;DNA binding;ion binding;ligase activity;ligase activity, forming carbon-carbon bonds;ligase activity, forming carbon-nitrogen bonds;metal ion binding;monocarboxylic acid binding;nucleic acid binding;nucleotide binding;puri…	cell part;cytoplasmic part;intracellular organelle lumen;intracellular organelle part;intracellular part;membrane;membrane-enclosed lumen;mitochondrial inner membrane;mitochondrial matrix;mitochondrial membrane;mitochondrial part;organelle inner membrane;organelle lumen;organelle membrane;organelle part	Citrate cycle (TCA cycle);Pyruvate metabolism	1	2.98e-18	164.81	75.819	1.4681	681750000
P56395;G5E850;E0CY88	77;77;53	P56395	Cytochrome b5	Cyb5a;Cyb5;Cyb5	NFEDVGHSTDARELSKTYIIGELHPDDRSKI	NaN		#VALUE!	NaN	-0.0589318	0.034931		3	___1	carboxylic acid metabolic process;cellular ketone metabolic process;cellular lipid metabolic process;cellular metabolic process;cellular process;electron transport chain;fatty acid metabolic process;generation of precursor metabolites and energy;lipid metabolic process;metabolic process;monocarboxylic acid metabolic process;organic acid metabolic process;oxidation-reduction process;oxoacid metabo…	binding;catalytic activity;cation binding;CoA desaturase activity;heme binding;ion binding;iron ion binding;metal ion binding;oxidoreductase activity;oxidoreductase activity, acting on paired donors, with incorporation or reduction of molecular oxygen;oxidoreductase activity, acting on paired donors, with oxidation of a pair of donors resulting in the reduction of molecular oxygen to two molecule…	cell part;cytoplasmic part;endoplasmic reticulum membrane;endoplasmic reticulum part;integral to membrane;intracellular membrane-bounded organelle;intracellular organelle;intracellular organelle part;intracellular part;intrinsic to membrane;membrane;membrane part;membrane-bounded organelle;mitochondrion;organelle;organelle membrane;organelle part		1	3.02e-92	204.71	94.544	0.78405	854190000
Q9JJL8	110	Q9JJL8	Serine--tRNA ligase, mitochondrial	Sars2	ELRQLREQIRSLEAEKEAVAEAVRALLANQD	NaN		#VALUE!	NaN	-0.294405	0.014139		2	___1	amine metabolic process;amino acid activation;carboxylic acid metabolic process;cellular amine metabolic process;cellular amino acid metabolic process;cellular ketone metabolic process;cellular macromolecule metabolic process;cellular metabolic process;cellular nitrogen compound metabolic process;cellular process;macromolecule metabolic process;metabolic process;ncRNA metabolic process;nitrogen c…	adenyl nucleotide binding;adenyl ribonucleotide binding;aminoacyl-tRNA ligase activity;ATP binding;binding;catalytic activity;ligase activity;ligase activity, forming aminoacyl-tRNA and related compounds;ligase activity, forming carbon-oxygen bonds;nucleotide binding;purine nucleotide binding;purine ribonucleoside triphosphate binding;purine ribonucleotide binding;ribonucleotide binding;serine-tR…	cell part;cytoplasmic part;intracellular membrane-bounded organelle;intracellular organelle;intracellular organelle lumen;intracellular organelle part;intracellular part;membrane-bounded organelle;membrane-enclosed lumen;mitochondrial matrix;mitochondrial part;mitochondrion;organelle;organelle lumen;organelle part	Aminoacyl-tRNA biosynthesis	1	1.75e-42	178.14	178.14	-1.178	110840000
Q80X68;Q9CZU6	370;370	Q80X68;Q9CZU6	Citrate synthase;Citrate synthase, mitochondrial	Csl;Cs	PRYSCQREFALKHLPKDPMFKLVAQLYKIVP;PRYSCQREFALKHLPKDPMFKLVGQLYKIVP	NaN		#VALUE!	NaN	NaN	-0.0048		2	___1	acetyl-CoA catabolic process;acetyl-CoA metabolic process;carbohydrate metabolic process;catabolic process;cellular carbohydrate metabolic process;cellular catabolic process;cellular metabolic process;cellular process;coenzyme catabolic process;coenzyme metabolic process;cofactor catabolic process;cofactor metabolic process;metabolic process;primary metabolic process;tricarboxylic acid cycle	catalytic activity;citrate (Si)-synthase activity;transferase activity;transferase activity, transferring acyl groups;transferase activity, transferring acyl groups, acyl groups converted into alkyl on transfer	cell part;cytoplasmic part;intracellular membrane-bounded organelle;intracellular organelle;intracellular organelle lumen;intracellular organelle part;intracellular part;membrane-bounded organelle;membrane-enclosed lumen;mitochondrial matrix;mitochondrial part;mitochondrion;organelle;organelle lumen;organelle part	Citrate cycle (TCA cycle);Glyoxylate and dicarboxylate metabolism	1	0.00224926	85.958	77.379	-0.27392	54974000
P62827;Q14AA6;Q61820	60;60;60	P62827	GTP-binding nuclear protein Ran;GTP-binding nuclear protein Ran, testis-specific isoform	Ran;1700009N14Rik;Rasl2-9	VEVHPLVFHTNRGPIKFNVWDTAGQEKFGGL	NaN		#VALUE!	NaN	0.304162	-0.0125803		2	___1	actin cytoskeleton organization;actin filament-based process;biological regulation;cell cycle phase;cell cycle process;cell division;cellular component organization;cellular component organization at cellular level;cellular component organization or biogenesis;cellular component organization or biogenesis at cellular level;cellular localization;cellular macromolecule localization;cellular process…	binding;catalytic activity;GTP binding;GTPase activity;guanyl nucleotide binding;guanyl ribonucleotide binding;hydrolase activity;hydrolase activity, acting on acid anhydrides;hydrolase activity, acting on acid anhydrides, in phosphorus-containing anhydrides;nucleoside-triphosphatase activity;nucleotide binding;purine nucleotide binding;purine ribonucleoside triphosphate binding;purine ribonucleo…	cell part;cytoplasm;cytoplasmic membrane-bounded vesicle;cytoplasmic part;cytoplasmic vesicle;intracellular membrane-bounded organelle;intracellular organelle;intracellular part;melanosome;membrane-bounded organelle;membrane-bounded vesicle;nucleus;organelle;pigment granule;vesicle	Ribosome biogenesis in eukaryotes;RNA transport	1	5.73e-27	162.76	86.497	-1.4025	173230000
Q9DCX2;G3X9L6;B1ASE2	63;63;63	Q9DCX2	ATP synthase subunit d, mitochondrial	Atp5h;Gm10250;Atp5h	KPPAIDWAYYRANVAKPGLVDDFEKKYNALK	NaN		#VALUE!	NaN	-0.0635515	-0.044512		3	___1	ATP biosynthetic process;ATP metabolic process;ATP synthesis coupled proton transport;biosynthetic process;cation transport;cellular biosynthetic process;cellular metabolic process;cellular nitrogen compound biosynthetic process;cellular nitrogen compound metabolic process;cellular process;energy coupled proton transport, down electrochemical gradient;establishment of localization;heterocycle bio…	cation transmembrane transporter activity;hydrogen ion transmembrane transporter activity;inorganic cation transmembrane transporter activity;ion transmembrane transporter activity;monovalent inorganic cation transmembrane transporter activity;substrate-specific transmembrane transporter activity;substrate-specific transporter activity;transmembrane transporter activity;transporter activity	cell part;cytoplasmic part;intracellular organelle part;intracellular part;macromolecular complex;membrane;membrane part;mitochondrial inner membrane;mitochondrial membrane;mitochondrial membrane part;mitochondrial part;mitochondrial proton-transporting ATP synthase complex;mitochondrial proton-transporting ATP synthase complex, coupling factor F(o);organelle inner membrane;organelle membrane;org…	Alzheimer's disease;Huntington's disease;Oxidative phosphorylation;Parkinson's disease	1	1.5e-15	122.93	122.93	-0.55503	329020000
Q9D0F9;A2CEK3	457;475	Q9D0F9	Phosphoglucomutase-1	Pgm1;Pgm2	MKDLEALMLDRSFVGKQFSANDKVYTVEKAD	NaN		#VALUE!	NaN	-0.0731067	-0.050002		2	___1	alcohol catabolic process;alcohol metabolic process;biosynthetic process;carbohydrate biosynthetic process;carbohydrate catabolic process;carbohydrate metabolic process;catabolic process;cellular biosynthetic process;cellular carbohydrate biosynthetic process;cellular carbohydrate catabolic process;cellular carbohydrate metabolic process;cellular glucan metabolic process;cellular macromolecule bi…	binding;catalytic activity;cation binding;intramolecular transferase activity;intramolecular transferase activity, phosphotransferases;ion binding;isomerase activity;magnesium ion binding;metal ion binding;phosphoglucomutase activity	cell part;cytoplasmic part;cytosol;intracellular part	Amino sugar and nucleotide sugar metabolism;Galactose metabolism;Glycolysis / Gluconeogenesis;Pentose phosphate pathway;Purine metabolism;Starch and sucrose metabolism;Streptomycin biosynthesis	1	6.57e-26	171.2	153.81	-0.21192	444730000
P10853;Q8CGP2-2;Q921L4;Q8CBB6;Q64475;Q8CGP1;Q8CGP2;P70696;Q64524;Q6ZWY9;Q64478;P10854;Q64525;Q8CGP0;Q9D2U9	109;109;109;109;109;109;109;110;109;109;109;109;109;109;109	P10853;Q64524;Q6ZWY9;Q8CGP0;Q9D2U9	Histone H2B type 1-F/J/L;Histone H2B;Histone H2B;Histone H2B type 1-B;Histone H2B type 1-K;Histone H2B type 1-P;Histone H2B type 1-A;Histone H2B type 2-E;Histone H2B type 1-C/E/G;Histone H2B type 1-H;Histone H2B type 1-M;Histone H2B type 2-B;Histone H2B type 3-B;Histone H2B type 3-A	Hist1h2bf;Gm13646;Gm13646;Hist1h2bb;Hist1h2bk;Hist1h2bp;Hist1h2ba;Hist2h2be;Hist1h2bc;Hist1h2bh;Hist1h2bm;Hist2h2bb;Hist3h2bb;Hist3h2ba	EIQTAVRLLLPGELAKHAVSEGTKAVTKYTS;EIQTSVRLLLPGELAKHAVSEGTKAVTKYTS;EVQTAVRLLLPGELAKHAVSEGTKAVTKYTS	NaN		#VALUE!	NaN	1.37417	-0.0646872		2	___1	biological regulation;cell migration;cell motility;cellular component assembly;cellular component assembly at cellular level;cellular component movement;cellular component organization;cellular component organization at cellular level;cellular component organization or biogenesis;cellular component organization or biogenesis at cellular level;cellular macromolecular complex assembly;cellular macr…	binding;DNA binding;nucleic acid binding	cell part;chromosomal part;extrinsic to membrane;extrinsic to plasma membrane;intracellular membrane-bounded organelle;intracellular organelle;intracellular organelle part;intracellular part;macromolecular complex;membrane part;membrane-bounded organelle;nucleosome;nucleus;organelle;organelle part;plasma membrane part;protein-DNA complex	Systemic lupus erythematosus	1	1.9e-30	137.14	134.33	-1.8422	4211100000
Q9CZ42;Q9CZ42-3;Q9CZ42-2	224;208;179	Q9CZ42;Q9CZ42-2	ATP-dependent (S)-NAD(P)H-hydrate dehydratase	Carkd	LWEAVLSSPMDSNDLKGSTLKLSQALGNITV	NaN		#VALUE!	NaN	NaN	-0.146185		2	___1	cellular metabolic process;cellular nitrogen compound metabolic process;cellular process;coenzyme metabolic process;cofactor metabolic process;heterocycle metabolic process;metabolic process;nicotinamide nucleotide metabolic process;nitrogen compound metabolic process;nucleobase-containing compound metabolic process;nucleobase-containing small molecule metabolic process;nucleoside phosphate metab…	adenyl nucleotide binding;adenyl ribonucleotide binding;ATP binding;ATP-dependent NAD(P)H-hydrate dehydratase activity;binding;carbon-oxygen lyase activity;catalytic activity;hydro-lyase activity;lyase activity;nucleotide binding;purine nucleotide binding;purine ribonucleoside triphosphate binding;purine ribonucleotide binding;ribonucleotide binding	cell part;cytoplasmic part;intracellular membrane-bounded organelle;intracellular organelle;intracellular part;membrane-bounded organelle;mitochondrion;organelle		1	6e-100	199.61	90.968	0.20168	2483200000
D3YWR7;D3Z1A1;Q8BVI4	69;121;121	D3YWR7;D3Z1A1;Q8BVI4	Dihydropteridine reductase	Qdpr;Qdpr;Qdpr	KQSMWTSTISSHLATKHLKEGGLLTLAGAKA	NaN		#VALUE!	NaN	NaN	-0.162899		3	___1	amine catabolic process;amine metabolic process;anatomical structure development;aromatic amino acid family catabolic process;aromatic amino acid family metabolic process;aromatic compound biosynthetic process;aromatic compound catabolic process;biosynthetic process;carboxylic acid catabolic process;carboxylic acid metabolic process;catabolic process;cellular amine metabolic process;cellular amin…	6,7-dihydropteridine reductase activity;binding;catalytic activity;coenzyme binding;cofactor binding;NAD binding;NADH binding;NADP binding;NADPH binding;nucleotide binding;oxidoreductase activity;oxidoreductase activity, acting on the CH-NH group of donors;oxidoreductase activity, acting on the CH-NH group of donors, NAD or NADP as acceptor	cell part;cell projection;cytoplasmic part;cytosol;intracellular membrane-bounded organelle;intracellular organelle;intracellular part;membrane-bounded organelle;mitochondrion;neuron projection;organelle	Folate biosynthesis	1	4.37e-09	120.31	92.474	0.43886	140630000
Q9DCX2;G3X9L6;B1ASE2	85;85;85	Q9DCX2	ATP synthase subunit d, mitochondrial	Atp5h;Gm10250;Atp5h	FEKKYNALKIPVPEDKYTALVDQEEKEDVKS	NaN		#VALUE!	NaN	-0.0635515	-0.177507		3	___2	ATP biosynthetic process;ATP metabolic process;ATP synthesis coupled proton transport;biosynthetic process;cation transport;cellular biosynthetic process;cellular metabolic process;cellular nitrogen compound biosynthetic process;cellular nitrogen compound metabolic process;cellular process;energy coupled proton transport, down electrochemical gradient;establishment of localization;heterocycle bio…	cation transmembrane transporter activity;hydrogen ion transmembrane transporter activity;inorganic cation transmembrane transporter activity;ion transmembrane transporter activity;monovalent inorganic cation transmembrane transporter activity;substrate-specific transmembrane transporter activity;substrate-specific transporter activity;transmembrane transporter activity;transporter activity	cell part;cytoplasmic part;intracellular organelle part;intracellular part;macromolecular complex;membrane;membrane part;mitochondrial inner membrane;mitochondrial membrane;mitochondrial membrane part;mitochondrial part;mitochondrial proton-transporting ATP synthase complex;mitochondrial proton-transporting ATP synthase complex, coupling factor F(o);organelle inner membrane;organelle membrane;org…	Alzheimer's disease;Huntington's disease;Oxidative phosphorylation;Parkinson's disease	1	3.37e-232	319.86	127.58	-0.88896	29708000000
Q9DCX2;G3X9L6;B1ASE2	95;95;95	Q9DCX2	ATP synthase subunit d, mitochondrial	Atp5h;Gm10250;Atp5h	PVPEDKYTALVDQEEKEDVKSCAEFVSGSQL	NaN		#VALUE!	NaN	-0.0635515	-0.177507		2	___2	ATP biosynthetic process;ATP metabolic process;ATP synthesis coupled proton transport;biosynthetic process;cation transport;cellular biosynthetic process;cellular metabolic process;cellular nitrogen compound biosynthetic process;cellular nitrogen compound metabolic process;cellular process;energy coupled proton transport, down electrochemical gradient;establishment of localization;heterocycle bio…	cation transmembrane transporter activity;hydrogen ion transmembrane transporter activity;inorganic cation transmembrane transporter activity;ion transmembrane transporter activity;monovalent inorganic cation transmembrane transporter activity;substrate-specific transmembrane transporter activity;substrate-specific transporter activity;transmembrane transporter activity;transporter activity	cell part;cytoplasmic part;intracellular organelle part;intracellular part;macromolecular complex;membrane;membrane part;mitochondrial inner membrane;mitochondrial membrane;mitochondrial membrane part;mitochondrial part;mitochondrial proton-transporting ATP synthase complex;mitochondrial proton-transporting ATP synthase complex, coupling factor F(o);organelle inner membrane;organelle membrane;org…	Alzheimer's disease;Huntington's disease;Oxidative phosphorylation;Parkinson's disease	1	4.69e-168	230.16	100.45	0.2223	14707000000
Q925I1	490	Q925I1	ATPase family AAA domain-containing protein 3	Atad3	PQREERERLVRMYFDKYVLKPATEGKQRLKV	NaN		#VALUE!	NaN	-0.297056	-0.180066		2	___1		adenyl nucleotide binding;adenyl ribonucleotide binding;ATP binding;binding;catalytic activity;hydrolase activity;hydrolase activity, acting on acid anhydrides;hydrolase activity, acting on acid anhydrides, in phosphorus-containing anhydrides;nucleoside-triphosphatase activity;nucleotide binding;purine nucleotide binding;purine ribonucleoside triphosphate binding;purine ribonucleotide binding;pyr…	cell part;cytoplasmic part;integral to membrane;intracellular non-membrane-bounded organelle;intracellular organelle;intracellular organelle part;intracellular part;intrinsic to membrane;membrane;membrane part;mitochondrial inner membrane;mitochondrial membrane;mitochondrial nucleoid;mitochondrial part;non-membrane-bounded organelle;nucleoid;organelle;organelle inner membrane;organelle membrane;o…		1	4.43e-59	186.43	186.43	-0.67568	3107700000
P56395;G5E850	39;39	P56395	Cytochrome b5	Cyb5a;Cyb5	KSTWVILHHKVYDLTKFLEEHPGGEEVLREQ	NaN		#VALUE!	NaN	-0.0589318	-0.213029		3	___1	carboxylic acid metabolic process;cellular ketone metabolic process;cellular lipid metabolic process;cellular metabolic process;cellular process;electron transport chain;fatty acid metabolic process;generation of precursor metabolites and energy;lipid metabolic process;metabolic process;monocarboxylic acid metabolic process;organic acid metabolic process;oxidation-reduction process;oxoacid metabo…	binding;catalytic activity;cation binding;CoA desaturase activity;heme binding;ion binding;iron ion binding;metal ion binding;oxidoreductase activity;oxidoreductase activity, acting on paired donors, with incorporation or reduction of molecular oxygen;oxidoreductase activity, acting on paired donors, with oxidation of a pair of donors resulting in the reduction of molecular oxygen to two molecule…	cell part;cytoplasmic part;endoplasmic reticulum membrane;endoplasmic reticulum part;integral to membrane;intracellular membrane-bounded organelle;intracellular organelle;intracellular organelle part;intracellular part;intrinsic to membrane;membrane;membrane part;membrane-bounded organelle;mitochondrion;organelle;organelle membrane;organelle part		1	2.95e-102	219.79	164.59	0.27028	2197300000
Q9DCX2;G3X9L6	149;148	Q9DCX2	ATP synthase subunit d, mitochondrial	Atp5h;Gm10250	DDLNEIFPETKLDKKKYPYWPHQPIENL___	NaN		#VALUE!	NaN	-0.0635515	-0.229252		2	___1	ATP biosynthetic process;ATP metabolic process;ATP synthesis coupled proton transport;biosynthetic process;cation transport;cellular biosynthetic process;cellular metabolic process;cellular nitrogen compound biosynthetic process;cellular nitrogen compound metabolic process;cellular process;energy coupled proton transport, down electrochemical gradient;establishment of localization;heterocycle bio…	cation transmembrane transporter activity;hydrogen ion transmembrane transporter activity;inorganic cation transmembrane transporter activity;ion transmembrane transporter activity;monovalent inorganic cation transmembrane transporter activity;substrate-specific transmembrane transporter activity;substrate-specific transporter activity;transmembrane transporter activity;transporter activity	cell part;cytoplasmic part;intracellular organelle part;intracellular part;macromolecular complex;membrane part;mitochondrial membrane part;mitochondrial part;mitochondrial proton-transporting ATP synthase complex;mitochondrial proton-transporting ATP synthase complex, coupling factor F(o);organelle part;protein complex;proton-transporting ATP synthase complex;proton-transporting ATP synthase com…	Alzheimer's disease;Huntington's disease;Oxidative phosphorylation;Parkinson's disease	0.826978	7e-17	150.26	145.52	0.31683	875150000
Q9CZ42;Q9CZ42-3;Q9CZ42-2	136;120;91	Q9CZ42;Q9CZ42-2	ATP-dependent (S)-NAD(P)H-hydrate dehydratase	Carkd	VHPVLDSSNAVEEVEKWLPRLHALVVGPGLG	NaN		#VALUE!	NaN	NaN	-0.232124		3	___1	cellular metabolic process;cellular nitrogen compound metabolic process;cellular process;coenzyme metabolic process;cofactor metabolic process;heterocycle metabolic process;metabolic process;nicotinamide nucleotide metabolic process;nitrogen compound metabolic process;nucleobase-containing compound metabolic process;nucleobase-containing small molecule metabolic process;nucleoside phosphate metab…	adenyl nucleotide binding;adenyl ribonucleotide binding;ATP binding;ATP-dependent NAD(P)H-hydrate dehydratase activity;binding;carbon-oxygen lyase activity;catalytic activity;hydro-lyase activity;lyase activity;nucleotide binding;purine nucleotide binding;purine ribonucleoside triphosphate binding;purine ribonucleotide binding;ribonucleotide binding	cell part;cytoplasmic part;intracellular membrane-bounded organelle;intracellular organelle;intracellular part;membrane-bounded organelle;mitochondrion;organelle		1	1.04e-31	131.43	102.95	-0.064253	615430000
Q9Z2A0;F2Z3X6;F2Z3Z9;Q3TRL2;F2Z400	307;280;180;307;307	Q9Z2A0	3-phosphoinositide-dependent protein kinase 1	Pdpk1;Pdpk1;Pdpk1;Pdpk1;Pdpk1	LIFQKIIKLEYHFPEKFFPKARDLVEKLLVL	NaN		#VALUE!	0.313078	NaN	-0.254485		3	___1	activation of protein kinase activity;activation of protein kinase B activity;anatomical structure development;biological regulation;biosynthetic process;cell development;cell junction assembly;cell junction organization;cell-substrate junction assembly;cellular biosynthetic process;cellular component assembly;cellular component assembly at cellular level;cellular component organization;cellular …	3-phosphoinositide-dependent protein kinase activity;adenyl nucleotide binding;adenyl ribonucleotide binding;ATP binding;binding;catalytic activity;kinase activity;nucleotide binding;phosphotransferase activity, alcohol group as acceptor;protein kinase activity;protein serine/threonine kinase activity;purine nucleotide binding;purine ribonucleoside triphosphate binding;purine ribonucleotide bindi…	adherens junction;anchoring junction;cell junction;cell part;cell-substrate adherens junction;cell-substrate junction;cytoplasmic membrane-bounded vesicle;cytoplasmic part;cytoplasmic vesicle;cytosol;focal adhesion;intracellular membrane-bounded organelle;intracellular organelle;intracellular part;membrane;membrane-bounded organelle;membrane-bounded vesicle;nucleus;organelle;plasma membrane;vesic…	Aldosterone-regulated sodium reabsorption;Endometrial cancer;Focal adhesion;Insulin signaling pathway;mTOR signaling pathway;Non-small cell lung cancer;PPAR signaling pathway;Prostate cancer	1	3.3e-05	120.84	96.745	-0.11631	1141500000
Q9DCX2;G3X9L6;B1ASE2	72;72;72	Q9DCX2	ATP synthase subunit d, mitochondrial	Atp5h;Gm10250;Atp5h	YRANVAKPGLVDDFEKKYNALKIPVPEDKYT	NaN		#VALUE!	NaN	-0.0635515	-0.263983		2	___1	ATP biosynthetic process;ATP metabolic process;ATP synthesis coupled proton transport;biosynthetic process;cation transport;cellular biosynthetic process;cellular metabolic process;cellular nitrogen compound biosynthetic process;cellular nitrogen compound metabolic process;cellular process;energy coupled proton transport, down electrochemical gradient;establishment of localization;heterocycle bio…	cation transmembrane transporter activity;hydrogen ion transmembrane transporter activity;inorganic cation transmembrane transporter activity;ion transmembrane transporter activity;monovalent inorganic cation transmembrane transporter activity;substrate-specific transmembrane transporter activity;substrate-specific transporter activity;transmembrane transporter activity;transporter activity	cell part;cytoplasmic part;intracellular organelle part;intracellular part;macromolecular complex;membrane;membrane part;mitochondrial inner membrane;mitochondrial membrane;mitochondrial membrane part;mitochondrial part;mitochondrial proton-transporting ATP synthase complex;mitochondrial proton-transporting ATP synthase complex, coupling factor F(o);organelle inner membrane;organelle membrane;org…	Alzheimer's disease;Huntington's disease;Oxidative phosphorylation;Parkinson's disease	1	8.89e-59	238.01	221.5	-0.68856	29633000000
D3Z1B2	72	D3Z1B2		Gm4953	YKASVAKPGLVDDFEKKYNTLKIPVPEDKYT	NaN		#VALUE!	NaN	NaN	-0.279418		2	___1	ATP biosynthetic process;ATP metabolic process;ATP synthesis coupled proton transport;biosynthetic process;cation transport;cellular biosynthetic process;cellular metabolic process;cellular nitrogen compound biosynthetic process;cellular nitrogen compound metabolic process;cellular process;energy coupled proton transport, down electrochemical gradient;establishment of localization;heterocycle bio…	cation transmembrane transporter activity;hydrogen ion transmembrane transporter activity;inorganic cation transmembrane transporter activity;ion transmembrane transporter activity;monovalent inorganic cation transmembrane transporter activity;substrate-specific transmembrane transporter activity;substrate-specific transporter activity;transmembrane transporter activity;transporter activity	cell part;cytoplasmic part;intracellular organelle part;intracellular part;macromolecular complex;membrane part;mitochondrial membrane part;mitochondrial part;mitochondrial proton-transporting ATP synthase complex, coupling factor F(o);organelle part;protein complex;proton-transporting ATP synthase complex, coupling factor F(o);proton-transporting two-sector ATPase complex, proton-transporting do…		1	1.55e-43	238.01	221.5	-0.68856	19580000000
Q9DB20	192	Q9DB20	ATP synthase subunit O, mitochondrial	Atp5o	TDPSIMGGMIVRIGEKYVDMSAKSKIQKLSK	NaN		#VALUE!	NaN	0.0710814	-0.298707		2	___1	ATP biosynthetic process;ATP metabolic process;ATP synthesis coupled proton transport;biosynthetic process;cation transport;cellular biosynthetic process;cellular metabolic process;cellular nitrogen compound biosynthetic process;cellular nitrogen compound metabolic process;cellular process;energy coupled proton transport, down electrochemical gradient;establishment of localization;establishment o…	binding;cation transmembrane transporter activity;drug binding;hydrogen ion transmembrane transporter activity;hydrogen ion transporting ATP synthase activity, rotational mechanism;inorganic cation transmembrane transporter activity;ion transmembrane transporter activity;lipid binding;monovalent inorganic cation transmembrane transporter activity;steroid binding;substrate-specific transmembrane t…	cell part;cytoplasmic part;intracellular organelle part;intracellular part;macromolecular complex;membrane;membrane part;mitochondrial membrane part;mitochondrial part;mitochondrial proton-transporting ATP synthase complex;mitochondrial proton-transporting ATP synthase complex, coupling factor F(o);organelle part;plasma membrane;protein complex;proton-transporting ATP synthase complex;proton-tran…	Alzheimer's disease;Huntington's disease;Oxidative phosphorylation;Parkinson's disease	1	3.25e-05	123.95	100.55	-1.0342	296130000
Q9D0F9;A2CEK3	419;437	Q9D0F9	Phosphoglucomutase-1	Pgm1;Pgm2	TRKQSVEDILKDHWQKFGRNFFTRYDYEEVE	NaN		#VALUE!	NaN	-0.0731067	-0.31138		2	___1	alcohol catabolic process;alcohol metabolic process;biosynthetic process;carbohydrate biosynthetic process;carbohydrate catabolic process;carbohydrate metabolic process;catabolic process;cellular biosynthetic process;cellular carbohydrate biosynthetic process;cellular carbohydrate catabolic process;cellular carbohydrate metabolic process;cellular glucan metabolic process;cellular macromolecule bi…	binding;catalytic activity;cation binding;intramolecular transferase activity;intramolecular transferase activity, phosphotransferases;ion binding;isomerase activity;magnesium ion binding;metal ion binding;phosphoglucomutase activity	cell part;cytoplasmic part;cytosol;intracellular part	Amino sugar and nucleotide sugar metabolism;Galactose metabolism;Glycolysis / Gluconeogenesis;Pentose phosphate pathway;Purine metabolism;Starch and sucrose metabolism;Streptomycin biosynthesis	1	0.00224828	119.86	85.064	0.57363	345130000
D3Z2H9;E9Q5J9;Q8K0Z5;P21107-2	223;260;259;223	D3Z2H9;E9Q5J9;P21107-2		Tpm3-rs7;Tpm3;Tpm3	RSVAKLEKTIDDLEDKLKCTKEEHLCTQRML	NaN		#VALUE!	NaN	NaN	-0.328275		2	___1	actin filament-based movement;actin filament-based process;actin-mediated cell contraction;actin-myosin filament sliding;anatomical structure development;biological regulation;brain development;cell projection organization;cellular component movement;cellular component organization;cellular component organization at cellular level;cellular component organization or biogenesis;cellular component o…		actin filament bundle;actomyosin;cell cortex part;cell part;cell projection part;cortical cytoskeleton;cytoplasmic part;cytoskeletal part;cytoskeleton;growth cone;intracellular non-membrane-bounded organelle;intracellular organelle;intracellular organelle part;intracellular part;macromolecular complex;non-membrane-bounded organelle;organelle;organelle part;podosome;protein complex;site of polariz…	Cardiac muscle contraction;Dilated cardiomyopathy;Hypertrophic cardiomyopathy (HCM);Pathways in cancer;Thyroid cancer	1	0.000767962	77.062	77.062	0.85014	45278000
Q9DB20;D3Z4J0;F6XVM5	60;60;57	Q9DB20	ATP synthase subunit O, mitochondrial	Atp5o;Gm5436;Atp5o	LYSAASKEKKLDQVEKELLRVGQLLKDPKVS	NaN		#VALUE!	NaN	0.0710814	-0.357982		2	___1	ATP biosynthetic process;ATP metabolic process;ATP synthesis coupled proton transport;biosynthetic process;cation transport;cellular biosynthetic process;cellular metabolic process;cellular nitrogen compound biosynthetic process;cellular nitrogen compound metabolic process;cellular process;energy coupled proton transport, down electrochemical gradient;establishment of localization;establishment o…	binding;cation transmembrane transporter activity;drug binding;hydrogen ion transmembrane transporter activity;hydrogen ion transporting ATP synthase activity, rotational mechanism;inorganic cation transmembrane transporter activity;ion transmembrane transporter activity;lipid binding;monovalent inorganic cation transmembrane transporter activity;steroid binding;substrate-specific transmembrane t…	cell part;cytoplasmic part;intracellular membrane-bounded organelle;intracellular organelle;intracellular organelle part;intracellular part;macromolecular complex;membrane;membrane part;membrane-bounded organelle;mitochondrial membrane part;mitochondrial part;mitochondrial proton-transporting ATP synthase complex;mitochondrial proton-transporting ATP synthase complex, coupling factor F(o);mitocho…	Alzheimer's disease;Huntington's disease;Oxidative phosphorylation;Parkinson's disease	1	7.9e-33	197.07	109.24	1.4439	5791900000
Q9D0F9;A2CEK3	443;461	Q9D0F9	Phosphoglucomutase-1	Pgm1;Pgm2	YDYEEVEAEGANKMMKDLEALMLDRSFVGKQ	NaN		#VALUE!	NaN	-0.0731067	-0.358618		2	___1	alcohol catabolic process;alcohol metabolic process;biosynthetic process;carbohydrate biosynthetic process;carbohydrate catabolic process;carbohydrate metabolic process;catabolic process;cellular biosynthetic process;cellular carbohydrate biosynthetic process;cellular carbohydrate catabolic process;cellular carbohydrate metabolic process;cellular glucan metabolic process;cellular macromolecule bi…	binding;catalytic activity;cation binding;intramolecular transferase activity;intramolecular transferase activity, phosphotransferases;ion binding;isomerase activity;magnesium ion binding;metal ion binding;phosphoglucomutase activity	cell part;cytoplasmic part;cytosol;intracellular part	Amino sugar and nucleotide sugar metabolism;Galactose metabolism;Glycolysis / Gluconeogenesis;Pentose phosphate pathway;Purine metabolism;Starch and sucrose metabolism;Streptomycin biosynthesis	1	1.49e-26	178.84	101.2	-0.29226	1279400000
P0C0S6;Q3UA95;Q5NC91;Q8R029;G3UWL7;G3UX40;Q3THW5	5;5;6;5;5;5;5	P0C0S6;Q3THW5	Histone H2A.Z;Histone H2A;Histone H2A;Histone H2A;Histone H2A;Histone H2A.V	H2afz;H2afz;H2afv;H2afv;H2afz;H2afz;H2afv	___________MAGGKAGKDSGKAKAKAVSR;___________MAGGKAGKDSGKAKTKAVSR	NaN		#VALUE!	NaN	0.585054	-0.392476		2	___2	cellular component assembly;cellular component assembly at cellular level;cellular component organization;cellular component organization at cellular level;cellular component organization or biogenesis;cellular component organization or biogenesis at cellular level;cellular macromolecular complex assembly;cellular macromolecular complex subunit organization;cellular process;chromatin organization…	binding;DNA binding;nucleic acid binding	cell part;chromosomal part;intracellular membrane-bounded organelle;intracellular organelle;intracellular organelle part;intracellular part;macromolecular complex;membrane-bounded organelle;nucleosome;nucleus;organelle;organelle part;protein-DNA complex	Systemic lupus erythematosus	1	7.34e-06	107.17	107.17	1.6631	687960000
P0C0S6;Q3UA95;Q5NC91;Q8R029;G3UWL7;G3UX40;Q3THW5	8;8;9;8;8;8;8	P0C0S6;Q3THW5	Histone H2A.Z;Histone H2A;Histone H2A;Histone H2A;Histone H2A;Histone H2A.V	H2afz;H2afz;H2afv;H2afv;H2afz;H2afz;H2afv	________MAGGKAGKDSGKAKAKAVSRSQR;________MAGGKAGKDSGKAKTKAVSRSQR	NaN		#VALUE!	NaN	0.585054	-0.392476		2	___2	cellular component assembly;cellular component assembly at cellular level;cellular component organization;cellular component organization at cellular level;cellular component organization or biogenesis;cellular component organization or biogenesis at cellular level;cellular macromolecular complex assembly;cellular macromolecular complex subunit organization;cellular process;chromatin organization…	binding;DNA binding;nucleic acid binding	cell part;chromosomal part;intracellular membrane-bounded organelle;intracellular organelle;intracellular organelle part;intracellular part;macromolecular complex;membrane-bounded organelle;nucleosome;nucleus;organelle;organelle part;protein-DNA complex	Systemic lupus erythematosus	1	7.34e-06	107.17	107.17	1.6631	687960000
Q9DCX2;G3X9L6;B1ASE2	95;95;95	Q9DCX2	ATP synthase subunit d, mitochondrial	Atp5h;Gm10250;Atp5h	PVPEDKYTALVDQEEKEDVKSCAEFVSGSQL	NaN		#VALUE!	NaN	-0.0635515	-0.393803		2	___1	ATP biosynthetic process;ATP metabolic process;ATP synthesis coupled proton transport;biosynthetic process;cation transport;cellular biosynthetic process;cellular metabolic process;cellular nitrogen compound biosynthetic process;cellular nitrogen compound metabolic process;cellular process;energy coupled proton transport, down electrochemical gradient;establishment of localization;heterocycle bio…	cation transmembrane transporter activity;hydrogen ion transmembrane transporter activity;inorganic cation transmembrane transporter activity;ion transmembrane transporter activity;monovalent inorganic cation transmembrane transporter activity;substrate-specific transmembrane transporter activity;substrate-specific transporter activity;transmembrane transporter activity;transporter activity	cell part;cytoplasmic part;intracellular organelle part;intracellular part;macromolecular complex;membrane;membrane part;mitochondrial inner membrane;mitochondrial membrane;mitochondrial membrane part;mitochondrial part;mitochondrial proton-transporting ATP synthase complex;mitochondrial proton-transporting ATP synthase complex, coupling factor F(o);organelle inner membrane;organelle membrane;org…	Alzheimer's disease;Huntington's disease;Oxidative phosphorylation;Parkinson's disease	1	4.69e-168	230.16	100.45	0.2223	14707000000
Q9DCX2;G3X9L6;B1ASE2	117;117;117	Q9DCX2	ATP synthase subunit d, mitochondrial	Atp5h;Gm10250;Atp5h	AEFVSGSQLRIQEYEKQLEKMRNIIPFDQMT	NaN		#VALUE!	NaN	-0.0635515	-0.40319		4	___1	ATP biosynthetic process;ATP metabolic process;ATP synthesis coupled proton transport;biosynthetic process;cation transport;cellular biosynthetic process;cellular metabolic process;cellular nitrogen compound biosynthetic process;cellular nitrogen compound metabolic process;cellular process;energy coupled proton transport, down electrochemical gradient;establishment of localization;heterocycle bio…	cation transmembrane transporter activity;hydrogen ion transmembrane transporter activity;inorganic cation transmembrane transporter activity;ion transmembrane transporter activity;monovalent inorganic cation transmembrane transporter activity;substrate-specific transmembrane transporter activity;substrate-specific transporter activity;transmembrane transporter activity;transporter activity	cell part;cytoplasmic part;intracellular organelle part;intracellular part;macromolecular complex;membrane;membrane part;mitochondrial inner membrane;mitochondrial membrane;mitochondrial membrane part;mitochondrial part;mitochondrial proton-transporting ATP synthase complex;mitochondrial proton-transporting ATP synthase complex, coupling factor F(o);organelle inner membrane;organelle membrane;org…	Alzheimer's disease;Huntington's disease;Oxidative phosphorylation;Parkinson's disease	1	2.7e-56	211.68	165.9	1.058	8186700000
Q9DB20	158	Q9DB20	ATP synthase subunit O, mitochondrial	Atp5o	VTTASPLDDAVLSELKTVLKSFLSPNQILKL	NaN		#VALUE!	NaN	0.0710814	-0.429228		3	___1	ATP biosynthetic process;ATP metabolic process;ATP synthesis coupled proton transport;biosynthetic process;cation transport;cellular biosynthetic process;cellular metabolic process;cellular nitrogen compound biosynthetic process;cellular nitrogen compound metabolic process;cellular process;energy coupled proton transport, down electrochemical gradient;establishment of localization;establishment o…	binding;cation transmembrane transporter activity;drug binding;hydrogen ion transmembrane transporter activity;hydrogen ion transporting ATP synthase activity, rotational mechanism;inorganic cation transmembrane transporter activity;ion transmembrane transporter activity;lipid binding;monovalent inorganic cation transmembrane transporter activity;steroid binding;substrate-specific transmembrane t…	cell part;cytoplasmic part;intracellular organelle part;intracellular part;macromolecular complex;membrane;membrane part;mitochondrial membrane part;mitochondrial part;mitochondrial proton-transporting ATP synthase complex;mitochondrial proton-transporting ATP synthase complex, coupling factor F(o);organelle part;plasma membrane;protein complex;proton-transporting ATP synthase complex;proton-tran…	Alzheimer's disease;Huntington's disease;Oxidative phosphorylation;Parkinson's disease	1	6.17e-187	240.96	79.36	-0.15384	843990000
P61358	27	P61358	60S ribosomal protein L27	Rpl27	LVLAGRYSGRKAVIVKNIDDGTSDRPYSHAL	NaN		#VALUE!	NaN	0.212576	-0.434453		4	___1	biosynthetic process;cellular biosynthetic process;cellular macromolecule biosynthetic process;cellular macromolecule metabolic process;cellular metabolic process;cellular process;cellular protein metabolic process;macromolecule biosynthetic process;macromolecule metabolic process;metabolic process;primary metabolic process;protein metabolic process;translation	structural constituent of ribosome;structural molecule activity	cell part;cytoplasmic part;intracellular non-membrane-bounded organelle;intracellular organelle;intracellular part;macromolecular complex;non-membrane-bounded organelle;organelle;ribonucleoprotein complex;ribosome	Ribosome	1	3.5e-53	153.84	137.16	0.98966	2355000000
Q9D2J7	646	Q9D2J7	Ankyrin repeat domain-containing protein 5	Ankrd5	AKAYADYRIIDMIKEKLDNLPKQADNQKMKG	NaN		#VALUE!	NaN	NaN	-0.452142		2	___1		binding;calcium ion binding;cation binding;ion binding;metal ion binding			1	0.00322954	99.139	90.64	0.52403	331070000
Q9DCX2;G3X9L6;B1ASE2	48;48;48	Q9DCX2	ATP synthase subunit d, mitochondrial	Atp5h;Gm10250;Atp5h	SWNETFHARLASLSEKPPAIDWAYYRANVAK	NaN		#VALUE!	NaN	-0.0635515	-0.466112		2	___1	ATP biosynthetic process;ATP metabolic process;ATP synthesis coupled proton transport;biosynthetic process;cation transport;cellular biosynthetic process;cellular metabolic process;cellular nitrogen compound biosynthetic process;cellular nitrogen compound metabolic process;cellular process;energy coupled proton transport, down electrochemical gradient;establishment of localization;heterocycle bio…	cation transmembrane transporter activity;hydrogen ion transmembrane transporter activity;inorganic cation transmembrane transporter activity;ion transmembrane transporter activity;monovalent inorganic cation transmembrane transporter activity;substrate-specific transmembrane transporter activity;substrate-specific transporter activity;transmembrane transporter activity;transporter activity	cell part;cytoplasmic part;intracellular organelle part;intracellular part;macromolecular complex;membrane;membrane part;mitochondrial inner membrane;mitochondrial membrane;mitochondrial membrane part;mitochondrial part;mitochondrial proton-transporting ATP synthase complex;mitochondrial proton-transporting ATP synthase complex, coupling factor F(o);organelle inner membrane;organelle membrane;org…	Alzheimer's disease;Huntington's disease;Oxidative phosphorylation;Parkinson's disease	1	6.49e-41	161.91	88.133	1.1869	3291900000
Q9DCX2;G3X9L6;B1ASE2	85;85;85	Q9DCX2	ATP synthase subunit d, mitochondrial	Atp5h;Gm10250;Atp5h	FEKKYNALKIPVPEDKYTALVDQEEKEDVKS	NaN		#VALUE!	NaN	-0.0635515	-0.471334		3	___1	ATP biosynthetic process;ATP metabolic process;ATP synthesis coupled proton transport;biosynthetic process;cation transport;cellular biosynthetic process;cellular metabolic process;cellular nitrogen compound biosynthetic process;cellular nitrogen compound metabolic process;cellular process;energy coupled proton transport, down electrochemical gradient;establishment of localization;heterocycle bio…	cation transmembrane transporter activity;hydrogen ion transmembrane transporter activity;inorganic cation transmembrane transporter activity;ion transmembrane transporter activity;monovalent inorganic cation transmembrane transporter activity;substrate-specific transmembrane transporter activity;substrate-specific transporter activity;transmembrane transporter activity;transporter activity	cell part;cytoplasmic part;intracellular organelle part;intracellular part;macromolecular complex;membrane;membrane part;mitochondrial inner membrane;mitochondrial membrane;mitochondrial membrane part;mitochondrial part;mitochondrial proton-transporting ATP synthase complex;mitochondrial proton-transporting ATP synthase complex, coupling factor F(o);organelle inner membrane;organelle membrane;org…	Alzheimer's disease;Huntington's disease;Oxidative phosphorylation;Parkinson's disease	1	3.37e-232	319.86	127.58	-0.88896	29708000000
P62270;F5H8M6;G3UZW2;D3YWV7	8;8;8;8	P62270	40S ribosomal protein S18	Rps18;Gm10260;Rps18;Gm5321	________MSLVIPEKFQHILRVLNTNIDGR	NaN		#VALUE!	NaN	0.257724	-0.4805		2	___1	biosynthetic process;cellular biosynthetic process;cellular component biogenesis;cellular component biogenesis at cellular level;cellular component organization or biogenesis;cellular component organization or biogenesis at cellular level;cellular macromolecule biosynthetic process;cellular macromolecule metabolic process;cellular metabolic process;cellular process;cellular protein metabolic proc…	binding;nucleic acid binding;RNA binding;rRNA binding;structural constituent of ribosome;structural molecule activity	cell part;cytoplasmic part;cytosol;cytosolic small ribosomal subunit;intracellular non-membrane-bounded organelle;intracellular organelle;intracellular organelle part;intracellular part;macromolecular complex;non-membrane-bounded organelle;organelle;organelle part;ribonucleoprotein complex;ribosome;small ribosomal subunit	Ribosome	1	1.31e-05	111.39	111.39	1.2038	262890000
Q9DB20;D3Z4J0	162;162	Q9DB20	ATP synthase subunit O, mitochondrial	Atp5o;Gm5436	SPLDDAVLSELKTVLKSFLSPNQILKLEIKT	NaN		#VALUE!	NaN	0.0710814	-0.485983		2	___1	ATP biosynthetic process;ATP metabolic process;ATP synthesis coupled proton transport;biosynthetic process;cation transport;cellular biosynthetic process;cellular metabolic process;cellular nitrogen compound biosynthetic process;cellular nitrogen compound metabolic process;cellular process;energy coupled proton transport, down electrochemical gradient;establishment of localization;establishment o…	binding;cation transmembrane transporter activity;drug binding;hydrogen ion transmembrane transporter activity;hydrogen ion transporting ATP synthase activity, rotational mechanism;inorganic cation transmembrane transporter activity;ion transmembrane transporter activity;lipid binding;monovalent inorganic cation transmembrane transporter activity;steroid binding;substrate-specific transmembrane t…	cell part;cytoplasmic part;intracellular organelle part;intracellular part;macromolecular complex;membrane;membrane part;mitochondrial membrane part;mitochondrial part;mitochondrial proton-transporting ATP synthase complex;mitochondrial proton-transporting ATP synthase complex, coupling factor F(o);organelle part;plasma membrane;protein complex;proton-transporting ATP synthase complex;proton-tran…	Alzheimer's disease;Huntington's disease;Oxidative phosphorylation;Parkinson's disease	1	1.39e-10	124.16	124.16	0.33782	562390000
E0CYR7;E9PV77;P68433;P84228;P84244;F8WI35;E0CZ27;E0CYN1;E9PZA5	19;19;19;19;19;19;19;19;19	E0CYR7;E9PV77;P68433;P84228;P84244	Histone H3.1;Histone H3.2;Histone H3.3;Histone H3;Histone H3	Gm12657;Gm10257;Hist1h3a;Hist1h3b;H3f3a;Gm12657;Gm12657;Gm12657;Gm6132	TKQTARKSTGGKAPRKQLATKAARKSAPATG;TKQTARKSTGGKAPRKQLATKAARKSAPSTG;TKQTARKSTGGKAPRKQLATKAARKSVPSTG	NaN		#VALUE!	NaN	NaN	-0.49947		2	___2	biological regulation;cellular component assembly;cellular component assembly at cellular level;cellular component organization;cellular component organization at cellular level;cellular component organization or biogenesis;cellular component organization or biogenesis at cellular level;cellular macromolecular complex assembly;cellular macromolecular complex subunit organization;cellular process;…	binding;DNA binding;nucleic acid binding	cell part;chromosomal part;intracellular membrane-bounded organelle;intracellular organelle;intracellular organelle part;intracellular part;macromolecular complex;membrane-bounded organelle;nuclear part;nucleoplasm;nucleosome;nucleus;organelle;organelle part;protein-DNA complex	Systemic lupus erythematosus	1	4.75e-06	137.98	107.79	-0.81448	31473000000
E0CYR7;E9PV77;P68433;P84228;P84244;F8WI35;E0CZ27;E0CYN1;E9PZA5	24;24;24;24;24;24;24;24;24	E0CYR7;E9PV77;P68433;P84228;P84244	Histone H3.1;Histone H3.2;Histone H3.3;Histone H3;Histone H3	Gm12657;Gm10257;Hist1h3a;Hist1h3b;H3f3a;Gm12657;Gm12657;Gm12657;Gm6132	RKSTGGKAPRKQLATKAARKSAPATGGVKKP;RKSTGGKAPRKQLATKAARKSAPSTGGVKKP;RKSTGGKAPRKQLATKAARKSVPSTGGVKKP	NaN		#VALUE!	NaN	NaN	-0.49947		2	___2	biological regulation;cellular component assembly;cellular component assembly at cellular level;cellular component organization;cellular component organization at cellular level;cellular component organization or biogenesis;cellular component organization or biogenesis at cellular level;cellular macromolecular complex assembly;cellular macromolecular complex subunit organization;cellular process;…	binding;DNA binding;nucleic acid binding	cell part;chromosomal part;intracellular membrane-bounded organelle;intracellular organelle;intracellular organelle part;intracellular part;macromolecular complex;membrane-bounded organelle;nuclear part;nucleoplasm;nucleosome;nucleus;organelle;organelle part;protein-DNA complex	Systemic lupus erythematosus	1	4.75e-06	137.98	75.825	-0.81012	49773000000
P03930;Q7JCZ0	48;48	P03930	ATP synthase protein 8;ATP synthase protein 8	Mtatp8;mt-Atp8	FPLAPSPKSLTTMKVKTPWELKWTKIYLPHS	NaN		#VALUE!	NaN	0.0135541	-0.526896		2	___1	ATP biosynthetic process;ATP metabolic process;ATP synthesis coupled proton transport;biosynthetic process;cation transport;cellular biosynthetic process;cellular metabolic process;cellular nitrogen compound biosynthetic process;cellular nitrogen compound metabolic process;cellular process;energy coupled proton transport, down electrochemical gradient;establishment of localization;heterocycle bio…	ATPase activity;catalytic activity;cation transmembrane transporter activity;hydrogen ion transmembrane transporter activity;hydrolase activity;hydrolase activity, acting on acid anhydrides;hydrolase activity, acting on acid anhydrides, in phosphorus-containing anhydrides;inorganic cation transmembrane transporter activity;ion transmembrane transporter activity;monovalent inorganic cation transme…	cell part;cytoplasmic part;integral to membrane;intracellular membrane-bounded organelle;intracellular organelle;intracellular organelle part;intracellular part;intrinsic to membrane;macromolecular complex;membrane part;membrane-bounded organelle;mitochondrial membrane part;mitochondrial part;mitochondrial proton-transporting ATP synthase complex;mitochondrial proton-transporting ATP synthase com…	Alzheimer's disease;Huntington's disease;Oxidative phosphorylation;Parkinson's disease	1	0.00101172	129.85	109.66	0.2422	1485900000
Q9DB20;D3Z4J0;F7D3P8	100;100;34	Q9DB20	ATP synthase subunit O, mitochondrial	Atp5o;Gm5436;Atp5o	RTVKVKSLNDITKREKFSPLTANLMNLLAEN	NaN		#VALUE!	NaN	0.0710814	-0.531599		3	___1	ATP biosynthetic process;ATP metabolic process;ATP synthesis coupled proton transport;biosynthetic process;cation transport;cellular biosynthetic process;cellular metabolic process;cellular nitrogen compound biosynthetic process;cellular nitrogen compound metabolic process;cellular process;energy coupled proton transport, down electrochemical gradient;establishment of localization;establishment o…	binding;cation transmembrane transporter activity;drug binding;hydrogen ion transmembrane transporter activity;hydrogen ion transporting ATP synthase activity, rotational mechanism;inorganic cation transmembrane transporter activity;ion transmembrane transporter activity;lipid binding;monovalent inorganic cation transmembrane transporter activity;steroid binding;substrate-specific transmembrane t…	cell part;cytoplasmic part;intracellular membrane-bounded organelle;intracellular organelle;intracellular organelle part;intracellular part;macromolecular complex;membrane;membrane part;membrane-bounded organelle;mitochondrial membrane part;mitochondrial part;mitochondrial proton-transporting ATP synthase complex;mitochondrial proton-transporting ATP synthase complex, coupling factor F(o);mitocho…	Alzheimer's disease;Huntington's disease;Oxidative phosphorylation;Parkinson's disease	1	2.38e-67	192.18	166.61	0.2168	1427400000
E0CYR7;E9PV77;P68433;P84228;P84244;F8WI35;E0CZ27;E0CYN1;E9PZA5	24;24;24;24;24;24;24;24;24	E0CYR7;E9PV77;P68433;P84228;P84244	Histone H3.1;Histone H3.2;Histone H3.3;Histone H3;Histone H3	Gm12657;Gm10257;Hist1h3a;Hist1h3b;H3f3a;Gm12657;Gm12657;Gm12657;Gm6132	RKSTGGKAPRKQLATKAARKSAPATGGVKKP;RKSTGGKAPRKQLATKAARKSAPSTGGVKKP;RKSTGGKAPRKQLATKAARKSVPSTGGVKKP	NaN		#VALUE!	NaN	NaN	-0.533947		2	___1	biological regulation;cellular component assembly;cellular component assembly at cellular level;cellular component organization;cellular component organization at cellular level;cellular component organization or biogenesis;cellular component organization or biogenesis at cellular level;cellular macromolecular complex assembly;cellular macromolecular complex subunit organization;cellular process;…	binding;DNA binding;nucleic acid binding	cell part;chromosomal part;intracellular membrane-bounded organelle;intracellular organelle;intracellular organelle part;intracellular part;macromolecular complex;membrane-bounded organelle;nuclear part;nucleoplasm;nucleosome;nucleus;organelle;organelle part;protein-DNA complex	Systemic lupus erythematosus	1	4.75e-06	137.98	75.825	-0.81012	49773000000
A6ZI44;P05064;Q9CPQ9	284;230;230	A6ZI44;Q9CPQ9	Fructose-bisphosphate aldolase;Fructose-bisphosphate aldolase A;Fructose-bisphosphate aldolase	Aldoa;Aldoa;Aldoart1	KALSDHHVYLEGTLLKPNMVTPGHACTQKFS	NaN		#VALUE!	NaN	0.56153	-0.53458		5	___1	alcohol catabolic process;alcohol metabolic process;carbohydrate catabolic process;carbohydrate metabolic process;catabolic process;cellular carbohydrate catabolic process;cellular carbohydrate metabolic process;cellular component assembly;cellular component organization;cellular component organization or biogenesis;cellular metabolic process;cellular process;generation of precursor metabolites a…	aldehyde-lyase activity;carbon-carbon lyase activity;catalytic activity;fructose-bisphosphate aldolase activity;lyase activity	cell part;contractile fiber part;cytoplasmic part;intracellular part;macromolecular complex;membrane;organelle part;protein complex;Z disc	Carbon fixation in photosynthetic organisms;Fructose and mannose metabolism;Glycolysis / Gluconeogenesis;Pentose phosphate pathway	1	3.05e-23	113.13	78.128	-0.50951	245310000
D3Z5X1;P24456;D3Z5T9;Q8CIM7;Q6P8N9	414;414;412;414;252	D3Z5X1;P24456;Q8CIM7	Cytochrome P450 2D10;Cytochrome P450 2D26	Cyp2d34;Cyp2d10;Cyp2d10;Cyp2d26;Cyp2d40	IPNLSSVLKDETVWEKPLRFYPEHFLDAQGH;IPNMSSMLKDETVWEKPLRFYPEHFLDAQGH;IPNMSSVLKDETVWEKPLRFHPEHFLDAQGH	NaN		#VALUE!	NaN	NaN	-0.550394		2	___1	anatomical structure development;developmental process;female pregnancy;liver development;multi-organism process;organ development;reproductive process;response to chemical stimulus;response to drug;response to stimulus	aromatase activity;binding;catalytic activity;cation binding;electron carrier activity;heme binding;ion binding;iron ion binding;metal ion binding;monooxygenase activity;oxidoreductase activity;oxidoreductase activity, acting on paired donors, with incorporation or reduction of molecular oxygen;oxidoreductase activity, acting on paired donors, with incorporation or reduction of molecular oxygen, …	cell part;cytoplasmic part;endoplasmic reticulum membrane;endoplasmic reticulum part;intracellular organelle part;intracellular part;membrane;membrane part;organelle membrane;organelle part	Drug metabolism - cytochrome P450	1	0.000214841	109.42	109.42	0.10255	141500000
A2A974;Q91WL5	66;66	A2A974;Q91WL5	Cytochrome P450 4A12A	Cyp4a12b;Cyp4a12a	FPSPPSHWLFGHKILKDQDLQDILTRIKNFP	NaN		#VALUE!	NaN	-3.95129	-0.558249		2	___1	carboxylic acid metabolic process;cellular ketone metabolic process;cellular lipid metabolic process;cellular metabolic process;cellular process;fatty acid metabolic process;lipid metabolic process;metabolic process;monocarboxylic acid metabolic process;organic acid metabolic process;oxoacid metabolic process;primary metabolic process;small molecule metabolic process	alkane 1-monooxygenase activity;aromatase activity;binding;catalytic activity;cation binding;electron carrier activity;heme binding;ion binding;iron ion binding;metal ion binding;monooxygenase activity;oxidoreductase activity;oxidoreductase activity, acting on paired donors, with incorporation or reduction of molecular oxygen;oxidoreductase activity, acting on paired donors, with incorporation or…	cell part;cytoplasmic part;endoplasmic reticulum membrane;endoplasmic reticulum part;intracellular organelle part;intracellular part;membrane;membrane part;organelle membrane;organelle part	Arachidonic acid metabolism;Fatty acid metabolism;PPAR signaling pathway;Retinol metabolism;Vascular smooth muscle contraction	1	4.63e-47	194.55	105.14	1.1126	93009000
A2AE89;P10649;E9QA33	50;50;16	A2AE89;P10649	Glutathione S-transferase Mu 1	Gstm1;Gstm1;Gstm2-ps1	MGDAPDFDRSQWLNEKFKLGLDFPNLPYLID	NaN		#VALUE!	NaN	NaN	-0.55913		2	___1	cellular process;cellular response to chemical stimulus;cellular response to drug;cellular response to stimulus;response to chemical stimulus;response to drug;response to stimulus	binding;catalytic activity;glutathione transferase activity;identical protein binding;protein binding;protein dimerization activity;protein heterodimerization activity;protein homodimerization activity;transferase activity;transferase activity, transferring alkyl or aryl (other than methyl) groups	cell part;cytoplasm;intracellular part	Drug metabolism - cytochrome P450;Glutathione metabolism;Metabolism of xenobiotics by cytochrome P450	1	0.00171718	90.142	90.142	1.3311	40694000
Q8BFR5;D3YVN7;Q8BFR5-2	256;256;256	Q8BFR5	Elongation factor Tu, mitochondrial;Elongation factor Tu	Tufm;Gm9755	DAVDTYIPVPTRDLDKPFLLPVESVYSIPGR	NaN		#VALUE!	NaN	0.151194	-0.567362		2	___1	catabolic process;cellular catabolic process;cellular metabolic process;cellular nitrogen compound catabolic process;cellular nitrogen compound metabolic process;cellular process;GTP catabolic process;GTP metabolic process;heterocycle catabolic process;heterocycle metabolic process;metabolic process;nitrogen compound metabolic process;nucleobase-containing compound catabolic process;nucleobase-co…	binding;catalytic activity;GTP binding;GTPase activity;guanyl nucleotide binding;guanyl ribonucleotide binding;hydrolase activity;hydrolase activity, acting on acid anhydrides;hydrolase activity, acting on acid anhydrides, in phosphorus-containing anhydrides;nucleic acid binding;nucleoside-triphosphatase activity;nucleotide binding;purine nucleotide binding;purine ribonucleoside triphosphate bind…	cell part;cytoplasmic part;intracellular;intracellular organelle part;intracellular part;membrane;mitochondrial inner membrane;mitochondrial membrane;mitochondrial part;organelle inner membrane;organelle membrane;organelle part	Plant-pathogen interaction	1	2.05e-19	115.63	80.156	0.62364	911130000
Q9DCX2;G3X9L6;B1ASE2	63;63;63	Q9DCX2	ATP synthase subunit d, mitochondrial	Atp5h;Gm10250;Atp5h	KPPAIDWAYYRANVAKPGLVDDFEKKYNALK	NaN		#VALUE!	NaN	-0.0635515	-0.587884		3	___2	ATP biosynthetic process;ATP metabolic process;ATP synthesis coupled proton transport;biosynthetic process;cation transport;cellular biosynthetic process;cellular metabolic process;cellular nitrogen compound biosynthetic process;cellular nitrogen compound metabolic process;cellular process;energy coupled proton transport, down electrochemical gradient;establishment of localization;heterocycle bio…	cation transmembrane transporter activity;hydrogen ion transmembrane transporter activity;inorganic cation transmembrane transporter activity;ion transmembrane transporter activity;monovalent inorganic cation transmembrane transporter activity;substrate-specific transmembrane transporter activity;substrate-specific transporter activity;transmembrane transporter activity;transporter activity	cell part;cytoplasmic part;intracellular organelle part;intracellular part;macromolecular complex;membrane;membrane part;mitochondrial inner membrane;mitochondrial membrane;mitochondrial membrane part;mitochondrial part;mitochondrial proton-transporting ATP synthase complex;mitochondrial proton-transporting ATP synthase complex, coupling factor F(o);organelle inner membrane;organelle membrane;org…	Alzheimer's disease;Huntington's disease;Oxidative phosphorylation;Parkinson's disease	1	1.5e-15	122.93	122.93	-0.55503	329020000
Q9DCX2;G3X9L6;B1ASE2	72;72;72	Q9DCX2	ATP synthase subunit d, mitochondrial	Atp5h;Gm10250;Atp5h	YRANVAKPGLVDDFEKKYNALKIPVPEDKYT	NaN		#VALUE!	NaN	-0.0635515	-0.587884		2	___2	ATP biosynthetic process;ATP metabolic process;ATP synthesis coupled proton transport;biosynthetic process;cation transport;cellular biosynthetic process;cellular metabolic process;cellular nitrogen compound biosynthetic process;cellular nitrogen compound metabolic process;cellular process;energy coupled proton transport, down electrochemical gradient;establishment of localization;heterocycle bio…	cation transmembrane transporter activity;hydrogen ion transmembrane transporter activity;inorganic cation transmembrane transporter activity;ion transmembrane transporter activity;monovalent inorganic cation transmembrane transporter activity;substrate-specific transmembrane transporter activity;substrate-specific transporter activity;transmembrane transporter activity;transporter activity	cell part;cytoplasmic part;intracellular organelle part;intracellular part;macromolecular complex;membrane;membrane part;mitochondrial inner membrane;mitochondrial membrane;mitochondrial membrane part;mitochondrial part;mitochondrial proton-transporting ATP synthase complex;mitochondrial proton-transporting ATP synthase complex, coupling factor F(o);organelle inner membrane;organelle membrane;org…	Alzheimer's disease;Huntington's disease;Oxidative phosphorylation;Parkinson's disease	1	8.89e-59	238.01	221.5	-0.68856	29633000000
Q9DB20;D3Z4J0	70;70	Q9DB20	ATP synthase subunit O, mitochondrial	Atp5o;Gm5436	LDQVEKELLRVGQLLKDPKVSLAVLNPYIKR	NaN		#VALUE!	NaN	0.0710814	-0.602606		3	___1	ATP biosynthetic process;ATP metabolic process;ATP synthesis coupled proton transport;biosynthetic process;cation transport;cellular biosynthetic process;cellular metabolic process;cellular nitrogen compound biosynthetic process;cellular nitrogen compound metabolic process;cellular process;energy coupled proton transport, down electrochemical gradient;establishment of localization;establishment o…	binding;cation transmembrane transporter activity;drug binding;hydrogen ion transmembrane transporter activity;hydrogen ion transporting ATP synthase activity, rotational mechanism;inorganic cation transmembrane transporter activity;ion transmembrane transporter activity;lipid binding;monovalent inorganic cation transmembrane transporter activity;steroid binding;substrate-specific transmembrane t…	cell part;cytoplasmic part;intracellular organelle part;intracellular part;macromolecular complex;membrane;membrane part;mitochondrial membrane part;mitochondrial part;mitochondrial proton-transporting ATP synthase complex;mitochondrial proton-transporting ATP synthase complex, coupling factor F(o);organelle part;plasma membrane;protein complex;proton-transporting ATP synthase complex;proton-tran…	Alzheimer's disease;Huntington's disease;Oxidative phosphorylation;Parkinson's disease	1	5.88e-06	93.494	93.494	0.41418	113330000
P62270;F5H8M6	94;94	P62270	40S ribosomal protein S18	Rps18;Gm10260	IPDWFLNRQKDVKDGKYSQVLANGLDNKLRE	NaN		#VALUE!	NaN	0.257724	-0.64438		2	___1	biosynthetic process;cellular biosynthetic process;cellular component biogenesis;cellular component biogenesis at cellular level;cellular component organization or biogenesis;cellular component organization or biogenesis at cellular level;cellular macromolecule biosynthetic process;cellular macromolecule metabolic process;cellular metabolic process;cellular process;cellular protein metabolic proc…	binding;nucleic acid binding;RNA binding;rRNA binding;structural constituent of ribosome;structural molecule activity	cell part;cytoplasmic part;cytosol;cytosolic small ribosomal subunit;intracellular non-membrane-bounded organelle;intracellular organelle;intracellular organelle part;intracellular part;macromolecular complex;non-membrane-bounded organelle;organelle;organelle part;ribonucleoprotein complex;ribosome;small ribosomal subunit	Ribosome	1	2.09e-49	177.58	93.51	-0.44313	84607000
D3Z7W7;P97351;D3Z6C3	182;182;182	D3Z7W7;P97351	40S ribosomal protein S3a	Gm9000;Rps3a;Gm10119	KMMEIMTREVQTNDLKEVVNKLIPDSIGKDI	NaN		#VALUE!	0.508062	NaN	-0.653653		2	___1	biological regulation;biosynthetic process;cell differentiation;cellular biosynthetic process;cellular developmental process;cellular macromolecule biosynthetic process;cellular macromolecule metabolic process;cellular metabolic process;cellular process;cellular protein metabolic process;developmental process;induction of apoptosis;induction of programmed cell death;macromolecule biosynthetic pro…	structural constituent of ribosome;structural molecule activity	cell part;cytoplasmic part;cytosol;intracellular membrane-bounded organelle;intracellular non-membrane-bounded organelle;intracellular organelle;intracellular part;macromolecular complex;membrane-bounded organelle;non-membrane-bounded organelle;nucleus;organelle;ribonucleoprotein complex;ribosome	Ribosome	1	1.27e-53	211.77	175.21	0.93346	354980000
P10853;Q8CGP2-2;Q64475;Q8CGP2;P70696;Q6ZWY9;Q64478;P10854;Q64525;Q8CGP0;Q9D2U9	121;121;121;121;122;121;121;121;121;121;121	P10853;Q6ZWY9;Q8CGP0;Q9D2U9	Histone H2B type 1-F/J/L;Histone H2B type 1-B;Histone H2B type 1-P;Histone H2B type 1-A;Histone H2B type 1-C/E/G;Histone H2B type 1-H;Histone H2B type 1-M;Histone H2B type 2-B;Histone H2B type 3-B;Histone H2B type 3-A	Hist1h2bf;Hist1h2bb;Hist1h2bp;Hist1h2ba;Hist1h2bc;Hist1h2bh;Hist1h2bm;Hist2h2bb;Hist3h2bb;Hist3h2ba	ELAKHAVSEGTKAVTKYTSSK__________	NaN		#VALUE!	NaN	1.37417	-0.65815		2	___1	biological regulation;cell migration;cell motility;cellular component assembly;cellular component assembly at cellular level;cellular component movement;cellular component organization;cellular component organization at cellular level;cellular component organization or biogenesis;cellular component organization or biogenesis at cellular level;cellular macromolecular complex assembly;cellular macr…	binding;DNA binding;nucleic acid binding	cell part;chromosomal part;extrinsic to membrane;extrinsic to plasma membrane;intracellular membrane-bounded organelle;intracellular organelle;intracellular organelle part;intracellular part;macromolecular complex;membrane part;membrane-bounded organelle;nucleosome;nucleus;organelle;organelle part;plasma membrane part;protein-DNA complex	Systemic lupus erythematosus	1	0.0012019	111.61	91.584	-0.10856	121620000
Q9DB20;D3Z4J0	172;172	Q9DB20	ATP synthase subunit O, mitochondrial	Atp5o;Gm5436	LKTVLKSFLSPNQILKLEIKTDPSIMGGMIV	NaN		#VALUE!	NaN	0.0710814	-0.684817		2	___1	ATP biosynthetic process;ATP metabolic process;ATP synthesis coupled proton transport;biosynthetic process;cation transport;cellular biosynthetic process;cellular metabolic process;cellular nitrogen compound biosynthetic process;cellular nitrogen compound metabolic process;cellular process;energy coupled proton transport, down electrochemical gradient;establishment of localization;establishment o…	binding;cation transmembrane transporter activity;drug binding;hydrogen ion transmembrane transporter activity;hydrogen ion transporting ATP synthase activity, rotational mechanism;inorganic cation transmembrane transporter activity;ion transmembrane transporter activity;lipid binding;monovalent inorganic cation transmembrane transporter activity;steroid binding;substrate-specific transmembrane t…	cell part;cytoplasmic part;intracellular organelle part;intracellular part;macromolecular complex;membrane;membrane part;mitochondrial membrane part;mitochondrial part;mitochondrial proton-transporting ATP synthase complex;mitochondrial proton-transporting ATP synthase complex, coupling factor F(o);organelle part;plasma membrane;protein complex;proton-transporting ATP synthase complex;proton-tran…	Alzheimer's disease;Huntington's disease;Oxidative phosphorylation;Parkinson's disease	1	2.51e-22	159.22	127.32	-0.3062	1180500000
E0CYR7;E9PV77;P68433;P84228;P84244;F8WI35;E0CZ27;E0CYN1	10;10;10;10;10;10;10;10	E0CYR7;E9PV77;P68433;P84228;P84244	Histone H3.1;Histone H3.2;Histone H3.3;Histone H3;Histone H3	Gm12657;Gm10257;Hist1h3a;Hist1h3b;H3f3a;Gm12657;Gm12657;Gm12657	______MARTKQTARKSTGGKAPRKQLATKA	NaN		#VALUE!	NaN	NaN	-0.686436		2	___2	biological regulation;cellular component assembly;cellular component assembly at cellular level;cellular component organization;cellular component organization at cellular level;cellular component organization or biogenesis;cellular component organization or biogenesis at cellular level;cellular macromolecular complex assembly;cellular macromolecular complex subunit organization;cellular process;…	binding;DNA binding;nucleic acid binding	cell part;chromosomal part;intracellular membrane-bounded organelle;intracellular organelle;intracellular organelle part;intracellular part;macromolecular complex;membrane-bounded organelle;nuclear part;nucleoplasm;nucleosome;nucleus;organelle;organelle part;protein-DNA complex	Systemic lupus erythematosus	1	0.00054	116.52	89.46	1.5349	4259200000
E0CYR7;E9PV77;P68433;P84228;P84244;F8WI35;E0CZ27;E0CYN1	15;15;15;15;15;15;15;15	E0CYR7;E9PV77;P68433;P84228;P84244	Histone H3.1;Histone H3.2;Histone H3.3;Histone H3;Histone H3	Gm12657;Gm10257;Hist1h3a;Hist1h3b;H3f3a;Gm12657;Gm12657;Gm12657	_MARTKQTARKSTGGKAPRKQLATKAARKSA;_MARTKQTARKSTGGKAPRKQLATKAARKSV	NaN		#VALUE!	NaN	NaN	-0.686436		2	___2	biological regulation;cellular component assembly;cellular component assembly at cellular level;cellular component organization;cellular component organization at cellular level;cellular component organization or biogenesis;cellular component organization or biogenesis at cellular level;cellular macromolecular complex assembly;cellular macromolecular complex subunit organization;cellular process;…	binding;DNA binding;nucleic acid binding	cell part;chromosomal part;intracellular membrane-bounded organelle;intracellular organelle;intracellular organelle part;intracellular part;macromolecular complex;membrane-bounded organelle;nuclear part;nucleoplasm;nucleosome;nucleus;organelle;organelle part;protein-DNA complex	Systemic lupus erythematosus	1	0.00054	116.52	101.35	0.35171	9742500000
F6Q5Z8;Q9CZX8;F8VQH5;D3Z722;D3Z5R8;D3YUG3	117;111;115;111;147;122	F6Q5Z8;Q9CZX8	40S ribosomal protein S19	Rps19-ps1;Rps19;Rps19-ps4;Rps19;Rps19;Rps19	SKSVARRVLQALEGLKMVEKDQDGGRKLTPQ	NaN		#VALUE!	NaN	NaN	-0.746052	+	2	___1	biosynthetic process;cell differentiation;cellular biosynthetic process;cellular component biogenesis;cellular component biogenesis at cellular level;cellular component organization or biogenesis;cellular component organization or biogenesis at cellular level;cellular developmental process;cellular macromolecule biosynthetic process;cellular macromolecule metabolic process;cellular metabolic proc…	structural constituent of ribosome;structural molecule activity	cell part;cytoplasmic part;cytosolic small ribosomal subunit;intracellular non-membrane-bounded organelle;intracellular organelle;intracellular organelle part;intracellular part;macromolecular complex;non-membrane-bounded organelle;nuclear part;nucleolus;organelle;organelle part;ribonucleoprotein complex;ribosome;small ribosomal subunit	Ribosome	1	5.51e-77	220.59	79.771	1.1437	931870000
E0CYR7;E9PV77;P68433;P84228;P84244;F8WI35;E0CZ27;E0CYN1	15;15;15;15;15;15;15;15	E0CYR7;E9PV77;P68433;P84228;P84244	Histone H3.1;Histone H3.2;Histone H3.3;Histone H3;Histone H3	Gm12657;Gm10257;Hist1h3a;Hist1h3b;H3f3a;Gm12657;Gm12657;Gm12657	_MARTKQTARKSTGGKAPRKQLATKAARKSA;_MARTKQTARKSTGGKAPRKQLATKAARKSV	NaN		#VALUE!	NaN	NaN	-0.7562		2	___1	biological regulation;cellular component assembly;cellular component assembly at cellular level;cellular component organization;cellular component organization at cellular level;cellular component organization or biogenesis;cellular component organization or biogenesis at cellular level;cellular macromolecular complex assembly;cellular macromolecular complex subunit organization;cellular process;…	binding;DNA binding;nucleic acid binding	cell part;chromosomal part;intracellular membrane-bounded organelle;intracellular organelle;intracellular organelle part;intracellular part;macromolecular complex;membrane-bounded organelle;nuclear part;nucleoplasm;nucleosome;nucleus;organelle;organelle part;protein-DNA complex	Systemic lupus erythematosus	1	0.00054	116.52	101.35	0.35171	9742500000
Q9DCX2;G3X9L6	144;144	Q9DCX2	ATP synthase subunit d, mitochondrial	Atp5h;Gm10250	DQMTIDDLNEIFPETKLDKKKYPYWPHQPIE	NaN		#VALUE!	NaN	-0.0635515	-0.789995		3	___1	ATP biosynthetic process;ATP metabolic process;ATP synthesis coupled proton transport;biosynthetic process;cation transport;cellular biosynthetic process;cellular metabolic process;cellular nitrogen compound biosynthetic process;cellular nitrogen compound metabolic process;cellular process;energy coupled proton transport, down electrochemical gradient;establishment of localization;heterocycle bio…	cation transmembrane transporter activity;hydrogen ion transmembrane transporter activity;inorganic cation transmembrane transporter activity;ion transmembrane transporter activity;monovalent inorganic cation transmembrane transporter activity;substrate-specific transmembrane transporter activity;substrate-specific transporter activity;transmembrane transporter activity;transporter activity	cell part;cytoplasmic part;intracellular organelle part;intracellular part;macromolecular complex;membrane part;mitochondrial membrane part;mitochondrial part;mitochondrial proton-transporting ATP synthase complex;mitochondrial proton-transporting ATP synthase complex, coupling factor F(o);organelle part;protein complex;proton-transporting ATP synthase complex;proton-transporting ATP synthase com…	Alzheimer's disease;Huntington's disease;Oxidative phosphorylation;Parkinson's disease	1	3.65e-40	135.69	112.26	0.67089	1878000000
P03930;Q7JCZ0	54;54	P03930	ATP synthase protein 8;ATP synthase protein 8	Mtatp8;mt-Atp8	PKSLTTMKVKTPWELKWTKIYLPHSLPQQ__	NaN		#VALUE!	NaN	0.0135541	-0.790045		2	___1	ATP biosynthetic process;ATP metabolic process;ATP synthesis coupled proton transport;biosynthetic process;cation transport;cellular biosynthetic process;cellular metabolic process;cellular nitrogen compound biosynthetic process;cellular nitrogen compound metabolic process;cellular process;energy coupled proton transport, down electrochemical gradient;establishment of localization;heterocycle bio…	ATPase activity;catalytic activity;cation transmembrane transporter activity;hydrogen ion transmembrane transporter activity;hydrolase activity;hydrolase activity, acting on acid anhydrides;hydrolase activity, acting on acid anhydrides, in phosphorus-containing anhydrides;inorganic cation transmembrane transporter activity;ion transmembrane transporter activity;monovalent inorganic cation transme…	cell part;cytoplasmic part;integral to membrane;intracellular membrane-bounded organelle;intracellular organelle;intracellular organelle part;intracellular part;intrinsic to membrane;macromolecular complex;membrane part;membrane-bounded organelle;mitochondrial membrane part;mitochondrial part;mitochondrial proton-transporting ATP synthase complex;mitochondrial proton-transporting ATP synthase com…	Alzheimer's disease;Huntington's disease;Oxidative phosphorylation;Parkinson's disease	1	1.7e-05	136.02	129.89	-0.14604	427760000
Q8BLD7;Q8VCH0;Q921H8	129;259;259	Q8BLD7;Q8VCH0;Q921H8	3-ketoacyl-CoA thiolase B, peroxisomal;3-ketoacyl-CoA thiolase A, peroxisomal	Acaa1a;Acaa1b;Acaa1a	QDEGVRPSTTMQGLAKLKPAFKDGGSTTAGN	NaN		#VALUE!	NaN	-1.93266	-0.821757		3	___1	carboxylic acid metabolic process;cellular ketone metabolic process;cellular lipid metabolic process;cellular metabolic process;cellular process;fatty acid metabolic process;lipid metabolic process;metabolic process;monocarboxylic acid metabolic process;organic acid metabolic process;oxoacid metabolic process;primary metabolic process;small molecule metabolic process	acetyl-CoA C-acetyltransferase activity;acetyl-CoA C-acyltransferase activity;acetyltransferase activity;C-acetyltransferase activity;C-acyltransferase activity;catalytic activity;transferase activity;transferase activity, transferring acyl groups;transferase activity, transferring acyl groups other than amino-acyl groups	cell part;cytoplasmic part;intracellular membrane-bounded organelle;intracellular organelle;intracellular part;membrane-bounded organelle;microbody;mitochondrion;organelle;peroxisome	Benzoate degradation;Biosynthesis of unsaturated fatty acids;Fatty acid metabolism;Peroxisome;PPAR signaling pathway;Valine, leucine and isoleucine degradation	1	1.2e-53	162.85	140.64	-0.044889	980350000
P62852;D3YXG3	52;52	P62852	40S ribosomal protein S25	Rps25;Gm4963	KGKVRDKLNNLVLFDKATYDKLCKEVPNYKL	NaN		#VALUE!	NaN	0.313541	-0.870703		2	___1			cell part;cytosolic small ribosomal subunit;intracellular non-membrane-bounded organelle;intracellular organelle;intracellular organelle part;intracellular part;macromolecular complex;non-membrane-bounded organelle;nuclear part;nucleolus;organelle;organelle part;ribonucleoprotein complex;small ribosomal subunit	Ribosome	1	7.16e-17	151.07	80.102	2.1031	273450000
Q9DCX2;G3X9L6;B1ASE2	78;78;78	Q9DCX2	ATP synthase subunit d, mitochondrial	Atp5h;Gm10250;Atp5h	KPGLVDDFEKKYNALKIPVPEDKYTALVDQE	NaN		#VALUE!	NaN	-0.0635515	-0.973041		2	___1	ATP biosynthetic process;ATP metabolic process;ATP synthesis coupled proton transport;biosynthetic process;cation transport;cellular biosynthetic process;cellular metabolic process;cellular nitrogen compound biosynthetic process;cellular nitrogen compound metabolic process;cellular process;energy coupled proton transport, down electrochemical gradient;establishment of localization;heterocycle bio…	cation transmembrane transporter activity;hydrogen ion transmembrane transporter activity;inorganic cation transmembrane transporter activity;ion transmembrane transporter activity;monovalent inorganic cation transmembrane transporter activity;substrate-specific transmembrane transporter activity;substrate-specific transporter activity;transmembrane transporter activity;transporter activity	cell part;cytoplasmic part;intracellular organelle part;intracellular part;macromolecular complex;membrane;membrane part;mitochondrial inner membrane;mitochondrial membrane;mitochondrial membrane part;mitochondrial part;mitochondrial proton-transporting ATP synthase complex;mitochondrial proton-transporting ATP synthase complex, coupling factor F(o);organelle inner membrane;organelle membrane;org…	Alzheimer's disease;Huntington's disease;Oxidative phosphorylation;Parkinson's disease	0.999998	1.99e-08	125.36	104.09	-0.43589	107620000
A8DUK4;P02088	133;133	A8DUK4	Hemoglobin subunit beta-1	Hbb-b1;Hbb-b1	HLGKDFTPAAQAAFQKVVAGVAAALAHKYH_	NaN		#VALUE!	NaN	1.68621	-1.26056		3	___1		binding;cation binding;heme binding;ion binding;iron ion binding;metal ion binding;oxygen binding;oxygen transporter activity;substrate-specific transporter activity;tetrapyrrole binding;transition metal ion binding;transporter activity	cell part;cytoplasmic part;cytosolic part;hemoglobin complex;intracellular part;macromolecular complex;protein complex	African trypanosomiasis;Malaria	1	9.24e-10	96.016	95.48	-0.29227	336900000
Q9DCX2;G3X9L6	148;147	Q9DCX2	ATP synthase subunit d, mitochondrial	Atp5h;Gm10250	IDDLNEIFPETKLDKKKYPYWPHQPIENL__	NaN		#VALUE!	NaN	-0.0635515	-1.34249		2	___1	ATP biosynthetic process;ATP metabolic process;ATP synthesis coupled proton transport;biosynthetic process;cation transport;cellular biosynthetic process;cellular metabolic process;cellular nitrogen compound biosynthetic process;cellular nitrogen compound metabolic process;cellular process;energy coupled proton transport, down electrochemical gradient;establishment of localization;heterocycle bio…	cation transmembrane transporter activity;hydrogen ion transmembrane transporter activity;inorganic cation transmembrane transporter activity;ion transmembrane transporter activity;monovalent inorganic cation transmembrane transporter activity;substrate-specific transmembrane transporter activity;substrate-specific transporter activity;transmembrane transporter activity;transporter activity	cell part;cytoplasmic part;intracellular organelle part;intracellular part;macromolecular complex;membrane part;mitochondrial membrane part;mitochondrial part;mitochondrial proton-transporting ATP synthase complex;mitochondrial proton-transporting ATP synthase complex, coupling factor F(o);organelle part;protein complex;proton-transporting ATP synthase complex;proton-transporting ATP synthase com…	Alzheimer's disease;Huntington's disease;Oxidative phosphorylation;Parkinson's disease	0.5	7e-17	150.26	150.26	-0.06234	787420000
A8DUK4;P02088	121;121	A8DUK4	Hemoglobin subunit beta-1	Hbb-b1;Hbb-b1	LLGNMIVIVLGHHLGKDFTPAAQAAFQKVVA	NaN		#VALUE!	NaN	1.68621	-1.74202		4	___1		binding;cation binding;heme binding;ion binding;iron ion binding;metal ion binding;oxygen binding;oxygen transporter activity;substrate-specific transporter activity;tetrapyrrole binding;transition metal ion binding;transporter activity	cell part;cytoplasmic part;cytosolic part;hemoglobin complex;intracellular part;macromolecular complex;protein complex	African trypanosomiasis;Malaria	1	3.78e-83	177.12	177.12	0.30937	2647800000
F6VSJ4;P17563;Q63836;G3UYY2	446;448;448;386	F6VSJ4;P17563;Q63836	Selenium-binding protein 1;Selenium-binding protein 2	Selenbp2;Selenbp1;Selenbp2;Selenbp2	NGGLKLNPNFLVDFGKEPLGPALAHELRYPG	NaN		#VALUE!	NaN	NaN	-1.74683		3	___1	brown fat cell differentiation;cell differentiation;cellular developmental process;cellular process;developmental process;establishment of localization;establishment of protein localization;fat cell differentiation;protein transport;transport	binding;selenium binding	cell part;cytoplasmic part;cytosol;intracellular membrane-bounded organelle;intracellular organelle;intracellular part;membrane;membrane-bounded organelle;nucleus;organelle		1	1.49e-88	193.71	86.08	0.46713	2169800000
A8DUK4	145	A8DUK4		Hbb-b1	AFQKVVAGVAAALAHKYH_____________	NaN		#VALUE!	NaN	1.68621	-1.91022		3	___1		binding;cation binding;heme binding;ion binding;iron ion binding;metal ion binding;oxygen binding;oxygen transporter activity;substrate-specific transporter activity;tetrapyrrole binding;transition metal ion binding;transporter activity	cell part;cytoplasmic part;cytosolic part;hemoglobin complex;intracellular part;macromolecular complex;protein complex	African trypanosomiasis;Malaria	1	4.86e-30	176.18	95.401	-0.76796	3243300000
Q91VB8;P01942;F7CAE1	140;140;138	Q91VB8	Hemoglobin subunit alpha	Hba-a1;Hba;Hba-a2	SLDKFLASVSTVLTSKYR_____________	NaN		#VALUE!	NaN	1.611	-2.13028		2	___1	response to chemical stimulus;response to organic substance;response to stilbenoid;response to stimulus	binding;cation binding;heme binding;ion binding;iron ion binding;metal ion binding;oxygen binding;oxygen transporter activity;substrate-specific transporter activity;tetrapyrrole binding;transition metal ion binding;transporter activity	cell part;cytoplasmic part;cytosolic part;hemoglobin complex;intracellular part;macromolecular complex;protein complex	African trypanosomiasis;Malaria	1	2.44e-22	159.52	103.21	-0.95468	247040000
Q91VB8;F7CAE1	91;89	Q91VB8		Hba-a1;Hba-a2	DLPGALSALSDLHAHKLRVDPVNFKLLSHCL	NaN		#VALUE!	NaN	1.611	-2.73781		5	___1		binding;cation binding;heme binding;ion binding;iron ion binding;metal ion binding;oxygen binding;oxygen transporter activity;substrate-specific transporter activity;tetrapyrrole binding;transition metal ion binding;transporter activity	cell part;cytoplasmic part;cytosolic part;hemoglobin complex;intracellular part;macromolecular complex;protein complex	African trypanosomiasis;Malaria	1	8.5e-74	165.52	158.2	-0.086947	2297500000
A8DUK4;P02088;E9Q223	96;96;96	A8DUK4	Hemoglobin subunit beta-1	Hbb-b1;Hbb-b1;Beta-s	SLKGTFASLSELHCDKLHVDPENFRLLGNMI	NaN		#VALUE!	NaN	1.68621	-3.68267		4	___1		binding;cation binding;heme binding;ion binding;iron ion binding;metal ion binding;oxygen binding;oxygen transporter activity;substrate-specific transporter activity;tetrapyrrole binding;transition metal ion binding;transporter activity	cell part;cytoplasmic part;cytosolic part;hemoglobin complex;intracellular part;macromolecular complex;protein complex	African trypanosomiasis;Malaria	1	2.17e-100	199.89	76.186	-0.39539	928730000
P02089	96	P02089	Hemoglobin subunit beta-2	Hbb-b2	NLKGTFASLSELHCDKLHVDPENFRLLGNAI	NaN		#VALUE!	NaN	NaN	-3.68267		4	___1		binding;cation binding;heme binding;ion binding;iron ion binding;metal ion binding;oxygen binding;oxygen transporter activity;substrate-specific transporter activity;tetrapyrrole binding;transition metal ion binding;transporter activity	cell part;cytoplasmic part;cytosolic part;hemoglobin complex;intracellular part;macromolecular complex;protein complex	African trypanosomiasis;Malaria	1	2.17e-100	199.89	76.186	-0.39539	928730000
P07758;Q00896;Q00898	292;292;292	P07758;Q00896;Q00898	Alpha-1-antitrypsin 1-1;Alpha-1-antitrypsin 1-3;Alpha-1-antitrypsin 1-5	Serpina1a;Serpina1c;Serpina1e	KMQHLEQTLNKELISKFLLNRRRRLAQIHIP;KMQHLEQTLSKELISKFLLNRRRRLAQIHFP	-0.0834353		-1.0271	-0.919474	0.107624	-1.11053		3	___1	acute inflammatory response;acute-phase response;biological regulation;defense response;inflammatory response;regulation of biological process;regulation of macromolecule metabolic process;regulation of metabolic process;regulation of primary metabolic process;regulation of protein metabolic process;regulation of proteolysis;response to chemical stimulus;response to cytokine stimulus;response to …	endopeptidase inhibitor activity;endopeptidase regulator activity;enzyme inhibitor activity;enzyme regulator activity;peptidase inhibitor activity;peptidase regulator activity;serine-type endopeptidase inhibitor activity	extracellular region	Complement and coagulation cascades	1	4.09e-24	196.07	153.12	0.60824	2152100000
P26443	503	P26443	Glutamate dehydrogenase 1, mitochondrial	Glud1	VPTAEFQDRISGASEKDIVHSGLAYTMERSA	-0.17654		0.259204	0.0776246	-0.181579	0.0826639		3	___1	amine metabolic process;behavior;biological regulation;carboxylic acid metabolic process;cellular amine metabolic process;cellular amino acid metabolic process;cellular ketone metabolic process;cellular metabolic process;cellular nitrogen compound metabolic process;cellular process;cognition;learning or memory;long-term memory;memory;metabolic process;multicellular organismal process;neurological…	adenyl nucleotide binding;adenyl ribonucleotide binding;ATP binding;binding;catalytic activity;glutamate dehydrogenase (NAD+) activity;glutamate dehydrogenase [NAD(P)+] activity;GTP binding;guanyl nucleotide binding;guanyl ribonucleotide binding;nucleotide binding;oxidoreductase activity;oxidoreductase activity, acting on the CH-NH2 group of donors;oxidoreductase activity, acting on the CH-NH2 gr…	cell part;cytoplasmic part;intracellular organelle lumen;intracellular organelle part;intracellular part;membrane;membrane-enclosed lumen;mitochondrial inner membrane;mitochondrial matrix;mitochondrial membrane;mitochondrial part;organelle inner membrane;organelle lumen;organelle membrane;organelle part	Alanine, aspartate and glutamate metabolism;Arginine and proline metabolism;D-Glutamine and D-glutamate metabolism;Nitrogen metabolism;Proximal tubule bicarbonate reclamation	1	0	382.37	113.63	-0.65115	122000000000
F7CFA5;P26443	48;346	F7CFA5;P26443	Glutamate dehydrogenase 1, mitochondrial	Glud1;Glud1	GESDGSIWNPDGIDPKELEDFKLQHGSILGF	-0.307873		0.259204	0.0776246	-0.181579	-0.048669		2	___1	amine metabolic process;behavior;biological regulation;carboxylic acid metabolic process;cellular amine metabolic process;cellular amino acid metabolic process;cellular ketone metabolic process;cellular metabolic process;cellular nitrogen compound metabolic process;cellular process;cognition;learning or memory;long-term memory;memory;metabolic process;multicellular organismal process;neurological…	adenyl nucleotide binding;adenyl ribonucleotide binding;ATP binding;binding;catalytic activity;glutamate dehydrogenase (NAD+) activity;glutamate dehydrogenase [NAD(P)+] activity;GTP binding;guanyl nucleotide binding;guanyl ribonucleotide binding;nucleotide binding;oxidoreductase activity;oxidoreductase activity, acting on the CH-NH2 group of donors;oxidoreductase activity, acting on the CH-NH2 gr…	cell part;cytoplasmic part;intracellular organelle lumen;intracellular organelle part;intracellular part;membrane;membrane-enclosed lumen;mitochondrial inner membrane;mitochondrial matrix;mitochondrial membrane;mitochondrial part;organelle inner membrane;organelle lumen;organelle membrane;organelle part	Alanine, aspartate and glutamate metabolism;Arginine and proline metabolism;D-Glutamine and D-glutamate metabolism;Nitrogen metabolism;Proximal tubule bicarbonate reclamation	1	0	321.49	234.21	-0.0080127	19092000000
P26443	527	P26443	Glutamate dehydrogenase 1, mitochondrial	Glud1	YTMERSARQIMRTAMKYNLGLDLRTAAYVNA	-0.31118		0.259204	0.0776246	-0.181579	-0.051976		2	___1	amine metabolic process;behavior;biological regulation;carboxylic acid metabolic process;cellular amine metabolic process;cellular amino acid metabolic process;cellular ketone metabolic process;cellular metabolic process;cellular nitrogen compound metabolic process;cellular process;cognition;learning or memory;long-term memory;memory;metabolic process;multicellular organismal process;neurological…	adenyl nucleotide binding;adenyl ribonucleotide binding;ATP binding;binding;catalytic activity;glutamate dehydrogenase (NAD+) activity;glutamate dehydrogenase [NAD(P)+] activity;GTP binding;guanyl nucleotide binding;guanyl ribonucleotide binding;nucleotide binding;oxidoreductase activity;oxidoreductase activity, acting on the CH-NH2 group of donors;oxidoreductase activity, acting on the CH-NH2 gr…	cell part;cytoplasmic part;intracellular organelle lumen;intracellular organelle part;intracellular part;membrane;membrane-enclosed lumen;mitochondrial inner membrane;mitochondrial matrix;mitochondrial membrane;mitochondrial part;organelle inner membrane;organelle lumen;organelle membrane;organelle part	Alanine, aspartate and glutamate metabolism;Arginine and proline metabolism;D-Glutamine and D-glutamate metabolism;Nitrogen metabolism;Proximal tubule bicarbonate reclamation	1	4.36e-126	295.78	83.204	0.077996	31097000000
P26443	84	P26443	Glutamate dehydrogenase 1, mitochondrial	Glud1	MVEGFFDRGASIVEDKLVEDLKTRESEEQKR	-0.378355		0.259204	0.0776246	-0.181579	-0.119151		3	___1	amine metabolic process;behavior;biological regulation;carboxylic acid metabolic process;cellular amine metabolic process;cellular amino acid metabolic process;cellular ketone metabolic process;cellular metabolic process;cellular nitrogen compound metabolic process;cellular process;cognition;learning or memory;long-term memory;memory;metabolic process;multicellular organismal process;neurological…	adenyl nucleotide binding;adenyl ribonucleotide binding;ATP binding;binding;catalytic activity;glutamate dehydrogenase (NAD+) activity;glutamate dehydrogenase [NAD(P)+] activity;GTP binding;guanyl nucleotide binding;guanyl ribonucleotide binding;nucleotide binding;oxidoreductase activity;oxidoreductase activity, acting on the CH-NH2 group of donors;oxidoreductase activity, acting on the CH-NH2 gr…	cell part;cytoplasmic part;intracellular organelle lumen;intracellular organelle part;intracellular part;membrane;membrane-enclosed lumen;mitochondrial inner membrane;mitochondrial matrix;mitochondrial membrane;mitochondrial part;organelle inner membrane;organelle lumen;organelle membrane;organelle part	Alanine, aspartate and glutamate metabolism;Arginine and proline metabolism;D-Glutamine and D-glutamate metabolism;Nitrogen metabolism;Proximal tubule bicarbonate reclamation	1	1.88e-85	233.28	99.366	0.99282	135000000000
F7CFA5;P26443	54;352	F7CFA5;P26443	Glutamate dehydrogenase 1, mitochondrial	Glud1;Glud1	IWNPDGIDPKELEDFKLQHGSILGFPKAKVY	-0.394979		0.259204	0.0776246	-0.181579	-0.135774		3	___1	amine metabolic process;behavior;biological regulation;carboxylic acid metabolic process;cellular amine metabolic process;cellular amino acid metabolic process;cellular ketone metabolic process;cellular metabolic process;cellular nitrogen compound metabolic process;cellular process;cognition;learning or memory;long-term memory;memory;metabolic process;multicellular organismal process;neurological…	adenyl nucleotide binding;adenyl ribonucleotide binding;ATP binding;binding;catalytic activity;glutamate dehydrogenase (NAD+) activity;glutamate dehydrogenase [NAD(P)+] activity;GTP binding;guanyl nucleotide binding;guanyl ribonucleotide binding;nucleotide binding;oxidoreductase activity;oxidoreductase activity, acting on the CH-NH2 group of donors;oxidoreductase activity, acting on the CH-NH2 gr…	cell part;cytoplasmic part;intracellular organelle lumen;intracellular organelle part;intracellular part;membrane;membrane-enclosed lumen;mitochondrial inner membrane;mitochondrial matrix;mitochondrial membrane;mitochondrial part;organelle inner membrane;organelle lumen;organelle membrane;organelle part	Alanine, aspartate and glutamate metabolism;Arginine and proline metabolism;D-Glutamine and D-glutamate metabolism;Nitrogen metabolism;Proximal tubule bicarbonate reclamation	1	3.68e-195	292.45	103.5	1.9217	4568800000
F7CFA5;P26443	117;415	F7CFA5;P26443	Glutamate dehydrogenase 1, mitochondrial	Glud1;Glud1	IIAEGANGPTTPEADKIFLERNIMVIPDLYL;IIAEGANGPTTPEADKIFLERNIMVIPGASE	-0.438109	+	0.259204	0.0776246	-0.181579	-0.178905		3	___1	amine metabolic process;behavior;biological regulation;carboxylic acid metabolic process;cellular amine metabolic process;cellular amino acid metabolic process;cellular ketone metabolic process;cellular metabolic process;cellular nitrogen compound metabolic process;cellular process;cognition;learning or memory;long-term memory;memory;metabolic process;multicellular organismal process;neurological…	adenyl nucleotide binding;adenyl ribonucleotide binding;ATP binding;binding;catalytic activity;glutamate dehydrogenase (NAD+) activity;glutamate dehydrogenase [NAD(P)+] activity;GTP binding;guanyl nucleotide binding;guanyl ribonucleotide binding;nucleotide binding;oxidoreductase activity;oxidoreductase activity, acting on the CH-NH2 group of donors;oxidoreductase activity, acting on the CH-NH2 gr…	cell part;cytoplasmic part;intracellular organelle lumen;intracellular organelle part;intracellular part;membrane;membrane-enclosed lumen;mitochondrial inner membrane;mitochondrial matrix;mitochondrial membrane;mitochondrial part;organelle inner membrane;organelle lumen;organelle membrane;organelle part	Alanine, aspartate and glutamate metabolism;Arginine and proline metabolism;D-Glutamine and D-glutamate metabolism;Nitrogen metabolism;Proximal tubule bicarbonate reclamation	1	5.86e-243	297	132.67	-0.24375	30188000000
P26443	90	P26443	Glutamate dehydrogenase 1, mitochondrial	Glud1	DRGASIVEDKLVEDLKTRESEEQKRNRVRGI	-0.497538		0.259204	0.0776246	-0.181579	-0.238334		3	___1	amine metabolic process;behavior;biological regulation;carboxylic acid metabolic process;cellular amine metabolic process;cellular amino acid metabolic process;cellular ketone metabolic process;cellular metabolic process;cellular nitrogen compound metabolic process;cellular process;cognition;learning or memory;long-term memory;memory;metabolic process;multicellular organismal process;neurological…	adenyl nucleotide binding;adenyl ribonucleotide binding;ATP binding;binding;catalytic activity;glutamate dehydrogenase (NAD+) activity;glutamate dehydrogenase [NAD(P)+] activity;GTP binding;guanyl nucleotide binding;guanyl ribonucleotide binding;nucleotide binding;oxidoreductase activity;oxidoreductase activity, acting on the CH-NH2 group of donors;oxidoreductase activity, acting on the CH-NH2 gr…	cell part;cytoplasmic part;intracellular organelle lumen;intracellular organelle part;intracellular part;membrane;membrane-enclosed lumen;mitochondrial inner membrane;mitochondrial matrix;mitochondrial membrane;mitochondrial part;organelle inner membrane;organelle lumen;organelle membrane;organelle part	Alanine, aspartate and glutamate metabolism;Arginine and proline metabolism;D-Glutamine and D-glutamate metabolism;Nitrogen metabolism;Proximal tubule bicarbonate reclamation	1	9.39e-63	210.9	84.566	-0.82325	18156000000
P26443	162	P26443	Glutamate dehydrogenase 1, mitochondrial	Glud1	KGGIRYSTDVSVDEVKALASLMTYKCAVVDV	-0.511421	+	0.259204	0.0776246	-0.181579	-0.252217		2	___1	amine metabolic process;behavior;biological regulation;carboxylic acid metabolic process;cellular amine metabolic process;cellular amino acid metabolic process;cellular ketone metabolic process;cellular metabolic process;cellular nitrogen compound metabolic process;cellular process;cognition;learning or memory;long-term memory;memory;metabolic process;multicellular organismal process;neurological…	adenyl nucleotide binding;adenyl ribonucleotide binding;ATP binding;binding;catalytic activity;glutamate dehydrogenase (NAD+) activity;glutamate dehydrogenase [NAD(P)+] activity;GTP binding;guanyl nucleotide binding;guanyl ribonucleotide binding;nucleotide binding;oxidoreductase activity;oxidoreductase activity, acting on the CH-NH2 group of donors;oxidoreductase activity, acting on the CH-NH2 gr…	cell part;cytoplasmic part;intracellular organelle lumen;intracellular organelle part;intracellular part;membrane;membrane-enclosed lumen;mitochondrial inner membrane;mitochondrial matrix;mitochondrial membrane;mitochondrial part;organelle inner membrane;organelle lumen;organelle membrane;organelle part	Alanine, aspartate and glutamate metabolism;Arginine and proline metabolism;D-Glutamine and D-glutamate metabolism;Nitrogen metabolism;Proximal tubule bicarbonate reclamation	1	5.56e-252	298.81	105.67	-1.7124	8872400000
P26443	200	P26443	Glutamate dehydrogenase 1, mitochondrial	Glud1	GVKINPKNYTDNELEKITRRFTMELAKKGFI	-0.513159		0.259204	0.0776246	-0.181579	-0.253955		2	___1	amine metabolic process;behavior;biological regulation;carboxylic acid metabolic process;cellular amine metabolic process;cellular amino acid metabolic process;cellular ketone metabolic process;cellular metabolic process;cellular nitrogen compound metabolic process;cellular process;cognition;learning or memory;long-term memory;memory;metabolic process;multicellular organismal process;neurological…	adenyl nucleotide binding;adenyl ribonucleotide binding;ATP binding;binding;catalytic activity;glutamate dehydrogenase (NAD+) activity;glutamate dehydrogenase [NAD(P)+] activity;GTP binding;guanyl nucleotide binding;guanyl ribonucleotide binding;nucleotide binding;oxidoreductase activity;oxidoreductase activity, acting on the CH-NH2 group of donors;oxidoreductase activity, acting on the CH-NH2 gr…	cell part;cytoplasmic part;intracellular organelle lumen;intracellular organelle part;intracellular part;membrane;membrane-enclosed lumen;mitochondrial inner membrane;mitochondrial matrix;mitochondrial membrane;mitochondrial part;organelle inner membrane;organelle lumen;organelle membrane;organelle part	Alanine, aspartate and glutamate metabolism;Arginine and proline metabolism;D-Glutamine and D-glutamate metabolism;Nitrogen metabolism;Proximal tubule bicarbonate reclamation	1	8.97e-13	147.33	140.16	-0.22577	103260000
P26443	545	P26443	Glutamate dehydrogenase 1, mitochondrial	Glud1	LGLDLRTAAYVNAIEKVFKVYNEAGVTFT__	-0.60201		0.259204	0.0776246	-0.181579	-0.342806		2	___1	amine metabolic process;behavior;biological regulation;carboxylic acid metabolic process;cellular amine metabolic process;cellular amino acid metabolic process;cellular ketone metabolic process;cellular metabolic process;cellular nitrogen compound metabolic process;cellular process;cognition;learning or memory;long-term memory;memory;metabolic process;multicellular organismal process;neurological…	adenyl nucleotide binding;adenyl ribonucleotide binding;ATP binding;binding;catalytic activity;glutamate dehydrogenase (NAD+) activity;glutamate dehydrogenase [NAD(P)+] activity;GTP binding;guanyl nucleotide binding;guanyl ribonucleotide binding;nucleotide binding;oxidoreductase activity;oxidoreductase activity, acting on the CH-NH2 group of donors;oxidoreductase activity, acting on the CH-NH2 gr…	cell part;cytoplasmic part;intracellular organelle lumen;intracellular organelle part;intracellular part;membrane;membrane-enclosed lumen;mitochondrial inner membrane;mitochondrial matrix;mitochondrial membrane;mitochondrial part;organelle inner membrane;organelle lumen;organelle membrane;organelle part	Alanine, aspartate and glutamate metabolism;Arginine and proline metabolism;D-Glutamine and D-glutamate metabolism;Nitrogen metabolism;Proximal tubule bicarbonate reclamation	1	1.33e-36	187.11	92.151	-0.13602	3731200000
P26443	84	P26443	Glutamate dehydrogenase 1, mitochondrial	Glud1	MVEGFFDRGASIVEDKLVEDLKTRESEEQKR	-1.41212		0.259204	0.0776246	-0.181579	-1.15291		3	___2	amine metabolic process;behavior;biological regulation;carboxylic acid metabolic process;cellular amine metabolic process;cellular amino acid metabolic process;cellular ketone metabolic process;cellular metabolic process;cellular nitrogen compound metabolic process;cellular process;cognition;learning or memory;long-term memory;memory;metabolic process;multicellular organismal process;neurological…	adenyl nucleotide binding;adenyl ribonucleotide binding;ATP binding;binding;catalytic activity;glutamate dehydrogenase (NAD+) activity;glutamate dehydrogenase [NAD(P)+] activity;GTP binding;guanyl nucleotide binding;guanyl ribonucleotide binding;nucleotide binding;oxidoreductase activity;oxidoreductase activity, acting on the CH-NH2 group of donors;oxidoreductase activity, acting on the CH-NH2 gr…	cell part;cytoplasmic part;intracellular organelle lumen;intracellular organelle part;intracellular part;membrane;membrane-enclosed lumen;mitochondrial inner membrane;mitochondrial matrix;mitochondrial membrane;mitochondrial part;organelle inner membrane;organelle lumen;organelle membrane;organelle part	Alanine, aspartate and glutamate metabolism;Arginine and proline metabolism;D-Glutamine and D-glutamate metabolism;Nitrogen metabolism;Proximal tubule bicarbonate reclamation	1	1.88e-85	233.28	99.366	0.99282	135000000000
P26443	90	P26443	Glutamate dehydrogenase 1, mitochondrial	Glud1	DRGASIVEDKLVEDLKTRESEEQKRNRVRGI	-1.41212		0.259204	0.0776246	-0.181579	-1.15291		3	___2	amine metabolic process;behavior;biological regulation;carboxylic acid metabolic process;cellular amine metabolic process;cellular amino acid metabolic process;cellular ketone metabolic process;cellular metabolic process;cellular nitrogen compound metabolic process;cellular process;cognition;learning or memory;long-term memory;memory;metabolic process;multicellular organismal process;neurological…	adenyl nucleotide binding;adenyl ribonucleotide binding;ATP binding;binding;catalytic activity;glutamate dehydrogenase (NAD+) activity;glutamate dehydrogenase [NAD(P)+] activity;GTP binding;guanyl nucleotide binding;guanyl ribonucleotide binding;nucleotide binding;oxidoreductase activity;oxidoreductase activity, acting on the CH-NH2 group of donors;oxidoreductase activity, acting on the CH-NH2 gr…	cell part;cytoplasmic part;intracellular organelle lumen;intracellular organelle part;intracellular part;membrane;membrane-enclosed lumen;mitochondrial inner membrane;mitochondrial matrix;mitochondrial membrane;mitochondrial part;organelle inner membrane;organelle lumen;organelle membrane;organelle part	Alanine, aspartate and glutamate metabolism;Arginine and proline metabolism;D-Glutamine and D-glutamate metabolism;Nitrogen metabolism;Proximal tubule bicarbonate reclamation	1	9.39e-63	210.9	84.566	-0.82325	18156000000
Q5F285;F6YWB5	43;35	Q5F285	UPF0451 protein C17orf61 homolog	1810027O10Rik	HGAQFPDAYGKELFDKANKHHFLHSLALLGV	NaN		#VALUE!	NaN	NaN	#DIV/0!		2	___1			cell part;cytoplasmic part;integral to membrane;intracellular organelle part;intracellular part;intrinsic to membrane;membrane;membrane part;mitochondrial inner membrane;mitochondrial membrane;mitochondrial part;organelle inner membrane;organelle membrane;organelle part		1	0.0125148	76.478	76.478	1.0204	14846000
Q8BGL3	238	Q8BGL3		2810007J24Rik	MKERMISQSCLSNIEKHEFIMRKGITGDWKN	NaN		-1.89577	-1.11499	0.780783	#DIV/0!		3	___1		catalytic activity;sulfotransferase activity;transferase activity;transferase activity, transferring sulfur-containing groups			1	1.1e-12	99.891	99.891	-0.31212	24656000
Q8BGL3	265	Q8BGL3		2810007J24Rik	DWKNHFTVAQAEAFDKAFQEKAADFPQELFS	NaN		-1.89577	-1.11499	0.780783	#DIV/0!		3	___1		catalytic activity;sulfotransferase activity;transferase activity;transferase activity, transferring sulfur-containing groups			1	1.34e-20	141.07	141.07	-0.32547	61738000
Q8BGL3;E9QAK1	188;188	Q8BGL3		2810007J24Rik;2810007J24Rik	LRKRENILVLSYEQLKKDTRNTIKKICEFLG	NaN		-1.89577	-1.11499	0.780783	#DIV/0!		2	___1		catalytic activity;sulfotransferase activity;transferase activity;transferase activity, transferring sulfur-containing groups			1	2.51e-05	103.21	103.21	0.73929	20604000
Q8BGL3;E9QAK1;B1PQU4	107;107;107	Q8BGL3		2810007J24Rik;2810007J24Rik;2810007J24Rik	GPRLMASLLPIQLFPKSFFSSKAKVIYLIRN	NaN		-1.89577	-1.11499	0.780783	#DIV/0!		2	___1		catalytic activity;sulfotransferase activity;transferase activity;transferase activity, transferring sulfur-containing groups			1	2.14e-19	115.34	115.34	-0.2996	101130000
E9QNP0;P62984;E9Q4P0;P62983;P0CG50;Q8VC46;Q922Z8;P0CG49;Q5SX22;E9Q5F6;E9Q0Z8;E9Q9J0;F6X7C4	152;48;152;48;48;48;48;48;48;48;48;48;55	E9QNP0;P62983	Ubiquitin-60S ribosomal protein L40;Ubiquitin;60S ribosomal protein L40;Ubiquitin-40S ribosomal protein S27a;Ubiquitin;40S ribosomal protein S27a;Polyubiquitin-C;Ubiquitin;Ubiquitin-related 1;Ubiquitin-related 2;Polyubiquitin-B;Ubiquitin	2810422J05Rik;Uba52;2810422J05Rik;Rps27a;Ubc;Ubc;Ubc;Ubb;Ubb;Ubc;Ubb;Uba52;Gm7866	KEGIPPDQQRLIFAGKQLEDGRTLSDYNIQK	NaN		#VALUE!	NaN	NaN	#DIV/0!		2	___1	adipose tissue development;anatomical structure development;biological regulation;biosynthetic process;cell cycle phase;cell cycle process;cell development;cellular biosynthetic process;cellular developmental process;cellular homeostasis;cellular macromolecule biosynthetic process;cellular macromolecule metabolic process;cellular metabolic process;cellular process;cellular protein metabolic proce…	binding;cation binding;ion binding;metal ion binding;structural constituent of ribosome;structural molecule activity	cell part;cytoplasmic part;cytosol;cytosolic large ribosomal subunit;cytosolic small ribosomal subunit;intracellular non-membrane-bounded organelle;intracellular organelle;intracellular organelle part;intracellular part;large ribosomal subunit;macromolecular complex;non-membrane-bounded organelle;nuclear part;nucleoplasm;organelle;organelle part;ribonucleoprotein complex;ribosome;small ribosomal …	Parkinson's disease;PPAR signaling pathway;Ribosome	1	0.00689246	83.617	83.617	-0.17263	4121500
Q99K67	70	Q99K67	Alpha-aminoadipic semialdehyde synthase, mitochondrial;Lysine ketoglutarate reductase;Saccharopine dehydrogenase	Aass	YKVLIQPSNRRAIHDKEYVRAGGILQEDITE	NaN		1.18477	-0.73877	-1.92355	#DIV/0!		3	___1	acetyl-CoA metabolic process;amine catabolic process;amine metabolic process;aspartate family amino acid catabolic process;aspartate family amino acid metabolic process;carboxylic acid catabolic process;carboxylic acid metabolic process;catabolic process;cellular amine metabolic process;cellular amino acid catabolic process;cellular amino acid metabolic process;cellular catabolic process;cellular…	catalytic activity;oxidoreductase activity;oxidoreductase activity, acting on the CH-NH group of donors;oxidoreductase activity, acting on the CH-NH group of donors, NAD or NADP as acceptor;saccharopine dehydrogenase (NAD+, L-glutamate-forming) activity;saccharopine dehydrogenase (NADP+, L-lysine-forming) activity;saccharopine dehydrogenase activity	cell part;cytoplasmic part;intracellular membrane-bounded organelle;intracellular organelle;intracellular part;membrane-bounded organelle;mitochondrion;organelle	Lysine biosynthesis;Lysine degradation	1	0.00104605	98.048	86.624	0.4542	309260000
Q99K67	833	Q99K67	Alpha-aminoadipic semialdehyde synthase, mitochondrial;Lysine ketoglutarate reductase;Saccharopine dehydrogenase	Aass	FSKHLVSKLSYGPEEKDMIVMRDSFGIRHPS	NaN		1.18477	-0.73877	-1.92355	#DIV/0!		2	___1	acetyl-CoA metabolic process;amine catabolic process;amine metabolic process;aspartate family amino acid catabolic process;aspartate family amino acid metabolic process;carboxylic acid catabolic process;carboxylic acid metabolic process;catabolic process;cellular amine metabolic process;cellular amino acid catabolic process;cellular amino acid metabolic process;cellular catabolic process;cellular…	catalytic activity;oxidoreductase activity;oxidoreductase activity, acting on the CH-NH group of donors;oxidoreductase activity, acting on the CH-NH group of donors, NAD or NADP as acceptor;saccharopine dehydrogenase (NAD+, L-glutamate-forming) activity;saccharopine dehydrogenase (NADP+, L-lysine-forming) activity;saccharopine dehydrogenase activity	cell part;cytoplasmic part;intracellular membrane-bounded organelle;intracellular organelle;intracellular part;membrane-bounded organelle;mitochondrion;organelle	Lysine biosynthesis;Lysine degradation	1	0.000743938	91.441	91.441	0.04901	9221500
Q99K67;F6VMP2	539;129	Q99K67	Alpha-aminoadipic semialdehyde synthase, mitochondrial;Lysine ketoglutarate reductase;Saccharopine dehydrogenase	Aass;Aass	YNINPVSLTVGKQEAKLQSLVESQDLVISLL	NaN		1.18477	-0.73877	-1.92355	#DIV/0!		3	___1	acetyl-CoA metabolic process;amine catabolic process;amine metabolic process;aspartate family amino acid catabolic process;aspartate family amino acid metabolic process;carboxylic acid catabolic process;carboxylic acid metabolic process;catabolic process;cellular amine metabolic process;cellular amino acid catabolic process;cellular amino acid metabolic process;cellular catabolic process;cellular…	catalytic activity;oxidoreductase activity;oxidoreductase activity, acting on the CH-NH group of donors;oxidoreductase activity, acting on the CH-NH group of donors, NAD or NADP as acceptor;saccharopine dehydrogenase (NAD+, L-glutamate-forming) activity;saccharopine dehydrogenase (NADP+, L-lysine-forming) activity;saccharopine dehydrogenase activity	cell part;cytoplasmic part;intracellular membrane-bounded organelle;intracellular organelle;intracellular part;membrane-bounded organelle;mitochondrion;organelle	Lysine biosynthesis;Lysine degradation	1	3.68e-29	113.91	113.91	1.1359	98692000
P61922;P61922-2	252;252	P61922	4-aminobutyrate aminotransferase, mitochondrial	Abat	DIPSFDWPIAPFPRLKYPLEEFTTDNQQEEA	NaN		0.568905	-0.474231	-1.04314	#DIV/0!		3	___1	adult behavior;amine metabolic process;behavior;behavioral response to cocaine;biological regulation;carboxylic acid metabolic process;catabolic process;cellular amine metabolic process;cellular amino acid metabolic process;cellular catabolic process;cellular ketone metabolic process;cellular metabolic process;cellular nitrogen compound metabolic process;cellular process;copulation;gamma-aminobut…	(S)-3-amino-2-methylpropionate transaminase activity;4-aminobutyrate transaminase activity;binding;catalytic activity;cofactor binding;enzyme binding;identical protein binding;protein binding;protein dimerization activity;protein homodimerization activity;pyridoxal phosphate binding;succinate-semialdehyde dehydrogenase binding;transaminase activity;transferase activity;transferase activity, trans…	4-aminobutyrate transaminase complex;cell part;cell projection;cytoplasmic part;intracellular membrane-bounded organelle;intracellular organelle;intracellular organelle lumen;intracellular organelle part;intracellular part;macromolecular complex;membrane-bounded organelle;membrane-enclosed lumen;mitochondrial matrix;mitochondrial part;mitochondrion;neuron projection;organelle;organelle lumen;orga…	Alanine, aspartate and glutamate metabolism;beta-Alanine metabolism;Butanoate metabolism;Propanoate metabolism;Valine, leucine and isoleucine degradation	1	2.07e-32	152.68	152.68	0.49488	138640000
P61922;P61922-2	452;396	P61922	4-aminobutyrate aminotransferase, mitochondrial	Abat	GTFCSFDTPDEAIRNKLILIARNKGVVLGGC	NaN		0.568905	-0.474231	-1.04314	#DIV/0!		2	___1	adult behavior;amine metabolic process;behavior;behavioral response to cocaine;biological regulation;carboxylic acid metabolic process;catabolic process;cellular amine metabolic process;cellular amino acid metabolic process;cellular catabolic process;cellular ketone metabolic process;cellular metabolic process;cellular nitrogen compound metabolic process;cellular process;copulation;gamma-aminobut…	(S)-3-amino-2-methylpropionate transaminase activity;4-aminobutyrate transaminase activity;binding;catalytic activity;cofactor binding;enzyme binding;identical protein binding;protein binding;protein dimerization activity;protein homodimerization activity;pyridoxal phosphate binding;succinate-semialdehyde dehydrogenase binding;transaminase activity;transferase activity;transferase activity, trans…	4-aminobutyrate transaminase complex;cell part;cell projection;cytoplasmic part;intracellular membrane-bounded organelle;intracellular organelle;intracellular organelle lumen;intracellular organelle part;intracellular part;macromolecular complex;membrane-bounded organelle;membrane-enclosed lumen;mitochondrial matrix;mitochondrial part;mitochondrion;neuron projection;organelle;organelle lumen;orga…	Alanine, aspartate and glutamate metabolism;beta-Alanine metabolism;Butanoate metabolism;Propanoate metabolism;Valine, leucine and isoleucine degradation	1	0.0120596	77.318	77.318	-0.27897	7405700
Q9JI39	341	Q9JI39	ATP-binding cassette sub-family B member 10, mitochondrial	Abcb10	IRTIRAFGKEMTEVEKYTGRVDQLLQLAQKE	NaN		-0.271227	0.510433	0.78166	#DIV/0!		2	___1		active transmembrane transporter activity;adenyl nucleotide binding;adenyl ribonucleotide binding;ATP binding;ATPase activity;ATPase activity, coupled;ATPase activity, coupled to movement of substances;ATPase activity, coupled to transmembrane movement of substances;binding;catalytic activity;hydrolase activity;hydrolase activity, acting on acid anhydrides;hydrolase activity, acting on acid anhyd…	cell part;cytoplasmic part;integral to membrane;integral to mitochondrial membrane;integral to organelle membrane;intracellular organelle part;intracellular part;intrinsic to membrane;intrinsic to organelle membrane;membrane;membrane part;mitochondrial inner membrane;mitochondrial membrane;mitochondrial membrane part;mitochondrial part;organelle inner membrane;organelle membrane;organelle part	ABC transporters	1	0.0200722	75.479	75.479	0.66477	7712600
Q61102	350	Q61102	ATP-binding cassette sub-family B member 7, mitochondrial	Abcb7	DSLLNYETVKYFNNEKYEAQRYDGFLKTYET	NaN		-0.0390535	-0.026812	0.0122415	#DIV/0!		2	___1	biological regulation;cation homeostasis;cellular cation homeostasis;cellular chemical homeostasis;cellular homeostasis;cellular ion homeostasis;cellular iron ion homeostasis;cellular metal ion homeostasis;cellular process;chemical homeostasis;homeostatic process;ion homeostasis;iron ion homeostasis;metal ion homeostasis;regulation of biological quality	active transmembrane transporter activity;adenyl nucleotide binding;adenyl ribonucleotide binding;ATP binding;ATPase activity;ATPase activity, coupled;ATPase activity, coupled to movement of substances;ATPase activity, coupled to transmembrane movement of substances;binding;catalytic activity;hydrolase activity;hydrolase activity, acting on acid anhydrides;hydrolase activity, acting on acid anhyd…	cell part;cytoplasmic part;integral to membrane;intracellular organelle part;intracellular part;intrinsic to membrane;membrane;membrane part;mitochondrial inner membrane;mitochondrial membrane;mitochondrial part;organelle inner membrane;organelle membrane;organelle part	ABC transporters	1	0.000991029	97.911	97.911	0.027915	26784000
P61222	191	P61222	ATP-binding cassette sub-family E member 1	Abce1	IPKAAKGTVGSILDRKDETKTQAIVCQQLDL	NaN		-0.127689	-0.187426	-0.0597367	#DIV/0!		3	___1	ATP catabolic process;ATP metabolic process;catabolic process;cellular catabolic process;cellular metabolic process;cellular nitrogen compound catabolic process;cellular nitrogen compound metabolic process;cellular process;heterocycle catabolic process;heterocycle metabolic process;metabolic process;nitrogen compound metabolic process;nucleobase-containing compound catabolic process;nucleobase-co…	adenyl nucleotide binding;adenyl ribonucleotide binding;ATP binding;ATPase activity;binding;catalytic activity;electron carrier activity;hydrolase activity;hydrolase activity, acting on acid anhydrides;hydrolase activity, acting on acid anhydrides, in phosphorus-containing anhydrides;iron-sulfur cluster binding;metal cluster binding;nucleoside-triphosphatase activity;nucleotide binding;purine nuc…	cell part;cytoplasmic part;intracellular membrane-bounded organelle;intracellular organelle;intracellular part;membrane-bounded organelle;mitochondrion;organelle		1	4.41e-05	85.837	82.908	-0.29609	27085000
Q8BLD7;Q921H8	107;237	Q8BLD7;Q921H8	3-ketoacyl-CoA thiolase A, peroxisomal	Acaa1a;Acaa1a	EIVPVTTTVLDDKGDKKTITVSQDEGVRPST	NaN		#VALUE!	NaN	-1.93266	#DIV/0!		3	___1	carboxylic acid metabolic process;cellular ketone metabolic process;cellular lipid metabolic process;cellular metabolic process;cellular process;fatty acid metabolic process;lipid metabolic process;metabolic process;monocarboxylic acid metabolic process;organic acid metabolic process;oxoacid metabolic process;primary metabolic process;small molecule metabolic process	acetyl-CoA C-acetyltransferase activity;acetyl-CoA C-acyltransferase activity;acetyltransferase activity;C-acetyltransferase activity;C-acyltransferase activity;catalytic activity;transferase activity;transferase activity, transferring acyl groups;transferase activity, transferring acyl groups other than amino-acyl groups	cell part;cytoplasmic part;intracellular membrane-bounded organelle;intracellular organelle;intracellular part;membrane-bounded organelle;microbody;mitochondrion;organelle;peroxisome	Benzoate degradation;Biosynthesis of unsaturated fatty acids;Fatty acid metabolism;Peroxisome;PPAR signaling pathway;Valine, leucine and isoleucine degradation	0.92722	8.03e-09	95.814	89.846	-0.58876	121010000
Q8BWT1	340	Q8BWT1	3-ketoacyl-CoA thiolase, mitochondrial	Acaa2	PQFLSVQKALDLDPSKTNVSGGAIALGHPLG	NaN		0.14361	-0.125687	-0.269297	#DIV/0!		3	___1	biological regulation;carboxylic acid metabolic process;cellular ketone metabolic process;cellular lipid metabolic process;cellular metabolic process;cellular process;fatty acid metabolic process;lipid metabolic process;metabolic process;monocarboxylic acid metabolic process;negative regulation of apoptosis;negative regulation of biological process;negative regulation of cell death;negative regul…	acetyl-CoA C-acyltransferase activity;C-acyltransferase activity;catalytic activity;transferase activity;transferase activity, transferring acyl groups;transferase activity, transferring acyl groups other than amino-acyl groups	cell part;cytoplasmic part;intracellular organelle part;intracellular part;membrane;mitochondrial inner membrane;mitochondrial membrane;mitochondrial part;organelle inner membrane;organelle membrane;organelle part	Benzoate degradation;Fatty acid elongation in mitochondria;Fatty acid metabolism;Valine, leucine and isoleucine degradation	1	1.76e-17	109.45	84.515	-0.67451	80829000
Q8BWT1	13	Q8BWT1	3-ketoacyl-CoA thiolase, mitochondrial	Acaa2	___MALLRGVFIVAAKRTPFGAYGGLLKDFS	NaN		0.14361	-0.125687	-0.269297	#DIV/0!		2	___1	biological regulation;carboxylic acid metabolic process;cellular ketone metabolic process;cellular lipid metabolic process;cellular metabolic process;cellular process;fatty acid metabolic process;lipid metabolic process;metabolic process;monocarboxylic acid metabolic process;negative regulation of apoptosis;negative regulation of biological process;negative regulation of cell death;negative regul…	acetyl-CoA C-acyltransferase activity;C-acyltransferase activity;catalytic activity;transferase activity;transferase activity, transferring acyl groups;transferase activity, transferring acyl groups other than amino-acyl groups	cell part;cytoplasmic part;intracellular organelle part;intracellular part;membrane;mitochondrial inner membrane;mitochondrial membrane;mitochondrial part;organelle inner membrane;organelle membrane;organelle part	Benzoate degradation;Fatty acid elongation in mitochondria;Fatty acid metabolism;Valine, leucine and isoleucine degradation	1	0.00325354	80.165	80.165	-0.52945	33292000
Q80XL6;D3YTQ5	166;48	Q80XL6	Acyl-CoA dehydrogenase family member 11	Acad11;Acad11	LAWLHSLDIRSLKLDKYGTGVGYCKRQVSTW	NaN		0.630317	0.128882	-0.501434	#DIV/0!		2	___1	carboxylic acid catabolic process;carboxylic acid metabolic process;catabolic process;cellular catabolic process;cellular ketone metabolic process;cellular lipid catabolic process;cellular lipid metabolic process;cellular metabolic process;cellular process;fatty acid beta-oxidation;fatty acid beta-oxidation using acyl-CoA dehydrogenase;fatty acid catabolic process;fatty acid metabolic process;fat…	acyl-CoA dehydrogenase activity;binding;catalytic activity;coenzyme binding;cofactor binding;flavin adenine dinucleotide binding;medium-chain-acyl-CoA dehydrogenase activity;oxidoreductase activity;oxidoreductase activity, acting on the CH-CH group of donors;transferase activity;transferase activity, transferring phosphorus-containing groups;very long-chain-acyl-CoA dehydrogenase activity	cell part;cytoplasmic part;intracellular membrane-bounded organelle;intracellular organelle;intracellular organelle part;intracellular part;membrane;membrane-bounded organelle;microbody;mitochondrial membrane;mitochondrial part;mitochondrion;nucleus;organelle;organelle membrane;organelle part;peroxisome		1	0.000273615	91.914	91.914	-0.77233	14371000
Q80XL6;D3YTQ5	390;272	Q80XL6	Acyl-CoA dehydrogenase family member 11	Acad11;Acad11	SRRGQEVLTRVKQFMKQHVFPAEKEVAEYYA	NaN		0.630317	0.128882	-0.501434	#DIV/0!		3	___1	carboxylic acid catabolic process;carboxylic acid metabolic process;catabolic process;cellular catabolic process;cellular ketone metabolic process;cellular lipid catabolic process;cellular lipid metabolic process;cellular metabolic process;cellular process;fatty acid beta-oxidation;fatty acid beta-oxidation using acyl-CoA dehydrogenase;fatty acid catabolic process;fatty acid metabolic process;fat…	acyl-CoA dehydrogenase activity;binding;catalytic activity;coenzyme binding;cofactor binding;flavin adenine dinucleotide binding;medium-chain-acyl-CoA dehydrogenase activity;oxidoreductase activity;oxidoreductase activity, acting on the CH-CH group of donors;transferase activity;transferase activity, transferring phosphorus-containing groups;very long-chain-acyl-CoA dehydrogenase activity	cell part;cytoplasmic part;intracellular membrane-bounded organelle;intracellular organelle;intracellular organelle part;intracellular part;membrane;membrane-bounded organelle;microbody;mitochondrial membrane;mitochondrial part;mitochondrion;nucleus;organelle;organelle membrane;organelle part;peroxisome		1	0.000327955	98.368	98.368	-0.16265	34542000
P51174	92	P51174	Long-chain specific acyl-CoA dehydrogenase, mitochondrial	Acadl	TEWEKAGEVSREVWEKAGKQGLLGINIAEKH	NaN		0.424019	0.559596	0.135577	#DIV/0!		2	___1	amine catabolic process;amine metabolic process;betaine catabolic process;betaine metabolic process;biological regulation;carboxylic acid catabolic process;carboxylic acid metabolic process;carnitine catabolic process;carnitine metabolic process;carnitine metabolic process, CoA-linked;catabolic process;cellular amine metabolic process;cellular amino acid catabolic process;cellular amino acid meta…	acyl-CoA dehydrogenase activity;acyl-CoA oxidase activity;binding;carboxylic acid binding;catalytic activity;coenzyme binding;cofactor binding;fatty acid binding;fatty-acyl-CoA binding;flavin adenine dinucleotide binding;lipid binding;long-chain-acyl-CoA dehydrogenase activity;monocarboxylic acid binding;oxidoreductase activity;oxidoreductase activity, acting on the CH-CH group of donors;oxidored…	cell part;cytoplasmic part;intracellular membrane-bounded organelle;intracellular organelle;intracellular organelle lumen;intracellular organelle part;intracellular part;membrane;membrane-bounded organelle;membrane-enclosed lumen;mitochondrial matrix;mitochondrial membrane;mitochondrial part;mitochondrion;organelle;organelle lumen;organelle membrane;organelle part	Fatty acid metabolism;PPAR signaling pathway	1	4.9e-11	130.06	89.466	0.50421	107710000
P45952	301	P45952	Medium-chain specific acyl-CoA dehydrogenase, mitochondrial	Acadm	AGAVGLAQRALDEATKYALDRKTFGKLLVEH	NaN		0.774379	0.191668	-0.582711	#DIV/0!		3	___1	amine biosynthetic process;amine metabolic process;anatomical structure development;betaine biosynthetic process;betaine metabolic process;biological regulation;biosynthetic process;carbohydrate biosynthetic process;carbohydrate metabolic process;carboxylic acid biosynthetic process;carboxylic acid catabolic process;carboxylic acid metabolic process;cardiac cell differentiation;cardiac muscle cel…	acyl-CoA dehydrogenase activity;binding;catalytic activity;coenzyme binding;cofactor binding;flavin adenine dinucleotide binding;medium-chain-acyl-CoA dehydrogenase activity;oxidoreductase activity;oxidoreductase activity, acting on the CH-CH group of donors	axon;cell part;cell projection;cytoplasmic part;intracellular membrane-bounded organelle;intracellular organelle;intracellular organelle lumen;intracellular organelle part;intracellular part;membrane-bounded organelle;membrane-enclosed lumen;mitochondrial matrix;mitochondrial part;mitochondrion;neuron projection;organelle;organelle lumen;organelle part	beta-Alanine metabolism;Fatty acid metabolism;PPAR signaling pathway;Propanoate metabolism;Valine, leucine and isoleucine degradation	1	1.2e-06	117.07	103.85	-0.3742	33897000
P45952	217	P45952	Medium-chain specific acyl-CoA dehydrogenase, mitochondrial	Acadm	FLLARSNPDPKVPASKAFTGFIVEADTPGIH	NaN		0.774379	0.191668	-0.582711	#DIV/0!		3	___1	amine biosynthetic process;amine metabolic process;anatomical structure development;betaine biosynthetic process;betaine metabolic process;biological regulation;biosynthetic process;carbohydrate biosynthetic process;carbohydrate metabolic process;carboxylic acid biosynthetic process;carboxylic acid catabolic process;carboxylic acid metabolic process;cardiac cell differentiation;cardiac muscle cel…	acyl-CoA dehydrogenase activity;binding;catalytic activity;coenzyme binding;cofactor binding;flavin adenine dinucleotide binding;medium-chain-acyl-CoA dehydrogenase activity;oxidoreductase activity;oxidoreductase activity, acting on the CH-CH group of donors	axon;cell part;cell projection;cytoplasmic part;intracellular membrane-bounded organelle;intracellular organelle;intracellular organelle lumen;intracellular organelle part;intracellular part;membrane-bounded organelle;membrane-enclosed lumen;mitochondrial matrix;mitochondrial part;mitochondrion;neuron projection;organelle;organelle lumen;organelle part	beta-Alanine metabolism;Fatty acid metabolism;PPAR signaling pathway;Propanoate metabolism;Valine, leucine and isoleucine degradation	1	5.48e-07	86.557	86.557	0.78216	19547000
Q07417	51	Q07417	Short-chain specific acyl-CoA dehydrogenase, mitochondrial	Acads	ETHQMLRQTCRDFAEKELVPIAAQLDREHLF	NaN		0.0779092	-0.242613	-0.320522	#DIV/0!		4	___1	butyrate catabolic process;butyrate metabolic process;carboxylic acid catabolic process;carboxylic acid metabolic process;catabolic process;cellular catabolic process;cellular component assembly;cellular component organization;cellular component organization or biogenesis;cellular ketone metabolic process;cellular lipid catabolic process;cellular lipid metabolic process;cellular metabolic process…	acyl-CoA dehydrogenase activity;binding;butyryl-CoA dehydrogenase activity;carboxylic acid binding;catalytic activity;coenzyme binding;cofactor binding;fatty acid binding;fatty-acyl-CoA binding;flavin adenine dinucleotide binding;lipid binding;monocarboxylic acid binding;oxidoreductase activity;oxidoreductase activity, acting on the CH-CH group of donors	cell part;cytoplasmic part;intracellular membrane-bounded organelle;intracellular organelle;intracellular organelle lumen;intracellular organelle part;intracellular part;membrane;membrane-bounded organelle;membrane-enclosed lumen;mitochondrial matrix;mitochondrial membrane;mitochondrial part;mitochondrion;organelle;organelle lumen;organelle membrane;organelle part	Butanoate metabolism;Fatty acid metabolism;Valine, leucine and isoleucine degradation	1	4.12e-20	107.19	107.19	0.13386	71057000
Q07417	262	Q07417	Short-chain specific acyl-CoA dehydrogenase, mitochondrial	Acads	RIPKENLLGEPGMGFKIAMQTLDMGRIGIAS	NaN		0.0779092	-0.242613	-0.320522	#DIV/0!		3	___1	butyrate catabolic process;butyrate metabolic process;carboxylic acid catabolic process;carboxylic acid metabolic process;catabolic process;cellular catabolic process;cellular component assembly;cellular component organization;cellular component organization or biogenesis;cellular ketone metabolic process;cellular lipid catabolic process;cellular lipid metabolic process;cellular metabolic process…	acyl-CoA dehydrogenase activity;binding;butyryl-CoA dehydrogenase activity;carboxylic acid binding;catalytic activity;coenzyme binding;cofactor binding;fatty acid binding;fatty-acyl-CoA binding;flavin adenine dinucleotide binding;lipid binding;monocarboxylic acid binding;oxidoreductase activity;oxidoreductase activity, acting on the CH-CH group of donors	cell part;cytoplasmic part;intracellular membrane-bounded organelle;intracellular organelle;intracellular organelle lumen;intracellular organelle part;intracellular part;membrane;membrane-bounded organelle;membrane-enclosed lumen;mitochondrial matrix;mitochondrial membrane;mitochondrial part;mitochondrion;organelle;organelle lumen;organelle membrane;organelle part	Butanoate metabolism;Fatty acid metabolism;Valine, leucine and isoleucine degradation	1	3.25e-90	185.3	185.3	0.52184	185550000
Q9DBL1	426	Q9DBL1	Short/branched chain specific acyl-CoA dehydrogenase, mitochondrial	Acadsb	TIYEGASNIQLNTIAKHIDAEY_________	NaN		-0.424518	-0.804366	-0.379848	#DIV/0!		3	___1	carboxylic acid metabolic process;cellular ketone metabolic process;cellular lipid metabolic process;cellular metabolic process;cellular process;fatty acid metabolic process;lipid metabolic process;metabolic process;monocarboxylic acid metabolic process;organic acid metabolic process;oxoacid metabolic process;primary metabolic process;small molecule metabolic process	acyl-CoA dehydrogenase activity;binding;catalytic activity;coenzyme binding;cofactor binding;flavin adenine dinucleotide binding;oxidoreductase activity;oxidoreductase activity, acting on the CH-CH group of donors	cell part;cytoplasmic part;intracellular membrane-bounded organelle;intracellular organelle;intracellular organelle lumen;intracellular organelle part;intracellular part;membrane-bounded organelle;membrane-enclosed lumen;mitochondrial matrix;mitochondrial part;mitochondrion;organelle;organelle lumen;organelle part	Fatty acid metabolism;Valine, leucine and isoleucine degradation	1	2.01e-11	98.684	95.624	-0.7373	194300000
Q8QZT1	178	Q8QZT1	Acetyl-CoA acetyltransferase, mitochondrial	Acat1	GATPYGGVKLEDLIVKDGLTDVYNKIHMGNC	NaN		0.48976	0.852043	0.362282	#DIV/0!		2	___1	adipose tissue development;anatomical structure development;brain development;cellular component assembly;cellular component organization;cellular component organization or biogenesis;developmental process;liver development;macromolecular complex assembly;macromolecular complex subunit organization;metanephric proximal convoluted tubule development;organ development;protein complex assembly;prote…	acetyl-CoA C-acetyltransferase activity;acetyl-CoA C-acyltransferase activity;acetyltransferase activity;binding;C-acetyltransferase activity;C-acyltransferase activity;catalytic activity;cation binding;coenzyme binding;cofactor binding;ion binding;metal ion binding;transferase activity;transferase activity, transferring acyl groups;transferase activity, transferring acyl groups other than amino-…	cell part;cytoplasmic part;intracellular organelle lumen;intracellular organelle part;intracellular part;membrane;membrane-enclosed lumen;mitochondrial inner membrane;mitochondrial matrix;mitochondrial membrane;mitochondrial part;organelle inner membrane;organelle lumen;organelle membrane;organelle part	Benzoate degradation;Butanoate metabolism;Carbon fixation pathways in prokaryotes;Fatty acid metabolism;Glyoxylate and dicarboxylate metabolism;Lysine degradation;Propanoate metabolism;Pyruvate metabolism;Synthesis and degradation of ketone bodies;Terpenoid backbone biosynthesis;Tryptophan metabolism;Two-component system;Valine, leucine and isoleucine degradation	1	4.23e-49	187	166.92	0.87881	363730000
Q8QZT1	400	Q8QZT1	Acetyl-CoA acetyltransferase, mitochondrial	Acat1	GMSGARIVVHMAHALKPGEFGLASICNGGGG	NaN		0.48976	0.852043	0.362282	#DIV/0!		4	___1	adipose tissue development;anatomical structure development;brain development;cellular component assembly;cellular component organization;cellular component organization or biogenesis;developmental process;liver development;macromolecular complex assembly;macromolecular complex subunit organization;metanephric proximal convoluted tubule development;organ development;protein complex assembly;prote…	acetyl-CoA C-acetyltransferase activity;acetyl-CoA C-acyltransferase activity;acetyltransferase activity;binding;C-acetyltransferase activity;C-acyltransferase activity;catalytic activity;cation binding;coenzyme binding;cofactor binding;ion binding;metal ion binding;transferase activity;transferase activity, transferring acyl groups;transferase activity, transferring acyl groups other than amino-…	cell part;cytoplasmic part;intracellular organelle lumen;intracellular organelle part;intracellular part;membrane;membrane-enclosed lumen;mitochondrial inner membrane;mitochondrial matrix;mitochondrial membrane;mitochondrial part;organelle inner membrane;organelle lumen;organelle membrane;organelle part	Benzoate degradation;Butanoate metabolism;Carbon fixation pathways in prokaryotes;Fatty acid metabolism;Glyoxylate and dicarboxylate metabolism;Lysine degradation;Propanoate metabolism;Pyruvate metabolism;Synthesis and degradation of ketone bodies;Terpenoid backbone biosynthesis;Tryptophan metabolism;Two-component system;Valine, leucine and isoleucine degradation	1	2.21e-30	114.63	114.63	0.14578	30451000
Q8QZT1	370	Q8QZT1	Acetyl-CoA acetyltransferase, mitochondrial	Acat1	VVVLANIKMLEIDPQKVNIHGGAVSLGHPIG	NaN		0.48976	0.852043	0.362282	#DIV/0!		4	___1	adipose tissue development;anatomical structure development;brain development;cellular component assembly;cellular component organization;cellular component organization or biogenesis;developmental process;liver development;macromolecular complex assembly;macromolecular complex subunit organization;metanephric proximal convoluted tubule development;organ development;protein complex assembly;prote…	acetyl-CoA C-acetyltransferase activity;acetyl-CoA C-acyltransferase activity;acetyltransferase activity;binding;C-acetyltransferase activity;C-acyltransferase activity;catalytic activity;cation binding;coenzyme binding;cofactor binding;ion binding;metal ion binding;transferase activity;transferase activity, transferring acyl groups;transferase activity, transferring acyl groups other than amino-…	cell part;cytoplasmic part;intracellular organelle lumen;intracellular organelle part;intracellular part;membrane;membrane-enclosed lumen;mitochondrial inner membrane;mitochondrial matrix;mitochondrial membrane;mitochondrial part;organelle inner membrane;organelle lumen;organelle membrane;organelle part	Benzoate degradation;Butanoate metabolism;Carbon fixation pathways in prokaryotes;Fatty acid metabolism;Glyoxylate and dicarboxylate metabolism;Lysine degradation;Propanoate metabolism;Pyruvate metabolism;Synthesis and degradation of ketone bodies;Terpenoid backbone biosynthesis;Tryptophan metabolism;Two-component system;Valine, leucine and isoleucine degradation	1	7.27e-33	133.44	133.44	1.7154	164790000
Q8QZT1	63	Q8QZT1	Acetyl-CoA acetyltransferase, mitochondrial	Acat1	PIGSFLGSLASQPATKLGTAAIQGAIEKAGI	NaN		0.48976	0.852043	0.362282	#DIV/0!		3	___1	adipose tissue development;anatomical structure development;brain development;cellular component assembly;cellular component organization;cellular component organization or biogenesis;developmental process;liver development;macromolecular complex assembly;macromolecular complex subunit organization;metanephric proximal convoluted tubule development;organ development;protein complex assembly;prote…	acetyl-CoA C-acetyltransferase activity;acetyl-CoA C-acyltransferase activity;acetyltransferase activity;binding;C-acetyltransferase activity;C-acyltransferase activity;catalytic activity;cation binding;coenzyme binding;cofactor binding;ion binding;metal ion binding;transferase activity;transferase activity, transferring acyl groups;transferase activity, transferring acyl groups other than amino-…	cell part;cytoplasmic part;intracellular organelle lumen;intracellular organelle part;intracellular part;membrane;membrane-enclosed lumen;mitochondrial inner membrane;mitochondrial matrix;mitochondrial membrane;mitochondrial part;organelle inner membrane;organelle lumen;organelle membrane;organelle part	Benzoate degradation;Butanoate metabolism;Carbon fixation pathways in prokaryotes;Fatty acid metabolism;Glyoxylate and dicarboxylate metabolism;Lysine degradation;Propanoate metabolism;Pyruvate metabolism;Synthesis and degradation of ketone bodies;Terpenoid backbone biosynthesis;Tryptophan metabolism;Two-component system;Valine, leucine and isoleucine degradation	1	4.26e-26	117.57	117.57	0.23977	169360000
Q8QZT1	335	Q8QZT1	Acetyl-CoA acetyltransferase, mitochondrial	Acat1	IDFPLAPAYAVPKVLKYAGLKKEDIAMWEVN	NaN		0.48976	0.852043	0.362282	#DIV/0!		2	___1	adipose tissue development;anatomical structure development;brain development;cellular component assembly;cellular component organization;cellular component organization or biogenesis;developmental process;liver development;macromolecular complex assembly;macromolecular complex subunit organization;metanephric proximal convoluted tubule development;organ development;protein complex assembly;prote…	acetyl-CoA C-acetyltransferase activity;acetyl-CoA C-acyltransferase activity;acetyltransferase activity;binding;C-acetyltransferase activity;C-acyltransferase activity;catalytic activity;cation binding;coenzyme binding;cofactor binding;ion binding;metal ion binding;transferase activity;transferase activity, transferring acyl groups;transferase activity, transferring acyl groups other than amino-…	cell part;cytoplasmic part;intracellular organelle lumen;intracellular organelle part;intracellular part;membrane;membrane-enclosed lumen;mitochondrial inner membrane;mitochondrial matrix;mitochondrial membrane;mitochondrial part;organelle inner membrane;organelle lumen;organelle membrane;organelle part	Benzoate degradation;Butanoate metabolism;Carbon fixation pathways in prokaryotes;Fatty acid metabolism;Glyoxylate and dicarboxylate metabolism;Lysine degradation;Propanoate metabolism;Pyruvate metabolism;Synthesis and degradation of ketone bodies;Terpenoid backbone biosynthesis;Tryptophan metabolism;Two-component system;Valine, leucine and isoleucine degradation	1	0.0015811	89.296	89.296	-0.047499	49507000
Q80X81;F2Z459;Q8CAY6;G3XA25	217;217;217;185	Q80X81;Q8CAY6	Acetyl-CoA acetyltransferase, cytosolic	Acat3;Acat3;Acat2;Acat2	IVPVLVSSRKGLTEVKIDEFPRHGSNLEAMG	NaN		0.333862	-0.149711	-0.483572	#DIV/0!		2	___1		acetyl-CoA C-acetyltransferase activity;acetyl-CoA C-acyltransferase activity;acetyltransferase activity;C-acetyltransferase activity;C-acyltransferase activity;catalytic activity;transferase activity;transferase activity, transferring acyl groups;transferase activity, transferring acyl groups other than amino-acyl groups	cell part;cytoplasmic part;intracellular membrane-bounded organelle;intracellular organelle;intracellular part;membrane-bounded organelle;mitochondrion;organelle	Benzoate degradation;Butanoate metabolism;Carbon fixation pathways in prokaryotes;Fatty acid metabolism;Glyoxylate and dicarboxylate metabolism;Lysine degradation;Propanoate metabolism;Pyruvate metabolism;Synthesis and degradation of ketone bodies;Terpenoid backbone biosynthesis;Tryptophan metabolism;Two-component system;Valine, leucine and isoleucine degradation	1	0.000517485	100.19	100.19	0.067364	8565700
Q80X81;F2Z459;Q8CAY6;G3XA25	233;233;233;201	Q80X81;Q8CAY6	Acetyl-CoA acetyltransferase, cytosolic	Acat3;Acat3;Acat2;Acat2	IDEFPRHGSNLEAMGKLKPYFLTDGTGTVTP;IDEFPRHGSNLEAMGKLKPYFLTDGTGTVTT	NaN		0.333862	-0.149711	-0.483572	#DIV/0!		2	___1		acetyl-CoA C-acetyltransferase activity;acetyl-CoA C-acyltransferase activity;acetyltransferase activity;C-acetyltransferase activity;C-acyltransferase activity;catalytic activity;transferase activity;transferase activity, transferring acyl groups;transferase activity, transferring acyl groups other than amino-acyl groups	cell part;cytoplasmic part;intracellular membrane-bounded organelle;intracellular organelle;intracellular part;membrane-bounded organelle;mitochondrion;organelle	Benzoate degradation;Butanoate metabolism;Carbon fixation pathways in prokaryotes;Fatty acid metabolism;Glyoxylate and dicarboxylate metabolism;Lysine degradation;Propanoate metabolism;Pyruvate metabolism;Synthesis and degradation of ketone bodies;Terpenoid backbone biosynthesis;Tryptophan metabolism;Two-component system;Valine, leucine and isoleucine degradation	1	0.000247645	92.65	92.65	2.0552	14170000
Q3V117;Q91V92	554;544	Q3V117;Q91V92	ATP-citrate synthase	Acly;Acly	QKFYWGHKEILIPVFKNMADAMKKHPEVDVL	NaN		0.694485	0.972861	0.278377	#DIV/0!		2	___1	acetyl-CoA biosynthetic process;acetyl-CoA metabolic process;biosynthetic process;carbohydrate metabolic process;cellular biosynthetic process;cellular carbohydrate metabolic process;cellular metabolic process;cellular process;coenzyme biosynthetic process;coenzyme metabolic process;cofactor biosynthetic process;cofactor metabolic process;lipid metabolic process;metabolic process;primary metaboli…	acid-thiol ligase activity;adenyl nucleotide binding;adenyl ribonucleotide binding;ATP binding;ATP citrate synthase activity;binding;catalytic activity;cation binding;CoA-ligase activity;cofactor binding;ion binding;ligase activity;ligase activity, forming carbon-sulfur bonds;metal ion binding;nucleotide binding;purine nucleotide binding;purine ribonucleoside triphosphate binding;purine ribonucle…	cell part;cytoplasmic part;intracellular membrane-bounded organelle;intracellular organelle;intracellular part;membrane;membrane-bounded organelle;mitochondrion;nucleus;organelle;plasma membrane	Carbon fixation pathways in prokaryotes;Citrate cycle (TCA cycle)	1	2.38e-13	111.64	111.64	0.71414	208540000
A2AKK5;A2AKK5-2;Q8BGG9;Q8BGG9-2	403;385;407;389	A2AKK5;Q8BGG9	Acyl-coenzyme A amino acid N-acyltransferase 1;Acyl-coenzyme A amino acid N-acyltransferase 2	Acnat1;Acnat2	MAHAAAQEHSWREIQKFFRKHLLQSGSKL__	NaN		0.444378	0.0499493	-0.394429	#DIV/0!		2	___1	acyl-CoA metabolic process;carboxylic acid metabolic process;cellular ketone metabolic process;cellular lipid metabolic process;cellular metabolic process;cellular process;coenzyme metabolic process;cofactor metabolic process;fatty acid metabolic process;lipid metabolic process;metabolic process;monocarboxylic acid metabolic process;organic acid metabolic process;oxoacid metabolic process;primary…	catalytic activity;hydrolase activity;hydrolase activity, acting on ester bonds;N-acyltransferase activity;thiolester hydrolase activity;transferase activity;transferase activity, transferring acyl groups;transferase activity, transferring acyl groups other than amino-acyl groups	cell part;cytoplasmic part;intracellular membrane-bounded organelle;intracellular organelle;intracellular part;membrane-bounded organelle;microbody;organelle;peroxisome		1	0.0604231	95.62	78.616	-0.42542	101310000
Q99KI0	730	Q99KI0	Aconitate hydratase, mitochondrial	Aco2	YNKIHPVDKLTIQGLKDFAPGKPLKCVIKHP	NaN		0.191201	0.152606	-0.0385955	#DIV/0!		2	___1	acetyl-CoA catabolic process;acetyl-CoA metabolic process;carboxylic acid metabolic process;catabolic process;cellular catabolic process;cellular ketone metabolic process;cellular metabolic process;cellular process;citrate metabolic process;coenzyme catabolic process;coenzyme metabolic process;cofactor catabolic process;cofactor metabolic process;isocitrate metabolic process;metabolic process;org…	3 iron, 4 sulfur cluster binding;4 iron, 4 sulfur cluster binding;aconitate hydratase activity;binding;carbon-oxygen lyase activity;catalytic activity;cation binding;citrate hydro-lyase (cis-aconitate-forming) activity;hydro-lyase activity;ion binding;iron ion binding;iron-sulfur cluster binding;isocitrate hydro-lyase (cis-aconitate-forming) activity;lyase activity;metal cluster binding;metal ion…	cell part;cytoplasmic part;intracellular membrane-bounded organelle;intracellular organelle;intracellular part;membrane-bounded organelle;mitochondrion;nucleus;organelle	Carbon fixation pathways in prokaryotes;Citrate cycle (TCA cycle);Glyoxylate and dicarboxylate metabolism	1	9.22e-10	103.21	84.566	0.60908	164430000
Q99KI0	577	Q99KI0	Aconitate hydratase, mitochondrial	Aco2	SQRLQLLEPFDKWDGKDLEDLQILIKVKGKC	NaN		0.191201	0.152606	-0.0385955	#DIV/0!		3	___1	acetyl-CoA catabolic process;acetyl-CoA metabolic process;carboxylic acid metabolic process;catabolic process;cellular catabolic process;cellular ketone metabolic process;cellular metabolic process;cellular process;citrate metabolic process;coenzyme catabolic process;coenzyme metabolic process;cofactor catabolic process;cofactor metabolic process;isocitrate metabolic process;metabolic process;org…	3 iron, 4 sulfur cluster binding;4 iron, 4 sulfur cluster binding;aconitate hydratase activity;binding;carbon-oxygen lyase activity;catalytic activity;cation binding;citrate hydro-lyase (cis-aconitate-forming) activity;hydro-lyase activity;ion binding;iron ion binding;iron-sulfur cluster binding;isocitrate hydro-lyase (cis-aconitate-forming) activity;lyase activity;metal cluster binding;metal ion…	cell part;cytoplasmic part;intracellular membrane-bounded organelle;intracellular organelle;intracellular part;membrane-bounded organelle;mitochondrion;nucleus;organelle	Carbon fixation pathways in prokaryotes;Citrate cycle (TCA cycle);Glyoxylate and dicarboxylate metabolism	0.99623	1.19e-40	138.22	124.86	0.026892	502340000
Q9CQR4	43	Q9CQR4	Acyl-coenzyme A thioesterase 13	Acot13	VTLVSAAPEKLICEMKVEEQHTNKLGTLHGG	NaN		0.659689	0.250068	-0.409621	#DIV/0!		3	___1	cellular component assembly;cellular component organization;cellular component organization or biogenesis;macromolecular complex assembly;macromolecular complex subunit organization;protein complex assembly;protein complex subunit organization;protein homooligomerization;protein homotetramerization;protein oligomerization;protein tetramerization	acyl-CoA hydrolase activity;catalytic activity;CoA hydrolase activity;hydrolase activity;hydrolase activity, acting on ester bonds;thiolester hydrolase activity	cell part;cytoplasmic part;intracellular membrane-bounded organelle;intracellular organelle;intracellular part;membrane-bounded organelle;mitochondrion;organelle		1	2.76e-07	113.25	113.25	-0.7947	15657000
Q9R0H0;Q9R0H0-2;A2A848	272;272;236	Q9R0H0;Q9R0H0-2	Peroxisomal acyl-coenzyme A oxidase 1;Acyl-coenzyme A oxidase	Acox1;Acox1	AQVKPDGTYVKPLSNKLTYGTMVFVRSFLVG	NaN		0.489207	0.0501633	-0.439044	#DIV/0!		2	___1	biological regulation;carboxylic acid catabolic process;carboxylic acid metabolic process;catabolic process;cellular catabolic process;cellular component organization;cellular component organization at cellular level;cellular component organization or biogenesis;cellular component organization or biogenesis at cellular level;cellular ketone metabolic process;cellular lipid catabolic process;cellu…	acyl-CoA dehydrogenase activity;acyl-CoA oxidase activity;binding;carboxylic acid binding;catalytic activity;coenzyme binding;cofactor binding;FAD binding;fatty acid binding;flavin adenine dinucleotide binding;lipid binding;monocarboxylic acid binding;oxidoreductase activity;oxidoreductase activity, acting on the CH-CH group of donors;oxidoreductase activity, acting on the CH-CH group of donors, …	cell part;cytoplasmic part;intracellular membrane-bounded organelle;intracellular organelle;intracellular organelle part;intracellular part;membrane;membrane-bounded organelle;microbody;microbody membrane;microbody part;mitochondrion;organelle;organelle membrane;organelle part;peroxisomal membrane;peroxisomal part	alpha-Linolenic acid metabolism;Biosynthesis of unsaturated fatty acids;Fatty acid metabolism;Peroxisome;PPAR signaling pathway	1	3.62e-18	143.38	85.734	-0.3281	84891000
Q9QXD1;E9Q5T5	66;66	Q9QXD1	Peroxisomal acyl-coenzyme A oxidase 2	Acox2;Acox2	RRVESLIQRDPVFNLKHLYFMTRDELYEDAV	NaN		0.273397	-0.827988	-1.10139	#DIV/0!		3	___1	carboxylic acid catabolic process;carboxylic acid metabolic process;catabolic process;cellular catabolic process;cellular ketone metabolic process;cellular lipid catabolic process;cellular lipid metabolic process;cellular metabolic process;cellular process;fatty acid beta-oxidation;fatty acid catabolic process;fatty acid metabolic process;fatty acid oxidation;lipid catabolic process;lipid metabol…	3alpha,7alpha,12alpha-trihydroxy-5beta-cholestanoyl-CoA 24-hydroxylase activity;acyl-CoA dehydrogenase activity;acyl-CoA oxidase activity;binding;catalytic activity;coenzyme binding;cofactor binding;flavin adenine dinucleotide binding;oxidoreductase activity;oxidoreductase activity, acting on CH or CH2 groups;oxidoreductase activity, acting on the CH-CH group of donors;oxidoreductase activity, ac…	cell part;cytoplasmic part;intracellular membrane-bounded organelle;intracellular organelle;intracellular part;membrane-bounded organelle;microbody;organelle;peroxisome	Peroxisome;PPAR signaling pathway;Primary bile acid biosynthesis	1	8.64e-10	118.33	118.33	2.0336	21359000
D3Z041;P41216	641;641	D3Z041	Long-chain-fatty-acid--CoA ligase 1	Acsl1;Acsl1	CRNKDINKAILDDLLKLGKEAGLKPFEQVKG	NaN		-0.73109	-0.0849854	0.646105	#DIV/0!		2	___1	acylglycerol metabolic process;adiponectin-mediated signaling pathway;biological regulation;biosynthetic process;catabolic process;cell surface receptor linked signaling pathway;cellular catabolic process;cellular lipid metabolic process;cellular metabolic process;cellular process;cellular response to chemical stimulus;cellular response to cytokine stimulus;cellular response to organic substance;…	adenyl nucleotide binding;adenyl ribonucleotide binding;ATP binding;binding;catalytic activity;fatty acid ligase activity;ligase activity;ligase activity, forming carbon-sulfur bonds;long-chain fatty acid-CoA ligase activity;nucleotide binding;purine nucleotide binding;purine ribonucleoside triphosphate binding;purine ribonucleotide binding;ribonucleotide binding	cell part;cytoplasmic part;endoplasmic reticulum membrane;endoplasmic reticulum part;integral to membrane;intracellular membrane-bounded organelle;intracellular organelle;intracellular organelle part;intracellular part;intrinsic to membrane;membrane;membrane part;membrane-bounded organelle;microbody;microbody membrane;microbody part;mitochondrial membrane;mitochondrial outer membrane;mitochondria…	Adipocytokine signaling pathway;Fatty acid metabolism;Peroxisome;PPAR signaling pathway	1	0.000698737	85.924	85.924	-0.28309	166230000
D3Z041;P41216	649;649	D3Z041	Long-chain-fatty-acid--CoA ligase 1	Acsl1;Acsl1	AILDDLLKLGKEAGLKPFEQVKGIAVHPELF	NaN		-0.73109	-0.0849854	0.646105	#DIV/0!		2	___1	acylglycerol metabolic process;adiponectin-mediated signaling pathway;biological regulation;biosynthetic process;catabolic process;cell surface receptor linked signaling pathway;cellular catabolic process;cellular lipid metabolic process;cellular metabolic process;cellular process;cellular response to chemical stimulus;cellular response to cytokine stimulus;cellular response to organic substance;…	adenyl nucleotide binding;adenyl ribonucleotide binding;ATP binding;binding;catalytic activity;fatty acid ligase activity;ligase activity;ligase activity, forming carbon-sulfur bonds;long-chain fatty acid-CoA ligase activity;nucleotide binding;purine nucleotide binding;purine ribonucleoside triphosphate binding;purine ribonucleotide binding;ribonucleotide binding	cell part;cytoplasmic part;endoplasmic reticulum membrane;endoplasmic reticulum part;integral to membrane;intracellular membrane-bounded organelle;intracellular organelle;intracellular organelle part;intracellular part;intrinsic to membrane;membrane;membrane part;membrane-bounded organelle;microbody;microbody membrane;microbody part;mitochondrial membrane;mitochondrial outer membrane;mitochondria…	Adipocytokine signaling pathway;Fatty acid metabolism;Peroxisome;PPAR signaling pathway	1	0.000725275	84.188	84.188	-0.65577	28016000
D3Z041;P41216	533;533	D3Z041	Long-chain-fatty-acid--CoA ligase 1	Acsl1;Acsl1	KGYLKDPARTAEALDKDGWLHTGDIGKWLPN	NaN		-0.73109	-0.0849854	0.646105	#DIV/0!		3	___1	acylglycerol metabolic process;adiponectin-mediated signaling pathway;biological regulation;biosynthetic process;catabolic process;cell surface receptor linked signaling pathway;cellular catabolic process;cellular lipid metabolic process;cellular metabolic process;cellular process;cellular response to chemical stimulus;cellular response to cytokine stimulus;cellular response to organic substance;…	adenyl nucleotide binding;adenyl ribonucleotide binding;ATP binding;binding;catalytic activity;fatty acid ligase activity;ligase activity;ligase activity, forming carbon-sulfur bonds;long-chain fatty acid-CoA ligase activity;nucleotide binding;purine nucleotide binding;purine ribonucleoside triphosphate binding;purine ribonucleotide binding;ribonucleotide binding	cell part;cytoplasmic part;endoplasmic reticulum membrane;endoplasmic reticulum part;integral to membrane;intracellular membrane-bounded organelle;intracellular organelle;intracellular organelle part;intracellular part;intrinsic to membrane;membrane;membrane part;membrane-bounded organelle;microbody;microbody membrane;microbody part;mitochondrial membrane;mitochondrial outer membrane;mitochondria…	Adipocytokine signaling pathway;Fatty acid metabolism;Peroxisome;PPAR signaling pathway	1	3.36e-29	154.39	154.39	0.83494	25459000
Q91VA0;Q91VA0-2;D3Z106	527;500;500	Q91VA0	Acyl-coenzyme A synthetase ACSM1, mitochondrial	Acsm1;Acsm1	VLNPEFLSHDQEQLIKELQHHVKSVTAPYKY	NaN		-0.609861	0.0597402	0.669601	#DIV/0!		5	___1	biosynthetic process;carboxylic acid biosynthetic process;carboxylic acid metabolic process;cellular biosynthetic process;cellular ketone metabolic process;cellular lipid metabolic process;cellular metabolic process;cellular process;fatty acid biosynthetic process;fatty acid metabolic process;lipid biosynthetic process;lipid metabolic process;metabolic process;monocarboxylic acid metabolic proces…	acid-thiol ligase activity;acyl-CoA ligase activity;adenyl nucleotide binding;adenyl ribonucleotide binding;ATP binding;binding;butyrate-CoA ligase activity;catalytic activity;cation binding;CoA-ligase activity;fatty acid ligase activity;GTP binding;guanyl nucleotide binding;guanyl ribonucleotide binding;ion binding;ligase activity;ligase activity, forming carbon-sulfur bonds;metal ion binding;nu…	cell part;cytoplasmic part;intracellular membrane-bounded organelle;intracellular organelle;intracellular organelle lumen;intracellular organelle part;intracellular part;membrane-bounded organelle;membrane-enclosed lumen;mitochondrial matrix;mitochondrial part;mitochondrion;organelle;organelle lumen;organelle part	Butanoate metabolism	1	1.95e-66	159.46	159.46	0.63902	291110000
Q91VA0;Q91VA0-2;D3Z106	534;507;507	Q91VA0	Acyl-coenzyme A synthetase ACSM1, mitochondrial	Acsm1;Acsm1	SHDQEQLIKELQHHVKSVTAPYKYPRKVEFV	NaN		-0.609861	0.0597402	0.669601	#DIV/0!		3	___1	biosynthetic process;carboxylic acid biosynthetic process;carboxylic acid metabolic process;cellular biosynthetic process;cellular ketone metabolic process;cellular lipid metabolic process;cellular metabolic process;cellular process;fatty acid biosynthetic process;fatty acid metabolic process;lipid biosynthetic process;lipid metabolic process;metabolic process;monocarboxylic acid metabolic proces…	acid-thiol ligase activity;acyl-CoA ligase activity;adenyl nucleotide binding;adenyl ribonucleotide binding;ATP binding;binding;butyrate-CoA ligase activity;catalytic activity;cation binding;CoA-ligase activity;fatty acid ligase activity;GTP binding;guanyl nucleotide binding;guanyl ribonucleotide binding;ion binding;ligase activity;ligase activity, forming carbon-sulfur bonds;metal ion binding;nu…	cell part;cytoplasmic part;intracellular membrane-bounded organelle;intracellular organelle;intracellular organelle lumen;intracellular organelle part;intracellular part;membrane-bounded organelle;membrane-enclosed lumen;mitochondrial matrix;mitochondrial part;mitochondrion;organelle;organelle lumen;organelle part	Butanoate metabolism	1	5.39e-10	118.52	103.16	1.0014	154630000
Q91VA0;Q91VA0-2;D3Z106	352;352;352	Q91VA0	Acyl-coenzyme A synthetase ACSM1, mitochondrial	Acsm1;Acsm1	TTGGESLLPEEYEQWKQRTGLSIHEVYGQSE	NaN		-0.609861	0.0597402	0.669601	#DIV/0!		3	___1	biosynthetic process;carboxylic acid biosynthetic process;carboxylic acid metabolic process;cellular biosynthetic process;cellular ketone metabolic process;cellular lipid metabolic process;cellular metabolic process;cellular process;fatty acid biosynthetic process;fatty acid metabolic process;lipid biosynthetic process;lipid metabolic process;metabolic process;monocarboxylic acid metabolic proces…	acid-thiol ligase activity;acyl-CoA ligase activity;adenyl nucleotide binding;adenyl ribonucleotide binding;ATP binding;binding;butyrate-CoA ligase activity;catalytic activity;cation binding;CoA-ligase activity;fatty acid ligase activity;GTP binding;guanyl nucleotide binding;guanyl ribonucleotide binding;ion binding;ligase activity;ligase activity, forming carbon-sulfur bonds;metal ion binding;nu…	cell part;cytoplasmic part;intracellular membrane-bounded organelle;intracellular organelle;intracellular organelle lumen;intracellular organelle part;intracellular part;membrane-bounded organelle;membrane-enclosed lumen;mitochondrial matrix;mitochondrial part;mitochondrion;organelle;organelle lumen;organelle part	Butanoate metabolism	1	2.47e-09	88.222	88.222	-0.020719	38487000
Q91VA0;Q91VA0-2;D3Z106;D3YV36	81;81;81;81	Q91VA0	Acyl-coenzyme A synthetase ACSM1, mitochondrial	Acsm1;Acsm1;Acsm1	PSPAFWWVNGQGDEIKWSFRKLRDLTCRTAN	NaN		-0.609861	0.0597402	0.669601	#DIV/0!		3	___1	biosynthetic process;carboxylic acid biosynthetic process;carboxylic acid metabolic process;cellular biosynthetic process;cellular ketone metabolic process;cellular lipid metabolic process;cellular metabolic process;cellular process;fatty acid biosynthetic process;fatty acid metabolic process;lipid biosynthetic process;lipid metabolic process;metabolic process;monocarboxylic acid metabolic proces…	acid-thiol ligase activity;acyl-CoA ligase activity;adenyl nucleotide binding;adenyl ribonucleotide binding;ATP binding;binding;butyrate-CoA ligase activity;catalytic activity;cation binding;CoA-ligase activity;fatty acid ligase activity;GTP binding;guanyl nucleotide binding;guanyl ribonucleotide binding;ion binding;ligase activity;ligase activity, forming carbon-sulfur bonds;metal ion binding;nu…	cell part;cytoplasmic part;intracellular membrane-bounded organelle;intracellular organelle;intracellular organelle lumen;intracellular organelle part;intracellular part;membrane-bounded organelle;membrane-enclosed lumen;mitochondrial matrix;mitochondrial part;mitochondrion;organelle;organelle lumen;organelle part	Butanoate metabolism	1	7.83e-06	76.733	76.733	0.48524	10748000
Q8BGA8	335	Q8BGA8	Acyl-coenzyme A synthetase ACSM5, mitochondrial	Acsm5	PTLFRLLVQEDLTRYKFQCLRHCLTGGEALN	NaN		0.203431	-0.953867	-1.1573	#DIV/0!		2	___1	carboxylic acid metabolic process;cellular ketone metabolic process;cellular lipid metabolic process;cellular metabolic process;cellular process;fatty acid metabolic process;lipid metabolic process;metabolic process;monocarboxylic acid metabolic process;organic acid metabolic process;oxoacid metabolic process;primary metabolic process;small molecule metabolic process	acid-thiol ligase activity;adenyl nucleotide binding;adenyl ribonucleotide binding;ATP binding;binding;butyrate-CoA ligase activity;catalytic activity;cation binding;ion binding;ligase activity;ligase activity, forming carbon-sulfur bonds;metal ion binding;nucleotide binding;purine nucleotide binding;purine ribonucleoside triphosphate binding;purine ribonucleotide binding;ribonucleotide binding	cell part;cytoplasmic part;intracellular organelle lumen;intracellular organelle part;intracellular part;membrane-enclosed lumen;mitochondrial matrix;mitochondrial part;organelle lumen;organelle part	Butanoate metabolism	1	0.0869391	80.462	80.462	-0.31024	28449000
P61161	299	P61161	Actin-related protein 2	Actr2	NTIQAADIDTRSEFYKHIVLSGGSTMYPGLP	NaN		-0.113402	0.176667	0.290069	#DIV/0!		3	___1	actin cytoskeleton organization;actin filament organization;actin filament-based process;actin nucleation;Arp2/3 complex-mediated actin nucleation;asymmetric cell division;biological regulation;cell cycle;cell cycle cytokinesis;cell cycle process;cell division;cellular component organization;cellular component organization at cellular level;cellular component organization or biogenesis;cellular c…	adenyl nucleotide binding;adenyl ribonucleotide binding;ATP binding;binding;nucleotide binding;purine nucleotide binding;purine ribonucleoside triphosphate binding;purine ribonucleotide binding;ribonucleotide binding	actin cap;Arp2/3 protein complex;cell cortex part;cell part;cell projection;cytoplasmic part;cytoskeletal part;intracellular organelle part;intracellular part;macromolecular complex;organelle part;protein complex		1	4.37e-78	171.29	171.29	0.39274	144730000
Q99JW2	288	Q99JW2	Aminoacylase-1	Acy1	FDFRVAPDVDMKAFEKQLQRWCQEAGEGVTF	NaN		0.105397	0.0652157	-0.0401811	#DIV/0!		2	___1	amine metabolic process;carboxylic acid metabolic process;cellular amine metabolic process;cellular amino acid metabolic process;cellular ketone metabolic process;cellular metabolic process;cellular nitrogen compound metabolic process;cellular process;macromolecule metabolic process;metabolic process;nitrogen compound metabolic process;organic acid metabolic process;oxoacid metabolic process;prim…	aminoacylase activity;binding;catalytic activity;cation binding;hydrolase activity;hydrolase activity, acting on carbon-nitrogen (but not peptide) bonds;hydrolase activity, acting on carbon-nitrogen (but not peptide) bonds, in linear amides;ion binding;metal ion binding;metallopeptidase activity;peptidase activity;peptidase activity, acting on L-amino acid peptides	cell part;cytoplasm;intracellular part	Arginine and proline metabolism	1	0.00692396	86.794	86.794	2.5072	2626800
P00329	339	P00329	Alcohol dehydrogenase 1	Adh1	KSKDSVPKLVADFMAKKFPLDPLITHVLPFE	NaN		0.0378862	0.746206	0.70832	#DIV/0!		2	___1	adult behavior;alcohol catabolic process;alcohol metabolic process;behavior;behavioral response to ethanol;biological regulation;carboxylic acid metabolic process;catabolic process;cellular hormone metabolic process;cellular ketone metabolic process;cellular lipid metabolic process;cellular metabolic process;cellular process;diterpenoid metabolic process;ethanol catabolic process;ethanol metaboli…	alcohol dehydrogenase (NAD) activity;binding;catalytic activity;cation binding;ion binding;metal ion binding;oxidoreductase activity;oxidoreductase activity, acting on CH-OH group of donors;oxidoreductase activity, acting on the CH-OH group of donors, NAD or NADP as acceptor;transition metal ion binding;zinc ion binding	cell part;cytoplasmic part;intracellular membrane-bounded organelle;intracellular organelle;intracellular part;membrane-bounded organelle;mitochondrion;organelle	Drug metabolism - cytochrome P450;Fatty acid metabolism;Glycolysis / Gluconeogenesis;Metabolism of xenobiotics by cytochrome P450;Retinol metabolism;Tyrosine metabolism	1	0.0364544	80.688	80.688	-1.5018	35502000
P28474;Q64437	226;226	P28474;Q64437	Alcohol dehydrogenase class-3;Alcohol dehydrogenase class 4 mu/sigma chain	Adh5;Adh7	CKAAGASRIIGIDINKDKFQKALAVGATECI;CKVAGASRIIGIDINKDKFAKAKEFGASECI	NaN		0.0580991	-0.0722747	-0.130374	#DIV/0!		2	___1	aging;alcohol catabolic process;alcohol metabolic process;aldehyde catabolic process;biological regulation;carboxylic acid metabolic process;catabolic process;cellular aldehyde metabolic process;cellular catabolic process;cellular hormone metabolic process;cellular ketone metabolic process;cellular lipid metabolic process;cellular macromolecule metabolic process;cellular metabolic process;cellula…	alcohol dehydrogenase (NAD) activity;alcohol dehydrogenase activity, zinc-dependent;aldehyde oxidase activity;binding;carboxylic acid binding;catalytic activity;cation binding;fatty acid binding;formaldehyde dehydrogenase activity;ion binding;lipid binding;metal ion binding;monocarboxylic acid binding;oxidoreductase activity;oxidoreductase activity, acting on CH-OH group of donors;oxidoreductase …	cell part;cytoplasm;cytoplasmic part;extracellular region;intracellular;intracellular membrane-bounded organelle;intracellular non-membrane-bounded organelle;intracellular organelle;intracellular organelle part;intracellular part;membrane-bounded organelle;mitochondrion;non-membrane-bounded organelle;nuclear part;nucleolus;nucleus;organelle;organelle part	Chloroalkane and chloroalkene degradation;Drug metabolism - cytochrome P450;Fatty acid metabolism;Glycolysis / Gluconeogenesis;Metabolism of xenobiotics by cytochrome P450;Methane metabolism;Naphthalene degradation;Retinol metabolism;Tyrosine metabolism	1	0.000326113	100.88	100.88	0.18081	54219000
P55264;P55264-2	164;148	P55264;P55264-2	Adenosine kinase	Adk	SLVANLAAANCYKKEKHLDLERNWVLVEKAR	NaN		0.442979	0.00217903	-0.4408	#DIV/0!		3	___1	2'-deoxyribonucleotide biosynthetic process;2'-deoxyribonucleotide metabolic process;adenosine metabolic process;AMP biosynthetic process;AMP metabolic process;AMP salvage;biological regulation;biosynthetic process;cell proliferation;cellular biosynthetic process;cellular metabolic compound salvage;cellular metabolic process;cellular nitrogen compound biosynthetic process;cellular nitrogen compou…	adenosine kinase activity;adenyl nucleotide binding;adenyl ribonucleotide binding;ATP binding;binding;catalytic activity;cation binding;ion binding;kinase activity;metal ion binding;nucleobase-containing compound kinase activity;nucleoside kinase activity;nucleotide binding;phosphotransferase activity, alcohol group as acceptor;purine nucleotide binding;purine ribonucleoside triphosphate binding;…	cell part;cytoplasmic part;cytosol;intracellular membrane-bounded organelle;intracellular organelle;intracellular part;membrane-bounded organelle;nucleus;organelle	Purine metabolism	1	0.00873297	83.456	83.456	0.61528	5733400
P55264;P55264-2	70;54	P55264;P55264-2	Adenosine kinase	Adk	ILAEDKHKELFDELVKKFKVEYHAGGSTQNS	NaN		0.442979	0.00217903	-0.4408	#DIV/0!		3	___1	2'-deoxyribonucleotide biosynthetic process;2'-deoxyribonucleotide metabolic process;adenosine metabolic process;AMP biosynthetic process;AMP metabolic process;AMP salvage;biological regulation;biosynthetic process;cell proliferation;cellular biosynthetic process;cellular metabolic compound salvage;cellular metabolic process;cellular nitrogen compound biosynthetic process;cellular nitrogen compou…	adenosine kinase activity;adenyl nucleotide binding;adenyl ribonucleotide binding;ATP binding;binding;catalytic activity;cation binding;ion binding;kinase activity;metal ion binding;nucleobase-containing compound kinase activity;nucleoside kinase activity;nucleotide binding;phosphotransferase activity, alcohol group as acceptor;purine nucleotide binding;purine ribonucleoside triphosphate binding;…	cell part;cytoplasmic part;cytosol;intracellular membrane-bounded organelle;intracellular organelle;intracellular part;membrane-bounded organelle;nucleus;organelle	Purine metabolism	1	0.000626736	103.55	88.338	0.30304	29959000
P55264;P55264-2	255;239	P55264;P55264-2	Adenosine kinase	Adk	ETEAATFAREQGFETKDIKEIAKKAQALPKV	NaN		0.442979	0.00217903	-0.4408	#DIV/0!		2	___1	2'-deoxyribonucleotide biosynthetic process;2'-deoxyribonucleotide metabolic process;adenosine metabolic process;AMP biosynthetic process;AMP metabolic process;AMP salvage;biological regulation;biosynthetic process;cell proliferation;cellular biosynthetic process;cellular metabolic compound salvage;cellular metabolic process;cellular nitrogen compound biosynthetic process;cellular nitrogen compou…	adenosine kinase activity;adenyl nucleotide binding;adenyl ribonucleotide binding;ATP binding;binding;catalytic activity;cation binding;ion binding;kinase activity;metal ion binding;nucleobase-containing compound kinase activity;nucleoside kinase activity;nucleotide binding;phosphotransferase activity, alcohol group as acceptor;purine nucleotide binding;purine ribonucleoside triphosphate binding;…	cell part;cytoplasmic part;cytosol;intracellular membrane-bounded organelle;intracellular organelle;intracellular part;membrane-bounded organelle;nucleus;organelle	Purine metabolism	1	0.00078045	76.655	76.655	-1.0139	327620000
Q8JZQ2;Q3UDQ7	299;299	Q8JZQ2	AFG3-like protein 2	Afg3l2;Afg3l2	MGGLFSVGETTAKVLKDEIDVKFKDVAGCEE	NaN		0.0445501	-0.103007	-0.147557	#DIV/0!		2	___1	anatomical structure development;anatomical structure morphogenesis;axon ensheathment;axonogenesis;biological regulation;catabolic process;cell part morphogenesis;cell projection morphogenesis;cell projection organization;cellular component morphogenesis;cellular component organization;cellular component organization at cellular level;cellular component organization or biogenesis;cellular compone…	adenyl nucleotide binding;adenyl ribonucleotide binding;ATP binding;binding;catalytic activity;cation binding;endopeptidase activity;hydrolase activity;hydrolase activity, acting on acid anhydrides;hydrolase activity, acting on acid anhydrides, in phosphorus-containing anhydrides;ion binding;metal ion binding;metalloendopeptidase activity;metallopeptidase activity;nucleoside-triphosphatase activi…	cell part;cytoplasmic part;integral to membrane;intracellular organelle part;intracellular part;intrinsic to membrane;membrane;membrane part;mitochondrial inner membrane;mitochondrial membrane;mitochondrial part;organelle inner membrane;organelle membrane;organelle part		1	0.00228815	85.807	85.807	0.68368	6407500
F8VPN4	334	F8VPN4		Agl	QENRRVTKSEPKEHLKIIQDPEYRRRGCAVD	NaN		-0.0484813	0.0910085	0.13949	#DIV/0!		2	___1	biosynthetic process;carbohydrate biosynthetic process;carbohydrate catabolic process;carbohydrate metabolic process;catabolic process;cellular biosynthetic process;cellular carbohydrate biosynthetic process;cellular carbohydrate catabolic process;cellular carbohydrate metabolic process;cellular glucan metabolic process;cellular macromolecule biosynthetic process;cellular macromolecule metabolic …	4-alpha-glucanotransferase activity;alpha-glucosidase activity;amylo-alpha-1,6-glucosidase activity;binding;carbohydrate binding;catalytic activity;glucosidase activity;glycogen debranching enzyme activity;hydrolase activity;hydrolase activity, acting on glycosyl bonds;hydrolase activity, hydrolyzing O-glycosyl compounds;pattern binding;polysaccharide binding;polyubiquitin binding;protein binding…	cell part;cytoplasm;cytoplasmic part;endoplasmic reticulum;inclusion body;intracellular membrane-bounded organelle;intracellular organelle;intracellular part;membrane-bounded organelle;nucleus;organelle;sarcoplasmic reticulum	Starch and sucrose metabolism	1	0.000237531	106.32	106.32	-1.069	11185000
F8VPN4;F6XXE6	1406;742	F8VPN4		Agl;Agl	LFTAEKAWKALEIAEKKLLGPLGMKTLDPDD	NaN		-0.0484813	0.0910085	0.13949	#DIV/0!		2	___1	biosynthetic process;carbohydrate biosynthetic process;carbohydrate catabolic process;carbohydrate metabolic process;catabolic process;cellular biosynthetic process;cellular carbohydrate biosynthetic process;cellular carbohydrate catabolic process;cellular carbohydrate metabolic process;cellular glucan metabolic process;cellular macromolecule biosynthetic process;cellular macromolecule metabolic …	4-alpha-glucanotransferase activity;alpha-glucosidase activity;amylo-alpha-1,6-glucosidase activity;binding;carbohydrate binding;catalytic activity;glucosidase activity;glycogen debranching enzyme activity;hydrolase activity;hydrolase activity, acting on glycosyl bonds;hydrolase activity, hydrolyzing O-glycosyl compounds;pattern binding;polysaccharide binding;polyubiquitin binding;protein binding…	cell part;cytoplasm;cytoplasmic part;endoplasmic reticulum;inclusion body;intracellular membrane-bounded organelle;intracellular organelle;intracellular part;membrane-bounded organelle;nucleus;organelle;sarcoplasmic reticulum	Starch and sucrose metabolism	1	0.00532052	83.005	81.594	1.1633	13268000
F8VPN4;E0CYU6	203;203	F8VPN4		Agl;Agl	PSKRYTWSDVGQLVEKLKREWNILCITDVVY	NaN		-0.0484813	0.0910085	0.13949	#DIV/0!		3	___1	biosynthetic process;carbohydrate biosynthetic process;carbohydrate catabolic process;carbohydrate metabolic process;catabolic process;cellular biosynthetic process;cellular carbohydrate biosynthetic process;cellular carbohydrate catabolic process;cellular carbohydrate metabolic process;cellular glucan metabolic process;cellular macromolecule biosynthetic process;cellular macromolecule metabolic …	4-alpha-glucanotransferase activity;alpha-glucosidase activity;amylo-alpha-1,6-glucosidase activity;binding;carbohydrate binding;catalytic activity;glucosidase activity;glycogen debranching enzyme activity;hydrolase activity;hydrolase activity, acting on glycosyl bonds;hydrolase activity, hydrolyzing O-glycosyl compounds;pattern binding;polysaccharide binding;polyubiquitin binding;protein binding…	cell part;cytoplasm;cytoplasmic part;endoplasmic reticulum;inclusion body;intracellular membrane-bounded organelle;intracellular organelle;intracellular part;membrane-bounded organelle;nucleus;organelle;sarcoplasmic reticulum	Starch and sucrose metabolism	1	1.35e-17	135.47	135.47	-0.44166	16814000
A2AS89	223	A2AS89	Agmatinase, mitochondrial	Agmat	RTPFRRSVDEGLLDSKRVVQIGIRGSSRTLD	NaN		0.467695	-0.0966134	-0.564308	#DIV/0!		2	___1	amine biosynthetic process;amine metabolic process;biosynthetic process;cellular amine metabolic process;cellular biogenic amine biosynthetic process;cellular biogenic amine metabolic process;cellular biosynthetic process;cellular metabolic process;cellular nitrogen compound biosynthetic process;cellular nitrogen compound metabolic process;cellular process;metabolic process;nitrogen compound meta…	agmatinase activity;binding;catalytic activity;cation binding;hydrolase activity;hydrolase activity, acting on carbon-nitrogen (but not peptide) bonds;hydrolase activity, acting on carbon-nitrogen (but not peptide) bonds, in linear amidines;ion binding;metal ion binding	cell part;cytoplasmic part;intracellular membrane-bounded organelle;intracellular organelle;intracellular part;membrane-bounded organelle;mitochondrion;organelle	Arginine and proline metabolism	1	0.000799826	99.5	95.401	-0.16106	311780000
P50247	412	P50247	Adenosylhomocysteinase	Ahcy	AHLGKLNVKLTKLTEKQAQYLGMPINGPFKP	NaN		0.351229	-0.348098	-0.699327	#DIV/0!		4	___1	cellular metabolic process;cellular process;metabolic process;one-carbon metabolic process;small molecule metabolic process	adenosylhomocysteinase activity;catalytic activity;hydrolase activity;hydrolase activity, acting on ether bonds;trialkylsulfonium hydrolase activity	cell part;cytoplasmic membrane-bounded vesicle;cytoplasmic part;cytoplasmic vesicle;intracellular membrane-bounded organelle;intracellular organelle;intracellular part;melanosome;membrane-bounded organelle;membrane-bounded vesicle;organelle;pigment granule;vesicle	Cysteine and methionine metabolism	1	1.14e-08	93.006	93.006	-0.58276	28394000
P50247	318	P50247	Adenosylhomocysteinase	Ahcy	DVEIDVKWLNENAVEKVNIKPQVDRYWLKNG	NaN		0.351229	-0.348098	-0.699327	#DIV/0!		3	___1	cellular metabolic process;cellular process;metabolic process;one-carbon metabolic process;small molecule metabolic process	adenosylhomocysteinase activity;catalytic activity;hydrolase activity;hydrolase activity, acting on ether bonds;trialkylsulfonium hydrolase activity	cell part;cytoplasmic membrane-bounded vesicle;cytoplasmic part;cytoplasmic vesicle;intracellular membrane-bounded organelle;intracellular organelle;intracellular part;melanosome;membrane-bounded organelle;membrane-bounded vesicle;organelle;pigment granule;vesicle	Cysteine and methionine metabolism	0.999069	1.99e-08	96.487	91.475	-0.28295	15379000
Q9WTP6;Q9WTP6-2	117;117	Q9WTP6	Adenylate kinase 2, mitochondrial	Ak2	PRTVRQAEMLDDLMEKRKEKLDSVIEFSIQD	NaN		#VALUE!	0.163827	NaN	#DIV/0!		2	___1	2'-deoxyribonucleotide metabolic process;ADP biosynthetic process;ADP metabolic process;AMP metabolic process;anatomical structure development;ATP metabolic process;biosynthetic process;brain development;cellular biosynthetic process;cellular metabolic process;cellular nitrogen compound biosynthetic process;cellular nitrogen compound metabolic process;cellular process;dATP metabolic process;deoxy…	adenyl nucleotide binding;adenyl ribonucleotide binding;adenylate kinase activity;ATP binding;binding;catalytic activity;kinase activity;nucleobase-containing compound kinase activity;nucleotide binding;nucleotide kinase activity;phosphotransferase activity, phosphate group as acceptor;purine nucleotide binding;purine ribonucleoside triphosphate binding;purine ribonucleotide binding;ribonucleotid…	cell part;cytoplasmic part;cytosol;intracellular organelle part;intracellular part;membrane;membrane-enclosed lumen;mitochondrial inner membrane;mitochondrial intermembrane space;mitochondrial membrane;mitochondrial part;organelle envelope lumen;organelle inner membrane;organelle membrane;organelle part	Purine metabolism	1	5.29e-23	159.5	159.5	-1.9789	17083000
Q9WTP7	189	Q9WTP7	GTP:AMP phosphotransferase, mitochondrial	Ak3	KAYEAQTEPVLQYYQKKGVLETFSGTETNKI	NaN		0.28492	-0.0312322	-0.316152	#DIV/0!		2	___1	AMP metabolic process;cellular metabolic process;cellular nitrogen compound metabolic process;cellular process;GTP metabolic process;heterocycle metabolic process;ITP metabolic process;metabolic process;nitrogen compound metabolic process;nucleobase-containing compound metabolic process;nucleobase-containing small molecule metabolic process;nucleoside metabolic process;nucleoside monophosphate me…	adenyl nucleotide binding;adenyl ribonucleotide binding;adenylate kinase activity;ATP binding;binding;catalytic activity;GTP binding;guanyl nucleotide binding;guanyl ribonucleotide binding;kinase activity;nucleobase-containing compound kinase activity;nucleoside triphosphate adenylate kinase activity;nucleotide binding;nucleotide kinase activity;phosphotransferase activity, phosphate group as acc…	cell part;cytoplasmic part;intracellular organelle lumen;intracellular organelle part;intracellular part;membrane-enclosed lumen;mitochondrial matrix;mitochondrial part;organelle lumen;organelle part	Pyrimidine metabolism	1	6.54e-07	91.207	91.207	0.19113	135900000
Q9WTP7	203	Q9WTP7	GTP:AMP phosphotransferase, mitochondrial	Ak3	QKKGVLETFSGTETNKIWPHVYSFLQTKVPE	NaN		0.28492	-0.0312322	-0.316152	#DIV/0!		3	___1	AMP metabolic process;cellular metabolic process;cellular nitrogen compound metabolic process;cellular process;GTP metabolic process;heterocycle metabolic process;ITP metabolic process;metabolic process;nitrogen compound metabolic process;nucleobase-containing compound metabolic process;nucleobase-containing small molecule metabolic process;nucleoside metabolic process;nucleoside monophosphate me…	adenyl nucleotide binding;adenyl ribonucleotide binding;adenylate kinase activity;ATP binding;binding;catalytic activity;GTP binding;guanyl nucleotide binding;guanyl ribonucleotide binding;kinase activity;nucleobase-containing compound kinase activity;nucleoside triphosphate adenylate kinase activity;nucleotide binding;nucleotide kinase activity;phosphotransferase activity, phosphate group as acc…	cell part;cytoplasmic part;intracellular organelle lumen;intracellular organelle part;intracellular part;membrane-enclosed lumen;mitochondrial matrix;mitochondrial part;organelle lumen;organelle part	Pyrimidine metabolism	1	7.07e-99	183.15	183.15	1.1864	154010000
E9QQ10;Q70FJ1;Q70FJ1-3;Q70FJ1-2	1458;1476;1476;1458	E9QQ10;Q70FJ1	A-kinase anchor protein 9	Akap9;Akap9	LQTFEATDKNFKEEFKPLSKELGEYRKAVPL;LQTFEATDKUFKEEFKPLSKELGEYRKAVPL	NaN		0.0573771	-0.186427	-0.243804	#DIV/0!		2	___1			cell part;cytoplasmic part;cytoskeletal part;Golgi apparatus;intracellular membrane-bounded organelle;intracellular organelle;intracellular organelle part;intracellular part;membrane-bounded organelle;microtubule organizing center part;organelle;organelle part;pericentriolar material		1	0.00699097	86.67	86.67	0.66247	238050000
Q9JII6;B1AXW3	23;23	Q9JII6	Alcohol dehydrogenase [NADP(+)]	Akr1a1;Akr1a1	LHTGQKMPLIGLGTWKSEPGQVKAAIKHALS	NaN		0.425643	-0.198923	-0.624567	#DIV/0!		2	___1	alcohol metabolic process;aldehyde catabolic process;biosynthetic process;carbohydrate catabolic process;carbohydrate metabolic process;carboxylic acid biosynthetic process;carboxylic acid catabolic process;carboxylic acid metabolic process;catabolic process;cellular aldehyde metabolic process;cellular biosynthetic process;cellular carbohydrate metabolic process;cellular catabolic process;cellula…	alcohol dehydrogenase (NADP+) activity;alditol:NADP+ 1-oxidoreductase activity;aldo-keto reductase (NADP) activity;catalytic activity;L-glucuronate reductase activity;oxidoreductase activity;oxidoreductase activity, acting on CH-OH group of donors;oxidoreductase activity, acting on the CH-OH group of donors, NAD or NADP as acceptor	apical plasma membrane;cell part;cytoplasmic part;cytosol;intracellular part;membrane part;plasma membrane part	Caprolactam degradation;Glycerolipid metabolism;Glycolysis / Gluconeogenesis	1	9.82e-07	86.455	86.455	0.84064	69689000
Q9JII6;B1AXW3	141;141	Q9JII6	Alcohol dehydrogenase [NADP(+)]	Akr1a1;Akr1a1	PKNADGTVRYDSTHYKETWKALEVLVAKGLV	NaN		0.425643	-0.198923	-0.624567	#DIV/0!		2	___1	alcohol metabolic process;aldehyde catabolic process;biosynthetic process;carbohydrate catabolic process;carbohydrate metabolic process;carboxylic acid biosynthetic process;carboxylic acid catabolic process;carboxylic acid metabolic process;catabolic process;cellular aldehyde metabolic process;cellular biosynthetic process;cellular carbohydrate metabolic process;cellular catabolic process;cellula…	alcohol dehydrogenase (NADP+) activity;alditol:NADP+ 1-oxidoreductase activity;aldo-keto reductase (NADP) activity;catalytic activity;L-glucuronate reductase activity;oxidoreductase activity;oxidoreductase activity, acting on CH-OH group of donors;oxidoreductase activity, acting on the CH-OH group of donors, NAD or NADP as acceptor	apical plasma membrane;cell part;cytoplasmic part;cytosol;intracellular part;membrane part;plasma membrane part	Caprolactam degradation;Glycerolipid metabolism;Glycolysis / Gluconeogenesis	1	0.00516122	89.301	89.301	-0.24144	12273000
Q571M4;Q8VC28;Q9JLI0	275;273;273	Q571M4;Q9JLI0	Aldo-keto reductase family 1 member C13	Akr1c13;Akr1c13;Akr1c12	RYLFQRGIVPLAQSFKENEMRENLQVFEFQL;RYLIQRGIVPLAQSFKENEMRENLQVFGFQL	NaN		-0.0694037	-0.244349	-0.174945	#DIV/0!		2	___1	cellular metabolic process;cellular process;metabolic process;xenobiotic metabolic process	aldo-keto reductase (NADP) activity;catalytic activity;oxidoreductase activity;oxidoreductase activity, acting on CH-OH group of donors;oxidoreductase activity, acting on the CH-OH group of donors, NAD or NADP as acceptor			1	2e-05	107.69	107.69	0.2356	19033000
Q571M4;Q8VC28;Q9JLI0	70;68;68	Q571M4;Q9JLI0	Aldo-keto reductase family 1 member C13	Akr1c13;Akr1c13;Akr1c12	YAYQVEEEIGQAIQSKIKAGVVKREDLFITT	NaN		-0.0694037	-0.244349	-0.174945	#DIV/0!		4	___1	cellular metabolic process;cellular process;metabolic process;xenobiotic metabolic process	aldo-keto reductase (NADP) activity;catalytic activity;oxidoreductase activity;oxidoreductase activity, acting on CH-OH group of donors;oxidoreductase activity, acting on the CH-OH group of donors, NAD or NADP as acceptor			1	5.1e-256	281.16	102.94	-0.13348	892530000
Q571M4;Q8VC28;Q9JLI0	303;301;301	Q571M4;Q9JLI0	Aldo-keto reductase family 1 member C13	Akr1c13;Akr1c13;Akr1c12	FQLSPEDMKTLDGLNKNFRYLPAEFLADHPE;FQLSPEDMKTLDGLNKNFRYLPAEFLVDHPE	NaN		-0.0694037	-0.244349	-0.174945	#DIV/0!		2	___1	cellular metabolic process;cellular process;metabolic process;xenobiotic metabolic process	aldo-keto reductase (NADP) activity;catalytic activity;oxidoreductase activity;oxidoreductase activity, acting on CH-OH group of donors;oxidoreductase activity, acting on the CH-OH group of donors, NAD or NADP as acceptor			1	0.02192	78.655	78.655	-0.62471	6402900
G3X9Y6	246	G3X9Y6		Akr1c19	SSPVLLNDPILCDMAKKHKRSPAQIALRYHL	NaN		0.385894	-0.53002	-0.915914	#DIV/0!		3	___1		catalytic activity;oxidoreductase activity			1	1.37e-15	108.5	108.5	-1.4824	10924000
P70694	278	P70694	Estradiol 17 beta-dehydrogenase 5	Akr1c6	RGVVVLAKSFSEKRIKENMQVFEFQLTSEDM	NaN		-0.264131	0.093303	0.357434	#DIV/0!		3	___1	biosynthetic process;lipid biosynthetic process;lipid metabolic process;metabolic process;primary metabolic process;steroid biosynthetic process;steroid metabolic process	aldo-keto reductase (NADP) activity;catalytic activity;estradiol 17-beta-dehydrogenase activity;oxidoreductase activity;oxidoreductase activity, acting on CH-OH group of donors;oxidoreductase activity, acting on the CH-OH group of donors, NAD or NADP as acceptor;steroid dehydrogenase activity;steroid dehydrogenase activity, acting on the CH-OH group of donors, NAD or NADP as acceptor		Bisphenol degradation;Butanoate metabolism;Chloroalkane and chloroalkene degradation;Fructose and mannose metabolism;Linoleic acid metabolism	1	3.71e-30	154.55	154.55	-1.0968	77549000
P24549	419	P24549	Retinal dehydrogenase 1	Aldh1a1	PVQQIMKFKSVDDVIKRANNTTYGLAAGLFT	NaN		0.47571	-1.05972	-1.53543	#DIV/0!		2	___1	9-cis-retinoic acid biosynthetic process;9-cis-retinoic acid metabolic process;anatomical structure development;anatomical structure morphogenesis;biological regulation;biosynthetic process;carboxylic acid metabolic process;cellular biosynthetic process;cellular component assembly;cellular component organization;cellular component organization or biogenesis;cellular hormone metabolic process;cell…	3-chloroallyl aldehyde dehydrogenase activity;benzaldehyde dehydrogenase (NAD+) activity;catalytic activity;oxidoreductase activity;oxidoreductase activity, acting on the aldehyde or oxo group of donors;oxidoreductase activity, acting on the aldehyde or oxo group of donors, NAD or NADP as acceptor;retinal dehydrogenase activity	cell part;cytoplasm;intracellular membrane-bounded organelle;intracellular organelle;intracellular part;membrane-bounded organelle;nucleus;organelle	Arginine and proline metabolism;Ascorbate and aldarate metabolism;beta-Alanine metabolism;Chloroalkane and chloroalkene degradation;Fatty acid metabolism;Glycerolipid metabolism;Glycolysis / Gluconeogenesis;Histidine metabolism;Limonene and pinene degradation;Lysine degradation;Pentose and glucuronate interconversions;Propanoate metabolism;Pyruvate metabolism;Tryptophan metabolism;Valine, leucine…	1	0.000377344	153.08	153.08	0.16543	74518000
P24549	252	P24549	Retinal dehydrogenase 1	Aldh1a1	MDVDKVAFTGSTQVGKLIKEAAGKSNLKRVT	NaN		0.47571	-1.05972	-1.53543	#DIV/0!		2	___1	9-cis-retinoic acid biosynthetic process;9-cis-retinoic acid metabolic process;anatomical structure development;anatomical structure morphogenesis;biological regulation;biosynthetic process;carboxylic acid metabolic process;cellular biosynthetic process;cellular component assembly;cellular component organization;cellular component organization or biogenesis;cellular hormone metabolic process;cell…	3-chloroallyl aldehyde dehydrogenase activity;benzaldehyde dehydrogenase (NAD+) activity;catalytic activity;oxidoreductase activity;oxidoreductase activity, acting on the aldehyde or oxo group of donors;oxidoreductase activity, acting on the aldehyde or oxo group of donors, NAD or NADP as acceptor;retinal dehydrogenase activity	cell part;cytoplasm;intracellular membrane-bounded organelle;intracellular organelle;intracellular part;membrane-bounded organelle;nucleus;organelle	Arginine and proline metabolism;Ascorbate and aldarate metabolism;beta-Alanine metabolism;Chloroalkane and chloroalkene degradation;Fatty acid metabolism;Glycerolipid metabolism;Glycolysis / Gluconeogenesis;Histidine metabolism;Limonene and pinene degradation;Lysine degradation;Pentose and glucuronate interconversions;Propanoate metabolism;Pyruvate metabolism;Tryptophan metabolism;Valine, leucine…	1	2.85e-11	132.06	124.51	-0.55642	59539000
O35945;P24549	62;62	O35945;P24549	Aldehyde dehydrogenase, cytosolic 1;Retinal dehydrogenase 1	Aldh1a7;Aldh1a1	EVICHVEEGDKADVDKAVKAARQAFQIGSPW	NaN		0.451295	-1.10695	-1.55825	#DIV/0!		2	___1	9-cis-retinoic acid biosynthetic process;9-cis-retinoic acid metabolic process;alcohol catabolic process;alcohol metabolic process;anatomical structure development;anatomical structure morphogenesis;biological regulation;biosynthetic process;carboxylic acid metabolic process;catabolic process;cellular biosynthetic process;cellular component assembly;cellular component organization;cellular compon…	3-chloroallyl aldehyde dehydrogenase activity;aldehyde dehydrogenase (NAD) activity;benzaldehyde dehydrogenase (NAD+) activity;catalytic activity;oxidoreductase activity;oxidoreductase activity, acting on the aldehyde or oxo group of donors;oxidoreductase activity, acting on the aldehyde or oxo group of donors, NAD or NADP as acceptor;retinal dehydrogenase activity	cell part;cytoplasm;intracellular membrane-bounded organelle;intracellular organelle;intracellular part;membrane-bounded organelle;nucleus;organelle	Arginine and proline metabolism;Ascorbate and aldarate metabolism;beta-Alanine metabolism;Chloroalkane and chloroalkene degradation;Fatty acid metabolism;Glycerolipid metabolism;Glycolysis / Gluconeogenesis;Histidine metabolism;Limonene and pinene degradation;Lysine degradation;Pentose and glucuronate interconversions;Propanoate metabolism;Pyruvate metabolism;Retinol metabolism;Tryptophan metabol…	1	0.00672382	87.308	75.378	0.035808	40210000
O35945;P24549	57;57	O35945;P24549	Aldehyde dehydrogenase, cytosolic 1;Retinal dehydrogenase 1	Aldh1a7;Aldh1a1	NPATEEVICHVEEGDKADVDKAVKAARQAFQ	NaN		0.451295	-1.10695	-1.55825	#DIV/0!		4	___1	9-cis-retinoic acid biosynthetic process;9-cis-retinoic acid metabolic process;alcohol catabolic process;alcohol metabolic process;anatomical structure development;anatomical structure morphogenesis;biological regulation;biosynthetic process;carboxylic acid metabolic process;catabolic process;cellular biosynthetic process;cellular component assembly;cellular component organization;cellular compon…	3-chloroallyl aldehyde dehydrogenase activity;aldehyde dehydrogenase (NAD) activity;benzaldehyde dehydrogenase (NAD+) activity;catalytic activity;oxidoreductase activity;oxidoreductase activity, acting on the aldehyde or oxo group of donors;oxidoreductase activity, acting on the aldehyde or oxo group of donors, NAD or NADP as acceptor;retinal dehydrogenase activity	cell part;cytoplasm;intracellular membrane-bounded organelle;intracellular organelle;intracellular part;membrane-bounded organelle;nucleus;organelle	Arginine and proline metabolism;Ascorbate and aldarate metabolism;beta-Alanine metabolism;Chloroalkane and chloroalkene degradation;Fatty acid metabolism;Glycerolipid metabolism;Glycolysis / Gluconeogenesis;Histidine metabolism;Limonene and pinene degradation;Lysine degradation;Pentose and glucuronate interconversions;Propanoate metabolism;Pyruvate metabolism;Retinol metabolism;Tryptophan metabol…	1	3.31e-27	117.08	117.08	-1.8219	51811000
Q9CZS1	416	Q9CZS1	Aldehyde dehydrogenase X, mitochondrial	Aldh1b1	KPTVFGDVQDGMRIAKEEIFGPVQPLFKFKK	NaN		1.00678	-0.276769	-1.28355	#DIV/0!		2	___1	alcohol catabolic process;alcohol metabolic process;catabolic process;ethanol catabolic process;ethanol metabolic process;metabolic process;primary alcohol catabolic process;primary alcohol metabolic process;small molecule catabolic process;small molecule metabolic process	aldehyde dehydrogenase (NAD) activity;catalytic activity;oxidoreductase activity;oxidoreductase activity, acting on the aldehyde or oxo group of donors;oxidoreductase activity, acting on the aldehyde or oxo group of donors, NAD or NADP as acceptor	cell part;cytoplasmic part;intracellular membrane-bounded organelle;intracellular organelle;intracellular organelle lumen;intracellular organelle part;intracellular part;membrane-bounded organelle;membrane-enclosed lumen;mitochondrial matrix;mitochondrial part;mitochondrion;nucleus;organelle;organelle lumen;organelle part	Arginine and proline metabolism;Ascorbate and aldarate metabolism;beta-Alanine metabolism;Chloroalkane and chloroalkene degradation;Fatty acid metabolism;Glycerolipid metabolism;Glycolysis / Gluconeogenesis;Histidine metabolism;Limonene and pinene degradation;Lysine degradation;Pentose and glucuronate interconversions;Propanoate metabolism;Pyruvate metabolism;Tryptophan metabolism;Valine, leucine…	1	0.00192621	87.647	87.647	-1.5978	13418000
Q9CZS1	366	Q9CZS1	Aldehyde dehydrogenase X, mitochondrial	Aldh1b1	GNPFELDTQQGPQVDKEQFERILGYIRLGQK	NaN		1.00678	-0.276769	-1.28355	#DIV/0!		3	___1	alcohol catabolic process;alcohol metabolic process;catabolic process;ethanol catabolic process;ethanol metabolic process;metabolic process;primary alcohol catabolic process;primary alcohol metabolic process;small molecule catabolic process;small molecule metabolic process	aldehyde dehydrogenase (NAD) activity;catalytic activity;oxidoreductase activity;oxidoreductase activity, acting on the aldehyde or oxo group of donors;oxidoreductase activity, acting on the aldehyde or oxo group of donors, NAD or NADP as acceptor	cell part;cytoplasmic part;intracellular membrane-bounded organelle;intracellular organelle;intracellular organelle lumen;intracellular organelle part;intracellular part;membrane-bounded organelle;membrane-enclosed lumen;mitochondrial matrix;mitochondrial part;mitochondrion;nucleus;organelle;organelle lumen;organelle part	Arginine and proline metabolism;Ascorbate and aldarate metabolism;beta-Alanine metabolism;Chloroalkane and chloroalkene degradation;Fatty acid metabolism;Glycerolipid metabolism;Glycolysis / Gluconeogenesis;Histidine metabolism;Limonene and pinene degradation;Lysine degradation;Pentose and glucuronate interconversions;Propanoate metabolism;Pyruvate metabolism;Tryptophan metabolism;Valine, leucine…	1	1.95e-63	161.59	142.04	-1.2328	208150000
Q8R0Y6	229	Q8R0Y6	Cytosolic 10-formyltetrahydrofolate dehydrogenase	Aldh1l1	DQPAEAIHNWIRGNDKVPGAWTEACGQKLTF	NaN		0.507416	-0.669917	-1.17733	#DIV/0!		2	___1	10-formyltetrahydrofolate catabolic process;10-formyltetrahydrofolate metabolic process;aromatic compound catabolic process;biosynthetic process;catabolic process;cellular aromatic compound metabolic process;cellular catabolic process;cellular metabolic process;cellular nitrogen compound catabolic process;cellular nitrogen compound metabolic process;cellular process;coenzyme catabolic process;coe…	catalytic activity;formyltetrahydrofolate dehydrogenase activity;hydroxymethyl-, formyl- and related transferase activity;methyltransferase activity;oxidoreductase activity;oxidoreductase activity, acting on the aldehyde or oxo group of donors;oxidoreductase activity, acting on the aldehyde or oxo group of donors, NAD or NADP as acceptor;oxidoreductase activity, acting on the CH-NH group of donor…	cell part;cytoplasmic part;intracellular membrane-bounded organelle;intracellular organelle;intracellular part;membrane-bounded organelle;mitochondrion;organelle	One carbon pool by folate	1	3.4e-07	95.347	95.347	-0.53195	37801000
Q8R0Y6	290	Q8R0Y6	Cytosolic 10-formyltetrahydrofolate dehydrogenase	Aldh1l1	AGLILFGNDDRMLLVKNIQLEDGKMMPASQF	NaN		0.507416	-0.669917	-1.17733	#DIV/0!		2	___1	10-formyltetrahydrofolate catabolic process;10-formyltetrahydrofolate metabolic process;aromatic compound catabolic process;biosynthetic process;catabolic process;cellular aromatic compound metabolic process;cellular catabolic process;cellular metabolic process;cellular nitrogen compound catabolic process;cellular nitrogen compound metabolic process;cellular process;coenzyme catabolic process;coe…	catalytic activity;formyltetrahydrofolate dehydrogenase activity;hydroxymethyl-, formyl- and related transferase activity;methyltransferase activity;oxidoreductase activity;oxidoreductase activity, acting on the aldehyde or oxo group of donors;oxidoreductase activity, acting on the aldehyde or oxo group of donors, NAD or NADP as acceptor;oxidoreductase activity, acting on the CH-NH group of donor…	cell part;cytoplasmic part;intracellular membrane-bounded organelle;intracellular organelle;intracellular part;membrane-bounded organelle;mitochondrion;organelle	One carbon pool by folate	1	5.47e-11	126.95	126.95	1.8408	31929000
Q8R0Y6	205	Q8R0Y6	Cytosolic 10-formyltetrahydrofolate dehydrogenase	Aldh1l1	RRPQPEEGATYEGIQKKETAMINWDQPAEAI	NaN		0.507416	-0.669917	-1.17733	#DIV/0!		3	___1	10-formyltetrahydrofolate catabolic process;10-formyltetrahydrofolate metabolic process;aromatic compound catabolic process;biosynthetic process;catabolic process;cellular aromatic compound metabolic process;cellular catabolic process;cellular metabolic process;cellular nitrogen compound catabolic process;cellular nitrogen compound metabolic process;cellular process;coenzyme catabolic process;coe…	catalytic activity;formyltetrahydrofolate dehydrogenase activity;hydroxymethyl-, formyl- and related transferase activity;methyltransferase activity;oxidoreductase activity;oxidoreductase activity, acting on the aldehyde or oxo group of donors;oxidoreductase activity, acting on the aldehyde or oxo group of donors, NAD or NADP as acceptor;oxidoreductase activity, acting on the CH-NH group of donor…	cell part;cytoplasmic part;intracellular membrane-bounded organelle;intracellular organelle;intracellular part;membrane-bounded organelle;mitochondrion;organelle	One carbon pool by folate	1	0.00559186	80.545	80.545	-0.12093	44831000
Q8R0Y6	876	Q8R0Y6	Cytosolic 10-formyltetrahydrofolate dehydrogenase	Aldh1l1	NTYNKTDVAAPFGGFKQSGFGKDLGEAALNE	NaN		0.507416	-0.669917	-1.17733	#DIV/0!		3	___1	10-formyltetrahydrofolate catabolic process;10-formyltetrahydrofolate metabolic process;aromatic compound catabolic process;biosynthetic process;catabolic process;cellular aromatic compound metabolic process;cellular catabolic process;cellular metabolic process;cellular nitrogen compound catabolic process;cellular nitrogen compound metabolic process;cellular process;coenzyme catabolic process;coe…	catalytic activity;formyltetrahydrofolate dehydrogenase activity;hydroxymethyl-, formyl- and related transferase activity;methyltransferase activity;oxidoreductase activity;oxidoreductase activity, acting on the aldehyde or oxo group of donors;oxidoreductase activity, acting on the aldehyde or oxo group of donors, NAD or NADP as acceptor;oxidoreductase activity, acting on the CH-NH group of donor…	cell part;cytoplasmic part;intracellular membrane-bounded organelle;intracellular organelle;intracellular part;membrane-bounded organelle;mitochondrion;organelle	One carbon pool by folate	1	3.57e-56	151.99	138.54	-1.124	1278000000
P47738;D3YYF3	157;156	P47738	Aldehyde dehydrogenase, mitochondrial	Aldh2;Aldh2	DMVLKCLRYYAGWADKYHGKTIPIDGDFFSY	NaN		0.233332	0.284385	0.0510534	#DIV/0!		3	___1	alcohol catabolic process;alcohol metabolic process;catabolic process;ethanol catabolic process;ethanol metabolic process;metabolic process;primary alcohol catabolic process;primary alcohol metabolic process;small molecule catabolic process;small molecule metabolic process	aldehyde dehydrogenase (NAD) activity;catalytic activity;oxidoreductase activity;oxidoreductase activity, acting on the aldehyde or oxo group of donors;oxidoreductase activity, acting on the aldehyde or oxo group of donors, NAD or NADP as acceptor	cell part;cytoplasmic part;intracellular membrane-bounded organelle;intracellular organelle;intracellular organelle lumen;intracellular organelle part;intracellular part;membrane-bounded organelle;membrane-enclosed lumen;mitochondrial matrix;mitochondrial part;mitochondrion;organelle;organelle lumen;organelle part	Arginine and proline metabolism;Ascorbate and aldarate metabolism;beta-Alanine metabolism;Chloroalkane and chloroalkene degradation;Fatty acid metabolism;Glycerolipid metabolism;Glycolysis / Gluconeogenesis;Histidine metabolism;Limonene and pinene degradation;Lysine degradation;Pentose and glucuronate interconversions;Propanoate metabolism;Pyruvate metabolism;Tryptophan metabolism;Valine, leucine…	1	0.000292789	94.191	94.191	-0.52894	18137000
Q8CHT0	129	Q8CHT0	Delta-1-pyrroline-5-carboxylate dehydrogenase, mitochondrial	Aldh4a1	EWDLKPMADRAQVFLKAADMLSGPRRAEVLA	NaN		0.312884	-0.175904	-0.488788	#DIV/0!		2	___1	amine biosynthetic process;amine catabolic process;amine metabolic process;biosynthetic process;carboxylic acid biosynthetic process;carboxylic acid catabolic process;carboxylic acid metabolic process;catabolic process;cellular amine metabolic process;cellular amino acid biosynthetic process;cellular amino acid catabolic process;cellular amino acid metabolic process;cellular biosynthetic process;…	1-pyrroline-5-carboxylate dehydrogenase activity;catalytic activity;oxidoreductase activity;oxidoreductase activity, acting on the aldehyde or oxo group of donors;oxidoreductase activity, acting on the aldehyde or oxo group of donors, NAD or NADP as acceptor;oxidoreductase activity, acting on the CH-NH group of donors;oxidoreductase activity, acting on the CH-NH group of donors, NAD or NADP as ac…	cell part;cytoplasmic part;intracellular membrane-bounded organelle;intracellular organelle;intracellular organelle lumen;intracellular organelle part;intracellular part;membrane-bounded organelle;membrane-enclosed lumen;mitochondrial matrix;mitochondrial part;mitochondrion;organelle;organelle lumen;organelle part	Alanine, aspartate and glutamate metabolism;Arginine and proline metabolism	1	1.11e-13	117.37	117.37	-1.4189	27716000
Q9DBF1;Q9DBF1-2	389;361	Q9DBF1;Q9DBF1-2	Alpha-aminoadipic semialdehyde dehydrogenase	Aldh7a1	TKQAVSMFVRAVEEAKKQGGTVVYGGKVMDH	NaN		#VALUE!	NaN	NaN	#DIV/0!		2	___2	alcohol metabolic process;amine biosynthetic process;amine metabolic process;betaine biosynthetic process;betaine metabolic process;biosynthetic process;carboxylic acid biosynthetic process;carboxylic acid metabolic process;cellular amine metabolic process;cellular amino acid biosynthetic process;cellular amino acid metabolic process;cellular biogenic amine metabolic process;cellular biosynthetic…	betaine-aldehyde dehydrogenase activity;catalytic activity;L-aminoadipate-semialdehyde dehydrogenase activity;oxidoreductase activity;oxidoreductase activity, acting on the aldehyde or oxo group of donors;oxidoreductase activity, acting on the aldehyde or oxo group of donors, NAD or NADP as acceptor	cell part;cytoplasmic part;cytosol;intracellular membrane-bounded organelle;intracellular organelle;intracellular part;membrane-bounded organelle;mitochondrion;nucleus;organelle	Arginine and proline metabolism;Ascorbate and aldarate metabolism;beta-Alanine metabolism;Fatty acid metabolism;Glycerolipid metabolism;Glycine, serine and threonine metabolism;Glycolysis / Gluconeogenesis;Histidine metabolism;Lysine biosynthesis;Lysine degradation;Propanoate metabolism;Pyruvate metabolism;Tryptophan metabolism;Valine, leucine and isoleucine degradation	1	2.16e-08	120.24	120.24	0.61082	4397600
Q9DBF1;Q9DBF1-2	390;362	Q9DBF1;Q9DBF1-2	Alpha-aminoadipic semialdehyde dehydrogenase	Aldh7a1	KQAVSMFVRAVEEAKKQGGTVVYGGKVMDHP	NaN		#VALUE!	NaN	NaN	#DIV/0!		2	___2	alcohol metabolic process;amine biosynthetic process;amine metabolic process;betaine biosynthetic process;betaine metabolic process;biosynthetic process;carboxylic acid biosynthetic process;carboxylic acid metabolic process;cellular amine metabolic process;cellular amino acid biosynthetic process;cellular amino acid metabolic process;cellular biogenic amine metabolic process;cellular biosynthetic…	betaine-aldehyde dehydrogenase activity;catalytic activity;L-aminoadipate-semialdehyde dehydrogenase activity;oxidoreductase activity;oxidoreductase activity, acting on the aldehyde or oxo group of donors;oxidoreductase activity, acting on the aldehyde or oxo group of donors, NAD or NADP as acceptor	cell part;cytoplasmic part;cytosol;intracellular membrane-bounded organelle;intracellular organelle;intracellular part;membrane-bounded organelle;mitochondrion;nucleus;organelle	Arginine and proline metabolism;Ascorbate and aldarate metabolism;beta-Alanine metabolism;Fatty acid metabolism;Glycerolipid metabolism;Glycine, serine and threonine metabolism;Glycolysis / Gluconeogenesis;Histidine metabolism;Lysine biosynthesis;Lysine degradation;Propanoate metabolism;Pyruvate metabolism;Tryptophan metabolism;Valine, leucine and isoleucine degradation	1	2.16e-08	120.24	120.24	0.61082	4397600
Q9DBF1;G3UYR8;Q9DBF1-2	462;398;434	Q9DBF1;Q9DBF1-2	Alpha-aminoadipic semialdehyde dehydrogenase	Aldh7a1;Aldh7a1	WNNEVKQGLSSSIFTKDLGRIFRWLGPKGSD	NaN		#VALUE!	NaN	NaN	#DIV/0!		2	___1	alcohol metabolic process;amine biosynthetic process;amine metabolic process;betaine biosynthetic process;betaine metabolic process;biosynthetic process;carboxylic acid biosynthetic process;carboxylic acid metabolic process;cellular amine metabolic process;cellular amino acid biosynthetic process;cellular amino acid metabolic process;cellular biogenic amine metabolic process;cellular biosynthetic…	betaine-aldehyde dehydrogenase activity;catalytic activity;L-aminoadipate-semialdehyde dehydrogenase activity;oxidoreductase activity;oxidoreductase activity, acting on the aldehyde or oxo group of donors;oxidoreductase activity, acting on the aldehyde or oxo group of donors, NAD or NADP as acceptor	cell part;cytoplasmic part;cytosol;intracellular membrane-bounded organelle;intracellular organelle;intracellular part;membrane-bounded organelle;mitochondrion;nucleus;organelle	Arginine and proline metabolism;Ascorbate and aldarate metabolism;beta-Alanine metabolism;Fatty acid metabolism;Glycerolipid metabolism;Glycine, serine and threonine metabolism;Glycolysis / Gluconeogenesis;Histidine metabolism;Lysine biosynthesis;Lysine degradation;Propanoate metabolism;Pyruvate metabolism;Tryptophan metabolism;Valine, leucine and isoleucine degradation	1	0.000174385	82.102	82.102	1.7401	14263000
Q9DBF1;G3UYR8;G3UY72;E9Q1H3;Q9DBF1-2	86;86;84;87;58	Q9DBF1;Q9DBF1-2	Alpha-aminoadipic semialdehyde dehydrogenase	Aldh7a1;Aldh7a1;Aldh7a1;Aldh7a1	PANNEPIARVRQASLKDYEETIGKAKKAWNI	NaN		#VALUE!	NaN	NaN	#DIV/0!		2	___2	alcohol metabolic process;amine biosynthetic process;amine metabolic process;betaine biosynthetic process;betaine metabolic process;biosynthetic process;carboxylic acid biosynthetic process;carboxylic acid metabolic process;cellular amine metabolic process;cellular amino acid biosynthetic process;cellular amino acid metabolic process;cellular biogenic amine metabolic process;cellular biosynthetic…	betaine-aldehyde dehydrogenase activity;catalytic activity;L-aminoadipate-semialdehyde dehydrogenase activity;oxidoreductase activity;oxidoreductase activity, acting on the aldehyde or oxo group of donors;oxidoreductase activity, acting on the aldehyde or oxo group of donors, NAD or NADP as acceptor	cell part;cytoplasmic part;cytosol;intracellular membrane-bounded organelle;intracellular organelle;intracellular part;membrane-bounded organelle;mitochondrion;nucleus;organelle	Arginine and proline metabolism;Ascorbate and aldarate metabolism;beta-Alanine metabolism;Fatty acid metabolism;Glycerolipid metabolism;Glycine, serine and threonine metabolism;Glycolysis / Gluconeogenesis;Histidine metabolism;Lysine biosynthesis;Lysine degradation;Propanoate metabolism;Pyruvate metabolism;Tryptophan metabolism;Valine, leucine and isoleucine degradation	1	2.63e-73	238.88	80.411	1.5895	3971300000
Q9DBF1;G3UYR8;G3UY72;E9Q1H3;Q9DBF1-2	94;94;92;95;66	Q9DBF1;Q9DBF1-2	Alpha-aminoadipic semialdehyde dehydrogenase	Aldh7a1;Aldh7a1;Aldh7a1;Aldh7a1	RVRQASLKDYEETIGKAKKAWNIWADIPAPK	NaN		#VALUE!	NaN	NaN	#DIV/0!		2	___2	alcohol metabolic process;amine biosynthetic process;amine metabolic process;betaine biosynthetic process;betaine metabolic process;biosynthetic process;carboxylic acid biosynthetic process;carboxylic acid metabolic process;cellular amine metabolic process;cellular amino acid biosynthetic process;cellular amino acid metabolic process;cellular biogenic amine metabolic process;cellular biosynthetic…	betaine-aldehyde dehydrogenase activity;catalytic activity;L-aminoadipate-semialdehyde dehydrogenase activity;oxidoreductase activity;oxidoreductase activity, acting on the aldehyde or oxo group of donors;oxidoreductase activity, acting on the aldehyde or oxo group of donors, NAD or NADP as acceptor	cell part;cytoplasmic part;cytosol;intracellular membrane-bounded organelle;intracellular organelle;intracellular part;membrane-bounded organelle;mitochondrion;nucleus;organelle	Arginine and proline metabolism;Ascorbate and aldarate metabolism;beta-Alanine metabolism;Fatty acid metabolism;Glycerolipid metabolism;Glycine, serine and threonine metabolism;Glycolysis / Gluconeogenesis;Histidine metabolism;Lysine biosynthesis;Lysine degradation;Propanoate metabolism;Pyruvate metabolism;Tryptophan metabolism;Valine, leucine and isoleucine degradation	1	8.72e-05	80.411	80.411	1.5895	12003000
Q8BH00	4	Q8BH00	Aldehyde dehydrogenase family 8 member A1	Aldh8a1	____________MAGKRELLMLENFIGGKFL	NaN		0.134295	-0.0190395	-0.153335	#DIV/0!		3	___1	9-cis-retinoic acid biosynthetic process;9-cis-retinoic acid metabolic process;apocarotenoid metabolic process;biological regulation;biosynthetic process;carboxylic acid metabolic process;cellular aldehyde metabolic process;cellular biosynthetic process;cellular hormone metabolic process;cellular ketone metabolic process;cellular lipid metabolic process;cellular metabolic process;cellular process…	catalytic activity;oxidoreductase activity;oxidoreductase activity, acting on the aldehyde or oxo group of donors;oxidoreductase activity, acting on the aldehyde or oxo group of donors, NAD or NADP as acceptor;retinal dehydrogenase activity	cell part;cytoplasm;intracellular;intracellular part		1	1.09e-13	111.7	111.7	-0.35719	303830000
Q8BH00	305	Q8BH00	Aldehyde dehydrogenase family 8 member A1	Aldh8a1	TSRIFVQRSIYSEFLKRFVEATRKWKVGVPS	NaN		0.134295	-0.0190395	-0.153335	#DIV/0!		2	___1	9-cis-retinoic acid biosynthetic process;9-cis-retinoic acid metabolic process;apocarotenoid metabolic process;biological regulation;biosynthetic process;carboxylic acid metabolic process;cellular aldehyde metabolic process;cellular biosynthetic process;cellular hormone metabolic process;cellular ketone metabolic process;cellular lipid metabolic process;cellular metabolic process;cellular process…	catalytic activity;oxidoreductase activity;oxidoreductase activity, acting on the aldehyde or oxo group of donors;oxidoreductase activity, acting on the aldehyde or oxo group of donors, NAD or NADP as acceptor;retinal dehydrogenase activity	cell part;cytoplasm;intracellular;intracellular part		1	0.00165706	93.649	87.913	2.4799	66226000
Q3U367;Q9JLJ2	334;310	Q3U367	4-trimethylaminobutyraldehyde dehydrogenase	Aldh9a1;Aldh9a1	FVQKEIADKFINEVVKQTQKIKLGDPLLEDT	NaN		0.208617	0.209382	0.00076541	#DIV/0!		2	___1	amine biosynthetic process;amine metabolic process;betaine biosynthetic process;betaine metabolic process;biological regulation;biosynthetic process;carboxylic acid biosynthetic process;carboxylic acid metabolic process;carnitine biosynthetic process;carnitine metabolic process;cellular aldehyde metabolic process;cellular amine metabolic process;cellular amino acid biosynthetic process;cellular a…	4-trimethylammoniobutyraldehyde dehydrogenase activity;aldehyde dehydrogenase (NAD) activity;catalytic activity;oxidoreductase activity;oxidoreductase activity, acting on the aldehyde or oxo group of donors;oxidoreductase activity, acting on the aldehyde or oxo group of donors, NAD or NADP as acceptor	cell part;cytoplasmic part;cytosol;intracellular membrane-bounded organelle;intracellular organelle;intracellular part;membrane;membrane-bounded organelle;mitochondrion;organelle;plasma membrane	Arginine and proline metabolism;Ascorbate and aldarate metabolism;beta-Alanine metabolism;Fatty acid metabolism;Glycerolipid metabolism;Glycolysis / Gluconeogenesis;Histidine metabolism;Lysine degradation;Propanoate metabolism;Pyruvate metabolism;Tryptophan metabolism;Valine, leucine and isoleucine degradation	1	2.87e-30	188.27	188.27	1.3815	54529000
Q91Y97	13	Q91Y97	Fructose-bisphosphate aldolase B	Aldob	___MAHRFPALTPEQKKELSEIAQRIVANGK	NaN		0.924447	0.413656	-0.510791	#DIV/0!		3	___1	alcohol catabolic process;alcohol metabolic process;biological regulation;carbohydrate catabolic process;carbohydrate metabolic process;catabolic process;cellular carbohydrate catabolic process;cellular carbohydrate metabolic process;cellular component assembly;cellular component assembly at cellular level;cellular component organization;cellular component organization at cellular level;cellular …	aldehyde-lyase activity;binding;carbohydrate binding;carbon-carbon lyase activity;catalytic activity;fructose binding;fructose-bisphosphate aldolase activity;lyase activity;monosaccharide binding;sugar binding	cell part;centriolar satellite;cytoplasmic part;cytoskeletal part;intracellular organelle part;intracellular part;microtubule organizing center part;organelle part	Carbon fixation in photosynthetic organisms;Fructose and mannose metabolism;Glycolysis / Gluconeogenesis;Pentose phosphate pathway	1	3.11e-05	92.781	92.781	-0.031126	16126000
Q91Y97	48	Q91Y97	Fructose-bisphosphate aldolase B	Aldob	ADESVGTMGNRLQRIKVENTEENRRQFRELL	NaN		0.924447	0.413656	-0.510791	#DIV/0!		2	___1	alcohol catabolic process;alcohol metabolic process;biological regulation;carbohydrate catabolic process;carbohydrate metabolic process;catabolic process;cellular carbohydrate catabolic process;cellular carbohydrate metabolic process;cellular component assembly;cellular component assembly at cellular level;cellular component organization;cellular component organization at cellular level;cellular …	aldehyde-lyase activity;binding;carbohydrate binding;carbon-carbon lyase activity;catalytic activity;fructose binding;fructose-bisphosphate aldolase activity;lyase activity;monosaccharide binding;sugar binding	cell part;centriolar satellite;cytoplasmic part;cytoskeletal part;intracellular organelle part;intracellular part;microtubule organizing center part;organelle part	Carbon fixation in photosynthetic organisms;Fructose and mannose metabolism;Glycolysis / Gluconeogenesis;Pentose phosphate pathway	1	0.000652884	89.403	89.403	-0.25967	90917000
P05063;A6ZI44;P05064;D3YWI1;A6ZI47;Q9CPQ9	147;201;147;147;147;147	P05063;A6ZI44;Q9CPQ9	Fructose-bisphosphate aldolase C;Fructose-bisphosphate aldolase;Fructose-bisphosphate aldolase A;Fructose-bisphosphate aldolase;Fructose-bisphosphate aldolase;Fructose-bisphosphate aldolase	Aldoc;Aldoa;Aldoa;Aldoa;Aldoart2;Aldoart1	LERCAQYKKDGADFAKWRCVLKISDRTPSAL;SERCAQYKKDGADFAKWRCVLKIGEHTPSAL;SERCAQYKKDGADFAKWRCVLKIGKHTPSPL	NaN		0.0793091	-0.555131	-0.63444	#DIV/0!		2	___1	aging;alcohol catabolic process;alcohol metabolic process;anatomical structure morphogenesis;apoptosis;carbohydrate catabolic process;carbohydrate metabolic process;catabolic process;cell death;cellular carbohydrate catabolic process;cellular carbohydrate metabolic process;cellular component assembly;cellular component organization;cellular component organization or biogenesis;cellular metabolic …	aldehyde-lyase activity;carbon-carbon lyase activity;catalytic activity;fructose-bisphosphate aldolase activity;lyase activity	axon;cell part;cell projection;contractile fiber part;cytoplasmic part;intracellular membrane-bounded organelle;intracellular organelle;intracellular part;macromolecular complex;membrane;membrane-bounded organelle;mitochondrion;neuron projection;organelle;organelle part;protein complex;Z disc	Carbon fixation in photosynthetic organisms;Fructose and mannose metabolism;Glycolysis / Gluconeogenesis;Pentose phosphate pathway	1	0.00499944	75.294	75.294	0.37977	8331900
P48036	68	P48036	Annexin A5	Anxa5	QEFKTLFGRDLVDDLKSELTGKFEKLIVAMM	NaN		0.654102	0.31602	-0.338081	#DIV/0!		2	___1	biological regulation;blood coagulation;coagulation;hemostasis;multicellular organismal process;negative regulation of biological process;negative regulation of coagulation;negative regulation of multicellular organismal process;regulation of biological process;regulation of biological quality;regulation of body fluid levels;regulation of coagulation;regulation of multicellular organismal process…	binding;calcium ion binding;calcium-dependent phospholipid binding;cation binding;cell surface binding;eukaryotic cell surface binding;ion binding;lipid binding;metal ion binding;phospholipid binding	blood microparticle;cell part;endothelial microparticle;external side of plasma membrane;extracellular region part;intracellular;membrane part;plasma membrane part		1	0.000417918	92.457	92.457	-0.73003	50293000
P48036	74	P48036	Annexin A5	Anxa5	FGRDLVDDLKSELTGKFEKLIVAMMKPSRLY	NaN		0.654102	0.31602	-0.338081	#DIV/0!		2	___1	biological regulation;blood coagulation;coagulation;hemostasis;multicellular organismal process;negative regulation of biological process;negative regulation of coagulation;negative regulation of multicellular organismal process;regulation of biological process;regulation of biological quality;regulation of body fluid levels;regulation of coagulation;regulation of multicellular organismal process…	binding;calcium ion binding;calcium-dependent phospholipid binding;cation binding;cell surface binding;eukaryotic cell surface binding;ion binding;lipid binding;metal ion binding;phospholipid binding	blood microparticle;cell part;endothelial microparticle;external side of plasma membrane;extracellular region part;intracellular;membrane part;plasma membrane part		1	0.00278813	83.869	79.974	-0.5426	50962000
F8WIT2;P14824	75;75	F8WIT2;P14824	Annexin;Annexin A6	Anxa6;Anxa6	QNYKSLYGKDLIEDLKYELTGKFERLIVNLM	NaN		0.621083	0.125875	-0.495208	#DIV/0!		3	___1	biological regulation;calcium ion transport;cation transport;divalent inorganic cation transport;divalent metal ion transport;establishment of localization;ion transport;metal ion transport;regulation of biological process;regulation of multicellular organismal process;regulation of muscle contraction;regulation of muscle system process;regulation of system process;transport	binding;calcium ion binding;calcium-dependent phospholipid binding;cation binding;ion binding;lipid binding;metal ion binding;phospholipid binding	cell part;cytoplasmic membrane-bounded vesicle;cytoplasmic part;cytoplasmic vesicle;intracellular membrane-bounded organelle;intracellular organelle;intracellular part;melanosome;membrane-bounded organelle;membrane-bounded vesicle;organelle;perinuclear region of cytoplasm;pigment granule;vesicle		1	1.65e-07	127.36	78.814	3.3681	171040000
F8WIT2;P14824	418;418	F8WIT2;P14824	Annexin;Annexin A6	Anxa6;Anxa6	QTFKSHFGRDLMADLKSEISGDLARLILGLM	NaN		0.621083	0.125875	-0.495208	#DIV/0!		2	___1	biological regulation;calcium ion transport;cation transport;divalent inorganic cation transport;divalent metal ion transport;establishment of localization;ion transport;metal ion transport;regulation of biological process;regulation of multicellular organismal process;regulation of muscle contraction;regulation of muscle system process;regulation of system process;transport	binding;calcium ion binding;calcium-dependent phospholipid binding;cation binding;ion binding;lipid binding;metal ion binding;phospholipid binding	cell part;cytoplasmic membrane-bounded vesicle;cytoplasmic part;cytoplasmic vesicle;intracellular membrane-bounded organelle;intracellular organelle;intracellular part;melanosome;membrane-bounded organelle;membrane-bounded vesicle;organelle;perinuclear region of cytoplasm;pigment granule;vesicle		1	7.28e-80	198.95	141.86	0.86881	101080000
F8WIT2;P14824	614;620	F8WIT2;P14824	Annexin;Annexin A6	Anxa6;Anxa6	ADKLYKSMKGAGTDEKTLTRVMVSRSEIDLL	NaN		0.621083	0.125875	-0.495208	#DIV/0!		2	___1	biological regulation;calcium ion transport;cation transport;divalent inorganic cation transport;divalent metal ion transport;establishment of localization;ion transport;metal ion transport;regulation of biological process;regulation of multicellular organismal process;regulation of muscle contraction;regulation of muscle system process;regulation of system process;transport	binding;calcium ion binding;calcium-dependent phospholipid binding;cation binding;ion binding;lipid binding;metal ion binding;phospholipid binding	cell part;cytoplasmic membrane-bounded vesicle;cytoplasmic part;cytoplasmic vesicle;intracellular membrane-bounded organelle;intracellular organelle;intracellular part;melanosome;membrane-bounded organelle;membrane-bounded vesicle;organelle;perinuclear region of cytoplasm;pigment granule;vesicle		1	1.83e-08	143.79	126.71	-0.15527	412360000
F8WGC2;Q07076	306;284	F8WGC2	Annexin;Annexin A7	Anxa7;Anxa7	DIVRCYQLEFGRDLEKDIRSDTSGHFERLLV	NaN		0.0887205	-0.0639168	-0.152637	#DIV/0!		2	___1	behavior;behavioral interaction between organisms;biological regulation;calcium ion homeostasis;cation homeostasis;cell proliferation;cell volume homeostasis;cellular calcium ion homeostasis;cellular cation homeostasis;cellular chemical homeostasis;cellular divalent inorganic cation homeostasis;cellular homeostasis;cellular ion homeostasis;cellular metal ion homeostasis;cellular process;cellular …	binding;calcium ion binding;calcium-dependent phospholipid binding;cation binding;ion binding;lipid binding;metal ion binding;phospholipid binding	cell part;cytoplasmic part;cytosol;envelope;intracellular organelle part;intracellular part;membrane;nuclear envelope;nuclear part;organelle;organelle envelope;organelle part;plasma membrane;vesicle		1	0.0682868	89.55	89.55	-0.32008	14532000
O35643;Q8CC13;Q5SVG4;Q5SVG5	265;265;238;238	O35643	AP-1 complex subunit beta-1	Ap1b1;Ap1b1;Ap1b1;Ap1b1	HANSAVVLSAVKVLMKFMEMLSKDLDYYATL	NaN		0.0213667	-0.0432618	-0.0646285	#DIV/0!		2	___1	cellular component organization;cellular component organization or biogenesis;cellular membrane organization;cellular process;endocytosis;establishment of localization;establishment of localization in cell;establishment of protein localization;intracellular protein transport;intracellular transport;membrane invagination;membrane organization;protein transport;transport;vesicle-mediated transport	protein transporter activity;substrate-specific transporter activity;transporter activity	AP-type membrane coat adaptor complex;cell part;clathrin adaptor complex;clathrin coated vesicle membrane;coated vesicle membrane;cytoplasmic part;cytoplasmic vesicle membrane;cytoplasmic vesicle part;Golgi apparatus;Golgi apparatus part;intracellular membrane-bounded organelle;intracellular organelle;intracellular organelle part;intracellular part;macromolecular complex;membrane;membrane part;me…	Lysosome	1	0.00357735	92.925	92.925	1.6731	81849000
P62331	138	P62331	ADP-ribosylation factor 6	Arf6	KQDLPDAMKPHEIQEKLGLTRIRDRNWYVQP	NaN		-0.0382582	-0.12485	-0.0865914	#DIV/0!		4	___1	actin cytoskeleton organization;actin filament-based process;anatomical structure development;apoptosis;biological regulation;cell death;cell projection organization;cellular component organization;cellular component organization at cellular level;cellular component organization or biogenesis;cellular component organization or biogenesis at cellular level;cellular localization;cellular macromolec…	binding;catalytic activity;GTP binding;GTPase activity;guanyl nucleotide binding;guanyl ribonucleotide binding;hydrolase activity;hydrolase activity, acting on acid anhydrides;hydrolase activity, acting on acid anhydrides, in phosphorus-containing anhydrides;nucleoside-triphosphatase activity;nucleotide binding;purine nucleotide binding;purine ribonucleoside triphosphate binding;purine ribonucleo…	cell cortex;cell part;cell projection;cell projection membrane;cell projection part;cytoplasmic membrane-bounded vesicle;cytoplasmic part;cytoplasmic vesicle;early endosome;endocytic vesicle;endosomal part;endosome;endosome membrane;filopodium membrane;Golgi apparatus;intracellular membrane-bounded organelle;intracellular organelle;intracellular organelle part;intracellular part;membrane;membrane…	Endocytosis;Fc gamma R-mediated phagocytosis	1	3.31e-60	157.85	157.85	-0.54549	29132000
A2A5R2	49	A2A5R2		Arfgef2	RACQVALDEIKAELEKQRLGAAAPPKANFIE	NaN		0.227032	-0.0284613	-0.255493	#DIV/0!		2	___1	biological regulation;cellular component organization;cellular component organization at cellular level;cellular component organization or biogenesis;cellular component organization or biogenesis at cellular level;cellular macromolecule metabolic process;cellular membrane organization;cellular metabolic process;cellular process;cellular response to stimulus;endomembrane system organization;endoso…	ARF guanyl-nucleotide exchange factor activity;binding;enzyme regulator activity;GABA receptor binding;GTPase regulator activity;guanyl-nucleotide exchange factor activity;nucleoside-triphosphatase regulator activity;protein binding;protein kinase A binding;protein kinase A regulatory subunit binding;receptor binding;small GTPase regulator activity	asymmetric synapse;axonemal microtubule;axoneme part;cell junction;cell part;cell projection;cell projection part;cytoplasmic membrane-bounded vesicle;cytoplasmic part;cytoplasmic vesicle;cytoskeletal part;cytosol;dendritic spine;endosome;Golgi apparatus part;Golgi membrane;intracellular membrane-bounded organelle;intracellular organelle;intracellular organelle part;intracellular part;macromolecu…		1	0.0652343	91.906	91.906	-1.3469	611820000
Q61176	39	Q61176	Arginase-1	Arg1	VEKGPAALRKAGLLEKLKETEYDVRDHGDLA	NaN		-0.112493	-0.280074	-0.167581	#DIV/0!		2	___1	amide biosynthetic process;amine metabolic process;anatomical structure development;arginine metabolic process;biological regulation;biosynthetic process;carboxylic acid metabolic process;cellular amide metabolic process;cellular amine metabolic process;cellular amino acid metabolic process;cellular biosynthetic process;cellular component assembly;cellular component organization;cellular componen…	arginase activity;binding;catalytic activity;cation binding;hydrolase activity;hydrolase activity, acting on carbon-nitrogen (but not peptide) bonds;hydrolase activity, acting on carbon-nitrogen (but not peptide) bonds, in linear amidines;ion binding;manganese ion binding;metal ion binding;transition metal ion binding	cell body;cell part;cell projection;cytoplasm;extracellular region part;extracellular space;intracellular part;neuron projection;neuronal cell body	Amoebiasis;Arginine and proline metabolism	1	0.00780898	85.161	85.161	0.57338	134260000
Q61176	41	Q61176	Arginase-1	Arg1	KGPAALRKAGLLEKLKETEYDVRDHGDLAFV	NaN		-0.112493	-0.280074	-0.167581	#DIV/0!		2	___1	amide biosynthetic process;amine metabolic process;anatomical structure development;arginine metabolic process;biological regulation;biosynthetic process;carboxylic acid metabolic process;cellular amide metabolic process;cellular amine metabolic process;cellular amino acid metabolic process;cellular biosynthetic process;cellular component assembly;cellular component organization;cellular componen…	arginase activity;binding;catalytic activity;cation binding;hydrolase activity;hydrolase activity, acting on carbon-nitrogen (but not peptide) bonds;hydrolase activity, acting on carbon-nitrogen (but not peptide) bonds, in linear amidines;ion binding;manganese ion binding;metal ion binding;transition metal ion binding	cell body;cell part;cell projection;cytoplasm;extracellular region part;extracellular space;intracellular part;neuron projection;neuronal cell body	Amoebiasis;Arginine and proline metabolism	1	0.00475862	79.693	76.228	-1.368	199460000
Q61176	196	Q61176	Arginase-1	Arg1	DVDPGEHYIIKTLGIKYFSMTEVDKLGIGKV	NaN		-0.112493	-0.280074	-0.167581	#DIV/0!		2	___1	amide biosynthetic process;amine metabolic process;anatomical structure development;arginine metabolic process;biological regulation;biosynthetic process;carboxylic acid metabolic process;cellular amide metabolic process;cellular amine metabolic process;cellular amino acid metabolic process;cellular biosynthetic process;cellular component assembly;cellular component organization;cellular componen…	arginase activity;binding;catalytic activity;cation binding;hydrolase activity;hydrolase activity, acting on carbon-nitrogen (but not peptide) bonds;hydrolase activity, acting on carbon-nitrogen (but not peptide) bonds, in linear amidines;ion binding;manganese ion binding;metal ion binding;transition metal ion binding	cell body;cell part;cell projection;cytoplasm;extracellular region part;extracellular space;intracellular part;neuron projection;neuronal cell body	Amoebiasis;Arginine and proline metabolism	1	4.79e-11	125.33	95.538	2.2658	154460000
Q61176	290	Q61176	Arginase-1	Arg1	IMEVNPTLGKTAEEVKSTVNTAVALTLACFG	NaN		-0.112493	-0.280074	-0.167581	#DIV/0!		3	___1	amide biosynthetic process;amine metabolic process;anatomical structure development;arginine metabolic process;biological regulation;biosynthetic process;carboxylic acid metabolic process;cellular amide metabolic process;cellular amine metabolic process;cellular amino acid metabolic process;cellular biosynthetic process;cellular component assembly;cellular component organization;cellular componen…	arginase activity;binding;catalytic activity;cation binding;hydrolase activity;hydrolase activity, acting on carbon-nitrogen (but not peptide) bonds;hydrolase activity, acting on carbon-nitrogen (but not peptide) bonds, in linear amidines;ion binding;manganese ion binding;metal ion binding;transition metal ion binding	cell body;cell part;cell projection;cytoplasm;extracellular region part;extracellular space;intracellular part;neuron projection;neuronal cell body	Amoebiasis;Arginine and proline metabolism	1	5.27e-31	131.43	131.43	-0.4108	46707000
Q9WV32	82	Q9WV32	Actin-related protein 2/3 complex subunit 1B	Arpc1b	IVTCGTDRNAYVWTLKGRTWKPTLVILRINR	NaN		-0.712809	0.304427	1.01724	#DIV/0!		2	___1	biological regulation;cellular component organization;cellular component organization or biogenesis;regulation of actin cytoskeleton organization;regulation of actin filament length;regulation of actin filament polymerization;regulation of actin filament-based process;regulation of actin polymerization or depolymerization;regulation of anatomical structure size;regulation of biological process;re…		Arp2/3 protein complex;cell part;cytoplasm;cytoskeletal part;intracellular organelle part;intracellular part;macromolecular complex;organelle part;protein complex	Bacterial invasion of epithelial cells;Fc gamma R-mediated phagocytosis;Pathogenic Escherichia coli infection;Regulation of actin cytoskeleton;Shigellosis	1	0.000310489	87.942	87.942	0.15953	40008000
Q91YI0;E0CXM2;E0CY49	69;69;69	Q91YI0	Argininosuccinate lyase	Asl;Asl;Asl	LLTKAEMQQILQGLDKVAEEWAQGTFKLHPN	NaN		0.343228	-0.287608	-0.630836	#DIV/0!		3	___1	amide biosynthetic process;amine biosynthetic process;amine metabolic process;ammonia assimilation cycle;arginine biosynthetic process;arginine biosynthetic process via ornithine;arginine metabolic process;behavior;biosynthetic process;carboxylic acid biosynthetic process;carboxylic acid metabolic process;cellular amide metabolic process;cellular amine metabolic process;cellular amino acid biosyn…	amidine-lyase activity;argininosuccinate lyase activity;carbon-nitrogen lyase activity;catalytic activity;lyase activity		Alanine, aspartate and glutamate metabolism;Arginine and proline metabolism	1	2.27e-44	98.015	98.015	-0.020339	374580000
Q91YI0;E0CXM2;E0CY49	7;7;7	Q91YI0	Argininosuccinate lyase	Asl;Asl;Asl	_________MASESGKLWGGRFVGAVDPIME	NaN		0.343228	-0.287608	-0.630836	#DIV/0!		2	___1	amide biosynthetic process;amine biosynthetic process;amine metabolic process;ammonia assimilation cycle;arginine biosynthetic process;arginine biosynthetic process via ornithine;arginine metabolic process;behavior;biosynthetic process;carboxylic acid biosynthetic process;carboxylic acid metabolic process;cellular amide metabolic process;cellular amine metabolic process;cellular amino acid biosyn…	amidine-lyase activity;argininosuccinate lyase activity;carbon-nitrogen lyase activity;catalytic activity;lyase activity		Alanine, aspartate and glutamate metabolism;Arginine and proline metabolism	1	0.000802351	79.286	79.286	1.4809	11178000
Q91YI0;E0CXM2;F7D439	288;262;91	Q91YI0	Argininosuccinate lyase	Asl;Asl;Asl	LSDAYSTGSSLMPQKKNPDSLELIRSKAGRV	NaN		0.343228	-0.287608	-0.630836	#DIV/0!		2	___1	amide biosynthetic process;amine biosynthetic process;amine metabolic process;ammonia assimilation cycle;arginine biosynthetic process;arginine biosynthetic process via ornithine;arginine metabolic process;behavior;biosynthetic process;carboxylic acid biosynthetic process;carboxylic acid metabolic process;cellular amide metabolic process;cellular amine metabolic process;cellular amino acid biosyn…	amidine-lyase activity;argininosuccinate lyase activity;carbon-nitrogen lyase activity;catalytic activity;lyase activity		Alanine, aspartate and glutamate metabolism;Arginine and proline metabolism	1	0.000359139	84.658	84.658	0.62915	10491000
Q91YI0;E0CXM2;E0CY49	97;97;97	Q91YI0	Argininosuccinate lyase	Asl;Asl;Asl	HPNDEDIHTANERRLKELIGEAAGKLHTGRS	NaN		0.343228	-0.287608	-0.630836	#DIV/0!		2	___1	amide biosynthetic process;amine biosynthetic process;amine metabolic process;ammonia assimilation cycle;arginine biosynthetic process;arginine biosynthetic process via ornithine;arginine metabolic process;behavior;biosynthetic process;carboxylic acid biosynthetic process;carboxylic acid metabolic process;cellular amide metabolic process;cellular amine metabolic process;cellular amino acid biosyn…	amidine-lyase activity;argininosuccinate lyase activity;carbon-nitrogen lyase activity;catalytic activity;lyase activity		Alanine, aspartate and glutamate metabolism;Arginine and proline metabolism	1	0.000832937	102.66	102.66	0.16023	30170000
Q91YI0;E0CXM2;E0CY49;E0CYV3	23;23;23;44	Q91YI0	Argininosuccinate lyase	Asl;Asl;Asl;Asl	LWGGRFVGAVDPIMEKFNSSISYDRHLWNVD	NaN		0.343228	-0.287608	-0.630836	#DIV/0!		2	___1	amide biosynthetic process;amine biosynthetic process;amine metabolic process;ammonia assimilation cycle;arginine biosynthetic process;arginine biosynthetic process via ornithine;arginine metabolic process;behavior;biosynthetic process;carboxylic acid biosynthetic process;carboxylic acid metabolic process;cellular amide metabolic process;cellular amine metabolic process;cellular amino acid biosyn…	amidine-lyase activity;argininosuccinate lyase activity;carbon-nitrogen lyase activity;catalytic activity;lyase activity		Alanine, aspartate and glutamate metabolism;Arginine and proline metabolism	1	2.39e-69	178.88	106.86	0.18313	868390000
Q9DCQ2;D3Z253	119;101	Q9DCQ2	Putative L-aspartate dehydrogenase	Aspdh;Aspdh	ALADQTTEQQLLEASKRWGHTVFVARGALWG	NaN		-0.685687	-0.0987885	0.586899	#DIV/0!		3	___1	biosynthetic process;catabolic process;cellular biosynthetic process;cellular catabolic process;cellular metabolic process;cellular nitrogen compound biosynthetic process;cellular nitrogen compound catabolic process;cellular nitrogen compound metabolic process;cellular process;coenzyme biosynthetic process;coenzyme catabolic process;coenzyme metabolic process;cofactor biosynthetic process;cofacto…	aspartate dehydrogenase activity;binding;catalytic activity;coenzyme binding;cofactor binding;NADP binding;nucleotide binding;oxidoreductase activity;oxidoreductase activity, acting on the CH-NH2 group of donors			1	2.36e-39	134.2	134.2	2.2709	8286700
P16460	229	P16460	Argininosuccinate synthase	Ass1	AKAPNSPDVLEIEFKKGVPVKVTNIKDGTTR	NaN		0.383189	-0.8487	-1.23189	#DIV/0!		3	___1	amide biosynthetic process;amine biosynthetic process;amine metabolic process;arginine biosynthetic process;arginine metabolic process;biosynthetic process;carboxylic acid biosynthetic process;carboxylic acid metabolic process;cellular amide metabolic process;cellular amine metabolic process;cellular amino acid biosynthetic process;cellular amino acid metabolic process;cellular biosynthetic proce…	adenyl nucleotide binding;adenyl ribonucleotide binding;argininosuccinate synthase activity;ATP binding;binding;catalytic activity;ligase activity;ligase activity, forming carbon-nitrogen bonds;nucleotide binding;purine nucleotide binding;purine ribonucleoside triphosphate binding;purine ribonucleotide binding;ribonucleotide binding	cell part;cytoplasmic part;intracellular membrane-bounded organelle;intracellular organelle;intracellular part;membrane-bounded organelle;mitochondrion;organelle	Alanine, aspartate and glutamate metabolism;Arginine and proline metabolism	0.893445	2.57e-51	165.06	106.03	0.17138	1449300000
P16460	49	P16460	Argininosuccinate synthase	Ass1	YLANIGQKEDFEEARKKALKLGAKKVFIEDV	NaN		0.383189	-0.8487	-1.23189	#DIV/0!		2	___1	amide biosynthetic process;amine biosynthetic process;amine metabolic process;arginine biosynthetic process;arginine metabolic process;biosynthetic process;carboxylic acid biosynthetic process;carboxylic acid metabolic process;cellular amide metabolic process;cellular amine metabolic process;cellular amino acid biosynthetic process;cellular amino acid metabolic process;cellular biosynthetic proce…	adenyl nucleotide binding;adenyl ribonucleotide binding;argininosuccinate synthase activity;ATP binding;binding;catalytic activity;ligase activity;ligase activity, forming carbon-nitrogen bonds;nucleotide binding;purine nucleotide binding;purine ribonucleoside triphosphate binding;purine ribonucleotide binding;ribonucleotide binding	cell part;cytoplasmic part;intracellular membrane-bounded organelle;intracellular organelle;intracellular part;membrane-bounded organelle;mitochondrion;organelle	Alanine, aspartate and glutamate metabolism;Arginine and proline metabolism	1	0.0577869	90.15	90.15	-0.30625	13916000
P16460	121	P16460	Argininosuccinate synthase	Ass1	AQREGAKYVSHGATGKGNDQVRFELTCYSLA	NaN		0.383189	-0.8487	-1.23189	#DIV/0!		2	___1	amide biosynthetic process;amine biosynthetic process;amine metabolic process;arginine biosynthetic process;arginine metabolic process;biosynthetic process;carboxylic acid biosynthetic process;carboxylic acid metabolic process;cellular amide metabolic process;cellular amine metabolic process;cellular amino acid biosynthetic process;cellular amino acid metabolic process;cellular biosynthetic proce…	adenyl nucleotide binding;adenyl ribonucleotide binding;argininosuccinate synthase activity;ATP binding;binding;catalytic activity;ligase activity;ligase activity, forming carbon-nitrogen bonds;nucleotide binding;purine nucleotide binding;purine ribonucleoside triphosphate binding;purine ribonucleotide binding;ribonucleotide binding	cell part;cytoplasmic part;intracellular membrane-bounded organelle;intracellular organelle;intracellular part;membrane-bounded organelle;mitochondrion;organelle	Alanine, aspartate and glutamate metabolism;Arginine and proline metabolism	1	1.34e-22	157.07	83.54	1.676	91614000
P16460	155	P16460	Argininosuccinate synthase	Ass1	KVIAPWRMPEFYNRFKGRNDLMEYAKQHGIP	NaN		0.383189	-0.8487	-1.23189	#DIV/0!		3	___1	amide biosynthetic process;amine biosynthetic process;amine metabolic process;arginine biosynthetic process;arginine metabolic process;biosynthetic process;carboxylic acid biosynthetic process;carboxylic acid metabolic process;cellular amide metabolic process;cellular amine metabolic process;cellular amino acid biosynthetic process;cellular amino acid metabolic process;cellular biosynthetic proce…	adenyl nucleotide binding;adenyl ribonucleotide binding;argininosuccinate synthase activity;ATP binding;binding;catalytic activity;ligase activity;ligase activity, forming carbon-nitrogen bonds;nucleotide binding;purine nucleotide binding;purine ribonucleoside triphosphate binding;purine ribonucleotide binding;ribonucleotide binding	cell part;cytoplasmic part;intracellular membrane-bounded organelle;intracellular organelle;intracellular part;membrane-bounded organelle;mitochondrion;organelle	Alanine, aspartate and glutamate metabolism;Arginine and proline metabolism	1	0.000285559	83.53	83.53	-0.42752	8308500
P16460	340	P16460	Argininosuccinate synthase	Ass1	FWHSPECEFVRHCIQKSQERVEGKVQVSVFK	NaN		0.383189	-0.8487	-1.23189	#DIV/0!		2	___1	amide biosynthetic process;amine biosynthetic process;amine metabolic process;arginine biosynthetic process;arginine metabolic process;biosynthetic process;carboxylic acid biosynthetic process;carboxylic acid metabolic process;cellular amide metabolic process;cellular amine metabolic process;cellular amino acid biosynthetic process;cellular amino acid metabolic process;cellular biosynthetic proce…	adenyl nucleotide binding;adenyl ribonucleotide binding;argininosuccinate synthase activity;ATP binding;binding;catalytic activity;ligase activity;ligase activity, forming carbon-nitrogen bonds;nucleotide binding;purine nucleotide binding;purine ribonucleoside triphosphate binding;purine ribonucleotide binding;ribonucleotide binding	cell part;cytoplasmic part;intracellular membrane-bounded organelle;intracellular organelle;intracellular part;membrane-bounded organelle;mitochondrion;organelle	Alanine, aspartate and glutamate metabolism;Arginine and proline metabolism	1	8.73e-06	140.78	140.78	0.58607	39660000
P16460	355	P16460	Argininosuccinate synthase	Ass1	KSQERVEGKVQVSVFKGQVYILGRESPLSLY	NaN		0.383189	-0.8487	-1.23189	#DIV/0!		2	___1	amide biosynthetic process;amine biosynthetic process;amine metabolic process;arginine biosynthetic process;arginine metabolic process;biosynthetic process;carboxylic acid biosynthetic process;carboxylic acid metabolic process;cellular amide metabolic process;cellular amine metabolic process;cellular amino acid biosynthetic process;cellular amino acid metabolic process;cellular biosynthetic proce…	adenyl nucleotide binding;adenyl ribonucleotide binding;argininosuccinate synthase activity;ATP binding;binding;catalytic activity;ligase activity;ligase activity, forming carbon-nitrogen bonds;nucleotide binding;purine nucleotide binding;purine ribonucleoside triphosphate binding;purine ribonucleotide binding;ribonucleotide binding	cell part;cytoplasmic part;intracellular membrane-bounded organelle;intracellular organelle;intracellular part;membrane-bounded organelle;mitochondrion;organelle	Alanine, aspartate and glutamate metabolism;Arginine and proline metabolism	1	6.92e-14	131.53	92.457	1.2816	8291000
Q9CWJ9	406	Q9CWJ9	Bifunctional purine biosynthesis protein PURH;Phosphoribosylaminoimidazolecarboxamide formyltransferase;IMP cyclohydrolase	Atic	NNGVVDKSLFSNIVTKNKDLPESALRDLIVA	NaN		-0.135528	-0.0947923	0.0407362	#DIV/0!		2	___1	anatomical structure development;anatomical structure morphogenesis;aromatic compound biosynthetic process;biosynthetic process;brainstem development;cellular aromatic compound metabolic process;cellular biosynthetic process;cellular metabolic process;cellular nitrogen compound biosynthetic process;cellular nitrogen compound metabolic process;cellular process;cerebellum development;cerebral corte…	binding;catalytic activity;cyclohydrolase activity;hydrolase activity;hydrolase activity, acting on carbon-nitrogen (but not peptide) bonds;hydrolase activity, acting on carbon-nitrogen (but not peptide) bonds, in cyclic amidines;hydroxymethyl-, formyl- and related transferase activity;identical protein binding;IMP cyclohydrolase activity;phosphoribosylaminoimidazolecarboxamide formyltransferase …	cell part;cytoplasmic part;intracellular membrane-bounded organelle;intracellular organelle;intracellular part;membrane-bounded organelle;mitochondrion;organelle	One carbon pool by folate;Purine metabolism	1	0.00070845	85.288	85.288	0.80757	17693000
O08997	60	O08997	Copper transport protein ATOX1	Atox1	EHSSDTLLATLNKTGKAVSYLGPK_______	NaN		0.324738	0.879513	0.554775	#DIV/0!		2	___1	biological regulation;cation homeostasis;cation transport;cellular cation homeostasis;cellular chemical homeostasis;cellular copper ion homeostasis;cellular homeostasis;cellular ion homeostasis;cellular process;chemical homeostasis;copper ion homeostasis;copper ion transport;establishment of localization;homeostatic process;ion homeostasis;ion transport;metal ion transport;regulation of biologica…	binding;cation binding;copper chaperone activity;copper ion binding;ion binding;metal ion binding;metallochaperone activity;transition metal ion binding		Mineral absorption	1	0.000920187	95.401	95.401	-0.63107	114340000
Q8VDN2;E9QAV3	487;221	Q8VDN2	Sodium/potassium-transporting ATPase subunit alpha-1	Atp1a1;Atp1a1	EKYSKIVEIPFNSTNKYQLSIHKNPNASEPK	NaN		-0.0715228	0.086291	0.157814	#DIV/0!		3	___1	ATP biosynthetic process;ATP metabolic process;biological regulation;biosynthetic process;cation transport;cellular biosynthetic process;cellular chemical homeostasis;cellular homeostasis;cellular ion homeostasis;cellular metabolic process;cellular nitrogen compound biosynthetic process;cellular nitrogen compound metabolic process;cellular potassium ion transport;cellular process;cellular respons…	4-nitrophenylphosphatase activity;active transmembrane transporter activity;adenyl nucleotide binding;adenyl ribonucleotide binding;ADP binding;alkali metal ion binding;ATP binding;ATPase activity;ATPase activity, coupled;ATPase activity, coupled to movement of substances;ATPase activity, coupled to transmembrane movement of ions;ATPase activity, coupled to transmembrane movement of ions, phospho…	basolateral plasma membrane;caveola;cell part;cytoplasmic membrane-bounded vesicle;cytoplasmic part;cytoplasmic vesicle;endoplasmic reticulum;endosome;Golgi apparatus;integral to membrane;intracellular membrane-bounded organelle;intracellular organelle;intracellular part;intrinsic to membrane;macromolecular complex;melanosome;membrane part;membrane raft;membrane-bounded organelle;membrane-bounded…	Aldosterone-regulated sodium reabsorption;Bile secretion;Carbohydrate digestion and absorption;Cardiac muscle contraction;Endocrine and other factor-regulated calcium reabsorption;Gastric acid secretion;Mineral absorption;Pancreatic secretion;Protein digestion and absorption;Proximal tubule bicarbonate reclamation;Salivary secretion	1	4.21e-32	136.2	89.846	-0.98352	193290000
Q03265;D3Z6F5	541;491	Q03265	ATP synthase subunit alpha, mitochondrial;ATP synthase subunit alpha	Atp5a1;Atp5a1	IRSDGKISEQSDAKLKEIVTNFLAGFEP___	NaN		-0.0439863	-0.0462232	-0.00223693	#DIV/0!		2	___1	ATP biosynthetic process;ATP hydrolysis coupled proton transport;ATP metabolic process;ATP synthesis coupled proton transport;biological regulation;biosynthetic process;cation transport;cellular biosynthetic process;cellular metabolic process;cellular nitrogen compound biosynthetic process;cellular nitrogen compound metabolic process;cellular process;developmental process;embryo development;energ…	active transmembrane transporter activity;adenyl nucleotide binding;adenyl ribonucleotide binding;ATP binding;ATPase activity;ATPase activity, coupled;ATPase activity, coupled to movement of substances;ATPase activity, coupled to transmembrane movement of ions;ATPase activity, coupled to transmembrane movement of substances;binding;catalytic activity;cation transmembrane transporter activity;cati…	cell part;cytoplasmic part;intracellular organelle part;intracellular part;macromolecular complex;membrane;membrane part;mitochondrial inner membrane;mitochondrial membrane;mitochondrial membrane part;mitochondrial part;mitochondrial proton-transporting ATP synthase complex;nuclear part;organelle inner membrane;organelle membrane;organelle part;plasma membrane;protein complex;proton-transporting …	Alzheimer's disease;Huntington's disease;Oxidative phosphorylation;Parkinson's disease	1	1.19e-10	125.53	103.76	0.13192	145350000
P56480	485	P56480	ATP synthase subunit beta, mitochondrial	Atp5b	VAEVFTGHMGKLVPLKETIKGFQQILAGEYD	NaN		-0.0608861	-0.125873	-0.0649869	#DIV/0!		2	___1	anatomical structure formation involved in morphogenesis;angiogenesis;ATP biosynthetic process;ATP catabolic process;ATP hydrolysis coupled proton transport;ATP metabolic process;ATP synthesis coupled proton transport;biological regulation;biosynthetic process;catabolic process;cation homeostasis;cation transport;cellular biosynthetic process;cellular catabolic process;cellular cation homeostasis…	active transmembrane transporter activity;adenyl nucleotide binding;adenyl ribonucleotide binding;ATP binding;ATPase activity;ATPase activity, coupled;ATPase activity, coupled to movement of substances;ATPase activity, coupled to transmembrane movement of ions;ATPase activity, coupled to transmembrane movement of substances;binding;catalytic activity;cation transmembrane transporter activity;cati…	cell part;cell surface;cytoplasmic part;intracellular non-membrane-bounded organelle;intracellular organelle;intracellular organelle part;intracellular part;macromolecular complex;membrane;membrane part;mitochondrial membrane part;mitochondrial nucleoid;mitochondrial part;mitochondrial proton-transporting ATP synthase complex;non-membrane-bounded organelle;nucleoid;organelle;organelle part;plasma…	Alzheimer's disease;Huntington's disease;Oxidative phosphorylation;Parkinson's disease	1	0.00438863	77.662	77.662	-0.80348	84766000
P56480	133	P56480	ATP synthase subunit beta, mitochondrial	Atp5b	GLVRGQKVLDSGAPIKIPVGPETLGRIMNVI	NaN		-0.0608861	-0.125873	-0.0649869	#DIV/0!		2	___1	anatomical structure formation involved in morphogenesis;angiogenesis;ATP biosynthetic process;ATP catabolic process;ATP hydrolysis coupled proton transport;ATP metabolic process;ATP synthesis coupled proton transport;biological regulation;biosynthetic process;catabolic process;cation homeostasis;cation transport;cellular biosynthetic process;cellular catabolic process;cellular cation homeostasis…	active transmembrane transporter activity;adenyl nucleotide binding;adenyl ribonucleotide binding;ATP binding;ATPase activity;ATPase activity, coupled;ATPase activity, coupled to movement of substances;ATPase activity, coupled to transmembrane movement of ions;ATPase activity, coupled to transmembrane movement of substances;binding;catalytic activity;cation transmembrane transporter activity;cati…	cell part;cell surface;cytoplasmic part;intracellular non-membrane-bounded organelle;intracellular organelle;intracellular organelle part;intracellular part;macromolecular complex;membrane;membrane part;mitochondrial membrane part;mitochondrial nucleoid;mitochondrial part;mitochondrial proton-transporting ATP synthase complex;non-membrane-bounded organelle;nucleoid;organelle;organelle part;plasma…	Alzheimer's disease;Huntington's disease;Oxidative phosphorylation;Parkinson's disease	1	1.81e-26	125.23	125.23	0.080445	21000000
A2AKU9;Q91VR2;Q8C2Q8;A2AKV3	197;197;173;173	A2AKU9;Q91VR2	ATP synthase gamma chain;ATP synthase subunit gamma, mitochondrial;ATP synthase gamma chain	Atp5c1;Atp5c1;Atp5c1;Atp5c1	EGSIIFNQFKSVISYKTEEKPIFSLNTIATA	NaN		-0.0222563	-0.00129704	0.0209593	#DIV/0!		2	___1	ATP biosynthetic process;ATP metabolic process;ATP synthesis coupled proton transport;biosynthetic process;cation transport;cellular biosynthetic process;cellular metabolic process;cellular nitrogen compound biosynthetic process;cellular nitrogen compound metabolic process;cellular process;energy coupled proton transport, down electrochemical gradient;establishment of localization;heterocycle bio…	active transmembrane transporter activity;ATPase activity;ATPase activity, coupled;ATPase activity, coupled to movement of substances;ATPase activity, coupled to transmembrane movement of ions;ATPase activity, coupled to transmembrane movement of substances;catalytic activity;cation transmembrane transporter activity;cation-transporting ATPase activity;hydrogen ion transmembrane transporter activ…	cell part;cytoplasmic part;intracellular organelle part;intracellular part;macromolecular complex;membrane;membrane part;mitochondrial inner membrane;mitochondrial membrane;mitochondrial membrane part;mitochondrial part;mitochondrial proton-transporting ATP synthase complex;organelle inner membrane;organelle membrane;organelle part;protein complex;proton-transporting ATP synthase complex;proton-t…	Alzheimer's disease;Huntington's disease;Oxidative phosphorylation;Parkinson's disease	1	0.0208281	79.201	79.201	0.90069	15664000
A2AKU9;Q91VR2;Q8C2Q8;A2AKV3;A2AKV2;A2AKV1;A2AKV0	55;55;31;31;31;31;31	A2AKU9;Q91VR2	ATP synthase gamma chain;ATP synthase subunit gamma, mitochondrial;ATP synthase gamma chain	Atp5c1;Atp5c1;Atp5c1;Atp5c1;Atp5c1;Atp5c1;Atp5c1	NIQKITKSMKMVAAAKYARAERELKPARVYG	NaN		-0.0222563	-0.00129704	0.0209593	#DIV/0!		2	___1	ATP biosynthetic process;ATP metabolic process;ATP synthesis coupled proton transport;biosynthetic process;cation transport;cellular biosynthetic process;cellular metabolic process;cellular nitrogen compound biosynthetic process;cellular nitrogen compound metabolic process;cellular process;energy coupled proton transport, down electrochemical gradient;establishment of localization;heterocycle bio…	active transmembrane transporter activity;ATPase activity;ATPase activity, coupled;ATPase activity, coupled to movement of substances;ATPase activity, coupled to transmembrane movement of ions;ATPase activity, coupled to transmembrane movement of substances;catalytic activity;cation transmembrane transporter activity;cation-transporting ATPase activity;hydrogen ion transmembrane transporter activ…	cell part;cytoplasmic part;intracellular organelle part;intracellular part;macromolecular complex;membrane;membrane part;mitochondrial inner membrane;mitochondrial membrane;mitochondrial membrane part;mitochondrial part;mitochondrial proton-transporting ATP synthase complex;organelle inner membrane;organelle membrane;organelle part;protein complex;proton-transporting ATP synthase complex;proton-t…	Alzheimer's disease;Huntington's disease;Oxidative phosphorylation;Parkinson's disease	1	0.00142784	93.551	93.551	2.2433	17095000
Q9CQQ7	162	Q9CQQ7	ATP synthase subunit b, mitochondrial	Atp5f1	QDAIDMEKAQQALVQKRHYLFDVQRNNIALA	NaN		-0.146487	-0.11186	0.0346266	#DIV/0!		2	___1	ATP biosynthetic process;ATP metabolic process;ATP synthesis coupled proton transport;biosynthetic process;cation transport;cellular biosynthetic process;cellular metabolic process;cellular nitrogen compound biosynthetic process;cellular nitrogen compound metabolic process;cellular process;energy coupled proton transport, down electrochemical gradient;establishment of localization;heterocycle bio…	cation transmembrane transporter activity;hydrogen ion transmembrane transporter activity;hydrogen ion transporting ATP synthase activity, rotational mechanism;inorganic cation transmembrane transporter activity;ion transmembrane transporter activity;monovalent inorganic cation transmembrane transporter activity;substrate-specific transmembrane transporter activity;substrate-specific transporter …	cell part;cytoplasmic part;intracellular organelle part;intracellular part;macromolecular complex;membrane part;mitochondrial membrane part;mitochondrial part;mitochondrial proton-transporting ATP synthase complex, coupling factor F(o);organelle part;protein complex;proton-transporting ATP synthase complex, coupling factor F(o);proton-transporting two-sector ATPase complex, proton-transporting do…	Alzheimer's disease;Huntington's disease;Oxidative phosphorylation;Parkinson's disease	1	0.00277801	82.287	77.677	0.34741	151790000
Q9CQQ7	244	Q9CQQ7	ATP synthase subunit b, mitochondrial	Atp5f1	VQQEKETIAKCIEDLKLLAKKAQAQPIM___	NaN		-0.146487	-0.11186	0.0346266	#DIV/0!		2	___1	ATP biosynthetic process;ATP metabolic process;ATP synthesis coupled proton transport;biosynthetic process;cation transport;cellular biosynthetic process;cellular metabolic process;cellular nitrogen compound biosynthetic process;cellular nitrogen compound metabolic process;cellular process;energy coupled proton transport, down electrochemical gradient;establishment of localization;heterocycle bio…	cation transmembrane transporter activity;hydrogen ion transmembrane transporter activity;hydrogen ion transporting ATP synthase activity, rotational mechanism;inorganic cation transmembrane transporter activity;ion transmembrane transporter activity;monovalent inorganic cation transmembrane transporter activity;substrate-specific transmembrane transporter activity;substrate-specific transporter …	cell part;cytoplasmic part;intracellular organelle part;intracellular part;macromolecular complex;membrane part;mitochondrial membrane part;mitochondrial part;mitochondrial proton-transporting ATP synthase complex, coupling factor F(o);organelle part;protein complex;proton-transporting ATP synthase complex, coupling factor F(o);proton-transporting two-sector ATPase complex, proton-transporting do…	Alzheimer's disease;Huntington's disease;Oxidative phosphorylation;Parkinson's disease	1	0.000336728	94.465	79.201	0.28645	48369000
Q9CQQ7	139	Q9CQQ7	ATP synthase subunit b, mitochondrial	Atp5f1	IDKLNEEKIAQLEEVKQSSMKQIQDAIDMEK	NaN		-0.146487	-0.11186	0.0346266	#DIV/0!		2	___1	ATP biosynthetic process;ATP metabolic process;ATP synthesis coupled proton transport;biosynthetic process;cation transport;cellular biosynthetic process;cellular metabolic process;cellular nitrogen compound biosynthetic process;cellular nitrogen compound metabolic process;cellular process;energy coupled proton transport, down electrochemical gradient;establishment of localization;heterocycle bio…	cation transmembrane transporter activity;hydrogen ion transmembrane transporter activity;hydrogen ion transporting ATP synthase activity, rotational mechanism;inorganic cation transmembrane transporter activity;ion transmembrane transporter activity;monovalent inorganic cation transmembrane transporter activity;substrate-specific transmembrane transporter activity;substrate-specific transporter …	cell part;cytoplasmic part;intracellular organelle part;intracellular part;macromolecular complex;membrane part;mitochondrial membrane part;mitochondrial part;mitochondrial proton-transporting ATP synthase complex, coupling factor F(o);organelle part;protein complex;proton-transporting ATP synthase complex, coupling factor F(o);proton-transporting two-sector ATPase complex, proton-transporting do…	Alzheimer's disease;Huntington's disease;Oxidative phosphorylation;Parkinson's disease	1	2.6e-27	175.29	175.29	-0.53601	21704000
Q9DCX2;G3X9L6;B1ASE2	99;99;99	Q9DCX2	ATP synthase subunit d, mitochondrial	Atp5h;Gm10250;Atp5h	DKYTALVDQEEKEDVKSCAEFVSGSQLRIQE	NaN		#VALUE!	NaN	-0.0635515	#DIV/0!		2	___1	ATP biosynthetic process;ATP metabolic process;ATP synthesis coupled proton transport;biosynthetic process;cation transport;cellular biosynthetic process;cellular metabolic process;cellular nitrogen compound biosynthetic process;cellular nitrogen compound metabolic process;cellular process;energy coupled proton transport, down electrochemical gradient;establishment of localization;heterocycle bio…	cation transmembrane transporter activity;hydrogen ion transmembrane transporter activity;inorganic cation transmembrane transporter activity;ion transmembrane transporter activity;monovalent inorganic cation transmembrane transporter activity;substrate-specific transmembrane transporter activity;substrate-specific transporter activity;transmembrane transporter activity;transporter activity	cell part;cytoplasmic part;intracellular organelle part;intracellular part;macromolecular complex;membrane;membrane part;mitochondrial inner membrane;mitochondrial membrane;mitochondrial membrane part;mitochondrial part;mitochondrial proton-transporting ATP synthase complex;mitochondrial proton-transporting ATP synthase complex, coupling factor F(o);organelle inner membrane;organelle membrane;org…	Alzheimer's disease;Huntington's disease;Oxidative phosphorylation;Parkinson's disease	1	6.29e-05	75.463	75.463	0.79935	9680400
P97450	99	P97450	ATP synthase-coupling factor 6, mitochondrial	Atp5j	KGEMDTFPTFKFDDPKFEVIDKPQS______	NaN		-0.0232885	-0.148685	-0.125396	#DIV/0!		2	___2	ATP biosynthetic process;ATP metabolic process;ATP synthesis coupled proton transport;biosynthetic process;cation transport;cellular biosynthetic process;cellular metabolic process;cellular nitrogen compound biosynthetic process;cellular nitrogen compound metabolic process;cellular process;energy coupled proton transport, down electrochemical gradient;establishment of localization;heterocycle bio…	ATPase activity;catalytic activity;cation transmembrane transporter activity;hydrogen ion transmembrane transporter activity;hydrolase activity;hydrolase activity, acting on acid anhydrides;hydrolase activity, acting on acid anhydrides, in phosphorus-containing anhydrides;inorganic cation transmembrane transporter activity;ion transmembrane transporter activity;monovalent inorganic cation transme…	cell part;cytoplasmic part;intracellular organelle part;intracellular part;macromolecular complex;membrane part;mitochondrial membrane part;mitochondrial part;mitochondrial proton-transporting ATP synthase complex;mitochondrial proton-transporting ATP synthase complex, coupling factor F(o);organelle part;protein complex;proton-transporting ATP synthase complex;proton-transporting ATP synthase com…	Alzheimer's disease;Huntington's disease;Oxidative phosphorylation;Parkinson's disease	1	8.07e-18	156.72	79.652	-1.1678	11042000000
P97450	105	P97450	ATP synthase-coupling factor 6, mitochondrial	Atp5j	FPTFKFDDPKFEVIDKPQS____________	NaN		-0.0232885	-0.148685	-0.125396	#DIV/0!		2	___2	ATP biosynthetic process;ATP metabolic process;ATP synthesis coupled proton transport;biosynthetic process;cation transport;cellular biosynthetic process;cellular metabolic process;cellular nitrogen compound biosynthetic process;cellular nitrogen compound metabolic process;cellular process;energy coupled proton transport, down electrochemical gradient;establishment of localization;heterocycle bio…	ATPase activity;catalytic activity;cation transmembrane transporter activity;hydrogen ion transmembrane transporter activity;hydrolase activity;hydrolase activity, acting on acid anhydrides;hydrolase activity, acting on acid anhydrides, in phosphorus-containing anhydrides;inorganic cation transmembrane transporter activity;ion transmembrane transporter activity;monovalent inorganic cation transme…	cell part;cytoplasmic part;intracellular organelle part;intracellular part;macromolecular complex;membrane part;mitochondrial membrane part;mitochondrial part;mitochondrial proton-transporting ATP synthase complex;mitochondrial proton-transporting ATP synthase complex, coupling factor F(o);organelle part;protein complex;proton-transporting ATP synthase complex;proton-transporting ATP synthase com…	Alzheimer's disease;Huntington's disease;Oxidative phosphorylation;Parkinson's disease	1	6.23e-17	151.07	113.1	-0.21051	2544900000
Q9CPQ8	24	Q9CPQ8	ATP synthase subunit g, mitochondrial	Atp5l	AEKAPSMVAAAVTYSKPRLATFWHYAKVELV	NaN		-0.0843238	-0.0171598	0.0671641	#DIV/0!		3	___1	ATP biosynthetic process;ATP metabolic process;ATP synthesis coupled proton transport;biosynthetic process;cation transport;cellular biosynthetic process;cellular metabolic process;cellular nitrogen compound biosynthetic process;cellular nitrogen compound metabolic process;cellular process;energy coupled proton transport, down electrochemical gradient;establishment of localization;heterocycle bio…	cation transmembrane transporter activity;hydrogen ion transmembrane transporter activity;inorganic cation transmembrane transporter activity;ion transmembrane transporter activity;monovalent inorganic cation transmembrane transporter activity;substrate-specific transmembrane transporter activity;substrate-specific transporter activity;transmembrane transporter activity;transporter activity	cell part;cytoplasmic part;intracellular organelle part;intracellular part;macromolecular complex;membrane part;mitochondrial membrane part;mitochondrial part;mitochondrial proton-transporting ATP synthase complex;mitochondrial proton-transporting ATP synthase complex, coupling factor F(o);organelle part;protein complex;proton-transporting ATP synthase complex;proton-transporting ATP synthase com…	Oxidative phosphorylation	1	6.77e-09	101.97	101.97	-1.4363	17932000
Q9CPQ8;F2Z452	66;66	Q9CPQ8	ATP synthase subunit g, mitochondrial	Atp5l;Atp5l-ps1	QSVKKIIQSAKTGSFKHLTVKEAVLNGLVAT	NaN		-0.0843238	-0.0171598	0.0671641	#DIV/0!		2	___1	ATP biosynthetic process;ATP metabolic process;ATP synthesis coupled proton transport;biosynthetic process;cation transport;cellular biosynthetic process;cellular metabolic process;cellular nitrogen compound biosynthetic process;cellular nitrogen compound metabolic process;cellular process;energy coupled proton transport, down electrochemical gradient;establishment of localization;heterocycle bio…	cation transmembrane transporter activity;hydrogen ion transmembrane transporter activity;inorganic cation transmembrane transporter activity;ion transmembrane transporter activity;monovalent inorganic cation transmembrane transporter activity;substrate-specific transmembrane transporter activity;substrate-specific transporter activity;transmembrane transporter activity;transporter activity	cell part;cytoplasmic part;intracellular organelle part;intracellular part;macromolecular complex;membrane part;mitochondrial membrane part;mitochondrial part;mitochondrial proton-transporting ATP synthase complex;mitochondrial proton-transporting ATP synthase complex, coupling factor F(o);organelle part;protein complex;proton-transporting ATP synthase complex;proton-transporting ATP synthase com…	Oxidative phosphorylation	1	0.000786534	76.522	76.522	0.74932	3177200
Q9DB20;D3Z4J0;F6XVM5	54;54;51	Q9DB20	ATP synthase subunit O, mitochondrial	Atp5o;Gm5436;Atp5o	GRYATALYSAASKEKKLDQVEKELLRVGQLL	NaN		#VALUE!	NaN	0.0710814	#DIV/0!		2	___2	ATP biosynthetic process;ATP metabolic process;ATP synthesis coupled proton transport;biosynthetic process;cation transport;cellular biosynthetic process;cellular metabolic process;cellular nitrogen compound biosynthetic process;cellular nitrogen compound metabolic process;cellular process;energy coupled proton transport, down electrochemical gradient;establishment of localization;establishment o…	binding;cation transmembrane transporter activity;drug binding;hydrogen ion transmembrane transporter activity;hydrogen ion transporting ATP synthase activity, rotational mechanism;inorganic cation transmembrane transporter activity;ion transmembrane transporter activity;lipid binding;monovalent inorganic cation transmembrane transporter activity;steroid binding;substrate-specific transmembrane t…	cell part;cytoplasmic part;intracellular membrane-bounded organelle;intracellular organelle;intracellular organelle part;intracellular part;macromolecular complex;membrane;membrane part;membrane-bounded organelle;mitochondrial membrane part;mitochondrial part;mitochondrial proton-transporting ATP synthase complex;mitochondrial proton-transporting ATP synthase complex, coupling factor F(o);mitocho…	Alzheimer's disease;Huntington's disease;Oxidative phosphorylation;Parkinson's disease	1	0.000617282	104.24	104.24	1.5021	51928000
Q9DB20;D3Z4J0;F6XVM5	60;60;57	Q9DB20	ATP synthase subunit O, mitochondrial	Atp5o;Gm5436;Atp5o	LYSAASKEKKLDQVEKELLRVGQLLKDPKVS	NaN		#VALUE!	NaN	0.0710814	#DIV/0!		2	___2	ATP biosynthetic process;ATP metabolic process;ATP synthesis coupled proton transport;biosynthetic process;cation transport;cellular biosynthetic process;cellular metabolic process;cellular nitrogen compound biosynthetic process;cellular nitrogen compound metabolic process;cellular process;energy coupled proton transport, down electrochemical gradient;establishment of localization;establishment o…	binding;cation transmembrane transporter activity;drug binding;hydrogen ion transmembrane transporter activity;hydrogen ion transporting ATP synthase activity, rotational mechanism;inorganic cation transmembrane transporter activity;ion transmembrane transporter activity;lipid binding;monovalent inorganic cation transmembrane transporter activity;steroid binding;substrate-specific transmembrane t…	cell part;cytoplasmic part;intracellular membrane-bounded organelle;intracellular organelle;intracellular organelle part;intracellular part;macromolecular complex;membrane;membrane part;membrane-bounded organelle;mitochondrial membrane part;mitochondrial part;mitochondrial proton-transporting ATP synthase complex;mitochondrial proton-transporting ATP synthase complex, coupling factor F(o);mitocho…	Alzheimer's disease;Huntington's disease;Oxidative phosphorylation;Parkinson's disease	1	7.9e-33	197.07	109.24	1.4439	5791900000
P50516;P50516-2	467;467	P50516	V-type proton ATPase catalytic subunit A	Atp6v1a	ISYSKYMRALDEYYDKHFTEFVPLRTKAKEI	NaN		0.278172	0.499966	0.221794	#DIV/0!		3	___1	ATP hydrolysis coupled proton transport;cation transport;cellular process;energy coupled proton transport, against electrochemical gradient;establishment of localization;hydrogen transport;ion transmembrane transport;ion transport;monovalent inorganic cation transport;proton transport;transmembrane transport;transport	active transmembrane transporter activity;adenyl nucleotide binding;adenyl ribonucleotide binding;ATP binding;ATPase activity;ATPase activity, coupled;ATPase activity, coupled to movement of substances;ATPase activity, coupled to transmembrane movement of ions;ATPase activity, coupled to transmembrane movement of substances;binding;catalytic activity;cation transmembrane transporter activity;cati…	apical plasma membrane;cell part;cell projection;cytoplasmic part;cytosol;intracellular membrane-bounded organelle;intracellular organelle;intracellular part;macromolecular complex;membrane part;membrane-bounded organelle;microvillus;mitochondrion;organelle;plasma membrane part;protein complex;proton-transporting two-sector ATPase complex, catalytic domain;proton-transporting V-type ATPase, V1 do…	Collecting duct acid secretion;Epithelial cell signaling in Helicobacter pylori infection;Oxidative phosphorylation;Phagosome;Rheumatoid arthritis;Vibrio cholerae infection	1	7.32e-06	112.8	112.8	2.3171	7007600
Q9JLZ3;F6RT60;F6R307	186;113;147	Q9JLZ3	Methylglutaconyl-CoA hydratase, mitochondrial	Auh;Auh;Auh	IRVAASSAKMGLVETKLAIIPGGGGTQRLPR	NaN		0.272665	0.0210079	-0.251657	#DIV/0!		3	___1	amine catabolic process;amine metabolic process;branched chain family amino acid catabolic process;branched chain family amino acid metabolic process;carboxylic acid catabolic process;carboxylic acid metabolic process;catabolic process;cellular amine metabolic process;cellular amino acid catabolic process;cellular amino acid metabolic process;cellular catabolic process;cellular ketone metabolic p…	binding;carbon-oxygen lyase activity;catalytic activity;enoyl-CoA hydratase activity;hydro-lyase activity;lyase activity;methylglutaconyl-CoA hydratase activity;mRNA 3'-UTR binding;mRNA binding;nucleic acid binding;RNA binding	cell part;cytoplasmic part;intracellular membrane-bounded organelle;intracellular organelle;intracellular part;membrane-bounded organelle;mitochondrion;organelle	Valine, leucine and isoleucine degradation	1	8.97e-22	115.57	101.93	-0.47119	465910000
Q9JLZ3;F6RT60;F6R307	186;113;147	Q9JLZ3	Methylglutaconyl-CoA hydratase, mitochondrial	Auh;Auh;Auh	IRVAASSAKMGLVETKLAIIPGGGGTQRLPR	NaN		0.272665	0.0210079	-0.251657	#DIV/0!		3	___2	amine catabolic process;amine metabolic process;branched chain family amino acid catabolic process;branched chain family amino acid metabolic process;carboxylic acid catabolic process;carboxylic acid metabolic process;catabolic process;cellular amine metabolic process;cellular amino acid catabolic process;cellular amino acid metabolic process;cellular catabolic process;cellular ketone metabolic p…	binding;carbon-oxygen lyase activity;catalytic activity;enoyl-CoA hydratase activity;hydro-lyase activity;lyase activity;methylglutaconyl-CoA hydratase activity;mRNA 3'-UTR binding;mRNA binding;nucleic acid binding;RNA binding	cell part;cytoplasmic part;intracellular membrane-bounded organelle;intracellular organelle;intracellular part;membrane-bounded organelle;mitochondrion;organelle	Valine, leucine and isoleucine degradation	1	8.97e-22	115.57	101.93	-0.47119	465910000
Q9JLZ3;F6RT60;F6R307	179;106;140	Q9JLZ3	Methylglutaconyl-CoA hydratase, mitochondrial	Auh;Auh;Auh	ELALACDIRVAASSAKMGLVETKLAIIPGGG	NaN		0.272665	0.0210079	-0.251657	#DIV/0!		3	___2	amine catabolic process;amine metabolic process;branched chain family amino acid catabolic process;branched chain family amino acid metabolic process;carboxylic acid catabolic process;carboxylic acid metabolic process;catabolic process;cellular amine metabolic process;cellular amino acid catabolic process;cellular amino acid metabolic process;cellular catabolic process;cellular ketone metabolic p…	binding;carbon-oxygen lyase activity;catalytic activity;enoyl-CoA hydratase activity;hydro-lyase activity;lyase activity;methylglutaconyl-CoA hydratase activity;mRNA 3'-UTR binding;mRNA binding;nucleic acid binding;RNA binding	cell part;cytoplasmic part;intracellular membrane-bounded organelle;intracellular organelle;intracellular part;membrane-bounded organelle;mitochondrion;organelle	Valine, leucine and isoleucine degradation	1	8.97e-22	109.23	101.93	-0.47119	343450000
Q9JLZ3;F6RT60;F6R307;Q9JLZ3-3;E9QMT1;Q9JLZ3-2;E9Q6L3	88;15;49;88;88;88;88	Q9JLZ3	Methylglutaconyl-CoA hydratase, mitochondrial	Auh;Auh;Auh;Auh;Auh	YGKNALSKNLLKMLSKAVDALKSDKKVRTII	NaN		0.272665	0.0210079	-0.251657	#DIV/0!		2	___1	amine catabolic process;amine metabolic process;branched chain family amino acid catabolic process;branched chain family amino acid metabolic process;carboxylic acid catabolic process;carboxylic acid metabolic process;catabolic process;cellular amine metabolic process;cellular amino acid catabolic process;cellular amino acid metabolic process;cellular catabolic process;cellular ketone metabolic p…	binding;carbon-oxygen lyase activity;catalytic activity;enoyl-CoA hydratase activity;hydro-lyase activity;lyase activity;methylglutaconyl-CoA hydratase activity;mRNA 3'-UTR binding;mRNA binding;nucleic acid binding;RNA binding	cell part;cytoplasmic part;intracellular membrane-bounded organelle;intracellular organelle;intracellular part;membrane-bounded organelle;mitochondrion;organelle	Valine, leucine and isoleucine degradation	1	0.000304582	102.53	98.898	-0.44432	285690000
Q91X34	406	Q91X34	Bile acid-CoA:amino acid N-acyltransferase	Baat	IPHAAAQEHSWKEIQKFLKQHLLPDLSSQL_	NaN		0.107424	-0.665523	-0.772947	#DIV/0!		2	___1	acyl-CoA metabolic process;amine metabolic process;anatomical structure development;anatomical structure morphogenesis;bile acid biosynthetic process;bile acid conjugation;bile acid metabolic process;biosynthetic process;carboxylic acid biosynthetic process;carboxylic acid metabolic process;cellular amine metabolic process;cellular amino acid metabolic process;cellular biosynthetic process;cellul…	acyl-CoA thioesterase activity;carboxylesterase activity;carboxylic ester hydrolase activity;catalytic activity;CoA hydrolase activity;glycine N-choloyltransferase activity;hydrolase activity;hydrolase activity, acting on ester bonds;N-acyltransferase activity;palmitoyl-CoA hydrolase activity;thiolester hydrolase activity;transferase activity;transferase activity, transferring acyl groups;transfe…	cell part;cytoplasmic part;cytosol;intracellular membrane-bounded organelle;intracellular organelle;intracellular part;membrane-bounded organelle;microbody;organelle;peroxisome	Bile secretion;Biosynthesis of unsaturated fatty acids;Peroxisome;Primary bile acid biosynthesis;Taurine and hypotaurine metabolism	1	0.0475368	104.45	104.45	0.1585	109160000
Q6P3A8;Q6P3A8-2	239;171	Q6P3A8	2-oxoisovalerate dehydrogenase subunit beta, mitochondrial	Bckdhb	LSCIEDKNPCIFFEPKILYRAAVEQVPVEPY	NaN		0.438665	-0.0511804	-0.489845	#DIV/0!		2	___1	amine catabolic process;amine metabolic process;branched chain family amino acid catabolic process;branched chain family amino acid metabolic process;carboxylic acid catabolic process;carboxylic acid metabolic process;catabolic process;cellular amine metabolic process;cellular amino acid catabolic process;cellular amino acid metabolic process;cellular catabolic process;cellular ketone metabolic p…	3-methyl-2-oxobutanoate dehydrogenase (2-methylpropanoyl-transferring) activity;alpha-ketoacid dehydrogenase activity;catalytic activity;oxidoreductase activity;oxidoreductase activity, acting on the aldehyde or oxo group of donors;oxidoreductase activity, acting on the aldehyde or oxo group of donors, disulfide as acceptor	cell part;cytoplasmic part;dihydrolipoyl dehydrogenase complex;intracellular organelle part;intracellular part;macromolecular complex;membrane;mitochondrial alpha-ketoglutarate dehydrogenase complex;mitochondrial inner membrane;mitochondrial membrane;mitochondrial part;mitochondrial tricarboxylic acid cycle enzyme complex;organelle inner membrane;organelle membrane;organelle part;protein complex;…	Valine, leucine and isoleucine degradation	1	0.000179227	93.823	93.823	-0.74231	16389000
O55028;D3Z7R0	184;184	O55028	[3-methyl-2-oxobutanoate dehydrogenase [lipoamide]] kinase, mitochondrial	Bckdk;Bckdk	LAEGLRESRKHIQDEKLVRYFLDKTLTSRLG	NaN		#VALUE!	-0.0555227	NaN	#DIV/0!		2	___1	amine catabolic process;amine metabolic process;branched chain family amino acid catabolic process;branched chain family amino acid metabolic process;carboxylic acid catabolic process;carboxylic acid metabolic process;catabolic process;cellular amine metabolic process;cellular amino acid catabolic process;cellular amino acid metabolic process;cellular catabolic process;cellular ketone metabolic p…	[3-methyl-2-oxobutanoate dehydrogenase (acetyl-transferring)] kinase activity;adenyl nucleotide binding;adenyl ribonucleotide binding;ATP binding;binding;catalytic activity;kinase activity;nucleotide binding;phosphotransferase activity, alcohol group as acceptor;protein kinase activity;protein serine/threonine kinase activity;purine nucleotide binding;purine ribonucleoside triphosphate binding;pu…	cell part;cytoplasmic part;dihydrolipoyl dehydrogenase complex;intracellular membrane-bounded organelle;intracellular organelle;intracellular organelle part;intracellular part;macromolecular complex;membrane-bounded organelle;mitochondrial alpha-ketoglutarate dehydrogenase complex;mitochondrial part;mitochondrial tricarboxylic acid cycle enzyme complex;mitochondrion;organelle;organelle part;prote…		1	0.00170328	90.306	90.306	0.6567	31438000
Q80XN0	275	Q80XN0	D-beta-hydroxybutyrate dehydrogenase, mitochondrial	Bdh1	MWDDLPEVVRKDYGRKYFDEKIAKMETYCNS	NaN		0.331917	0.882857	0.55094	#DIV/0!		3	___1	adipose tissue development;anatomical structure development;brain development;developmental process;liver development;organ development;response to cadmium ion;response to chemical stimulus;response to corticosteroid stimulus;response to corticosterone stimulus;response to drug;response to endogenous stimulus;response to estradiol stimulus;response to estrogen stimulus;response to ethanol;respons…	3-hydroxybutyrate dehydrogenase activity;binding;catalytic activity;lipid binding;oxidoreductase activity;oxidoreductase activity, acting on CH-OH group of donors;oxidoreductase activity, acting on the CH-OH group of donors, NAD or NADP as acceptor;phospholipid binding	cell part;cytoplasmic part;intracellular membrane-bounded organelle;intracellular organelle;intracellular organelle lumen;intracellular organelle part;intracellular part;membrane;membrane-bounded organelle;membrane-enclosed lumen;mitochondrial inner membrane;mitochondrial matrix;mitochondrial membrane;mitochondrial part;nucleus;organelle;organelle inner membrane;organelle lumen;organelle membrane…	Butanoate metabolism;Synthesis and degradation of ketone bodies	1	0.000662282	77.062	77.062	0.6399	22200000
Q80XN0;D3Z2Y8	122;158	Q80XN0	D-beta-hydroxybutyrate dehydrogenase, mitochondrial	Bdh1;Bdh1	LRTIQLNVCNSEEVEKAVETIRSGLKDPEKG	NaN		0.331917	0.882857	0.55094	#DIV/0!		3	___1	adipose tissue development;anatomical structure development;brain development;developmental process;liver development;metabolic process;organ development;oxidation-reduction process;response to cadmium ion;response to chemical stimulus;response to corticosteroid stimulus;response to corticosterone stimulus;response to drug;response to endogenous stimulus;response to estradiol stimulus;response to…	3-hydroxybutyrate dehydrogenase activity;binding;catalytic activity;lipid binding;oxidoreductase activity;oxidoreductase activity, acting on CH-OH group of donors;oxidoreductase activity, acting on the CH-OH group of donors, NAD or NADP as acceptor;phospholipid binding	cell part;cytoplasmic part;intracellular membrane-bounded organelle;intracellular organelle;intracellular organelle lumen;intracellular organelle part;intracellular part;membrane;membrane-bounded organelle;membrane-enclosed lumen;mitochondrial inner membrane;mitochondrial matrix;mitochondrial membrane;mitochondrial part;nucleus;organelle;organelle inner membrane;organelle lumen;organelle membrane…	Butanoate metabolism;Synthesis and degradation of ketone bodies	1	0.000188722	81.665	81.665	0.67108	6830100
O35490;A2ALP9	229;229	O35490	Betaine--homocysteine S-methyltransferase 1	Bhmt;Bhmt-ps1	GVNCHFDPSVSLQTVKLMKEGLEAARLKAYL	NaN		#VALUE!	NaN	-1.51428	#DIV/0!		3	___1	amine biosynthetic process;amine metabolic process;aspartate family amino acid biosynthetic process;aspartate family amino acid metabolic process;betaine catabolic process;betaine metabolic process;biosynthetic process;carboxylic acid biosynthetic process;carboxylic acid metabolic process;catabolic process;cellular amine metabolic process;cellular amino acid biosynthetic process;cellular amino ac…	betaine-homocysteine S-methyltransferase activity;binding;catalytic activity;cation binding;homocysteine S-methyltransferase activity;ion binding;metal ion binding;methyltransferase activity;S-adenosylmethionine-dependent methyltransferase activity;S-methyltransferase activity;transferase activity;transferase activity, transferring one-carbon groups;transition metal ion binding;zinc ion binding	cell part;cytoplasm;intracellular part	Cysteine and methionine metabolism;Glycine, serine and threonine metabolism	1	2.27e-19	112.86	112.86	0.99721	37290000
O35490;A2ALP9	232;232	O35490	Betaine--homocysteine S-methyltransferase 1	Bhmt;Bhmt-ps1	CHFDPSVSLQTVKLMKEGLEAARLKAYLMSQ	NaN		#VALUE!	NaN	-1.51428	#DIV/0!		3	___1	amine biosynthetic process;amine metabolic process;aspartate family amino acid biosynthetic process;aspartate family amino acid metabolic process;betaine catabolic process;betaine metabolic process;biosynthetic process;carboxylic acid biosynthetic process;carboxylic acid metabolic process;catabolic process;cellular amine metabolic process;cellular amino acid biosynthetic process;cellular amino ac…	betaine-homocysteine S-methyltransferase activity;binding;catalytic activity;cation binding;homocysteine S-methyltransferase activity;ion binding;metal ion binding;methyltransferase activity;S-adenosylmethionine-dependent methyltransferase activity;S-methyltransferase activity;transferase activity;transferase activity, transferring one-carbon groups;transition metal ion binding;zinc ion binding	cell part;cytoplasm;intracellular part	Cysteine and methionine metabolism;Glycine, serine and threonine metabolism	1	0.000254044	94.122	94.122	-0.57659	65778000
O35490;A2ALP9	82;82	O35490	Betaine--homocysteine S-methyltransferase 1	Bhmt;Bhmt-ps1	GSNVMQTFTFYASEDKLENRGNYVAEKISGQ	NaN		#VALUE!	NaN	-1.51428	#DIV/0!		3	___1	amine biosynthetic process;amine metabolic process;aspartate family amino acid biosynthetic process;aspartate family amino acid metabolic process;betaine catabolic process;betaine metabolic process;biosynthetic process;carboxylic acid biosynthetic process;carboxylic acid metabolic process;catabolic process;cellular amine metabolic process;cellular amino acid biosynthetic process;cellular amino ac…	betaine-homocysteine S-methyltransferase activity;binding;catalytic activity;cation binding;homocysteine S-methyltransferase activity;ion binding;metal ion binding;methyltransferase activity;S-adenosylmethionine-dependent methyltransferase activity;S-methyltransferase activity;transferase activity;transferase activity, transferring one-carbon groups;transition metal ion binding;zinc ion binding	cell part;cytoplasm;intracellular part	Cysteine and methionine metabolism;Glycine, serine and threonine metabolism	1	8.63e-19	126.02	126.02	0.75424	13719000
O35490;A2ALP9	93;93	O35490	Betaine--homocysteine S-methyltransferase 1	Bhmt;Bhmt-ps1	ASEDKLENRGNYVAEKISGQKVNEAACDIAR	NaN		#VALUE!	NaN	-1.51428	#DIV/0!		3	___1	amine biosynthetic process;amine metabolic process;aspartate family amino acid biosynthetic process;aspartate family amino acid metabolic process;betaine catabolic process;betaine metabolic process;biosynthetic process;carboxylic acid biosynthetic process;carboxylic acid metabolic process;catabolic process;cellular amine metabolic process;cellular amino acid biosynthetic process;cellular amino ac…	betaine-homocysteine S-methyltransferase activity;binding;catalytic activity;cation binding;homocysteine S-methyltransferase activity;ion binding;metal ion binding;methyltransferase activity;S-adenosylmethionine-dependent methyltransferase activity;S-methyltransferase activity;transferase activity;transferase activity, transferring one-carbon groups;transition metal ion binding;zinc ion binding	cell part;cytoplasm;intracellular part	Cysteine and methionine metabolism;Glycine, serine and threonine metabolism	1	1.74e-10	97.291	92.8	-0.28445	63068000
Q8R164	243	Q8R164	Valacyclovir hydrolase	Bphl	LLPLVQCPTLIVHGEKDPLVPRFHADFLLQH	NaN		0.327374	0.208994	-0.11838	#DIV/0!		3	___1		catalytic activity;hydrolase activity	cell part;cytoplasmic part;intracellular membrane-bounded organelle;intracellular organelle;intracellular part;membrane-bounded organelle;mitochondrion;organelle		1	5.47e-22	119.79	82.593	0.55389	42044000
Q8R164;E9PXG8	119;127	Q8R164	Valacyclovir hydrolase	Bphl;Bphl	PPDRDFPRDFFERDAKDAVDLMKALQFKQVS	NaN		0.327374	0.208994	-0.11838	#DIV/0!		3	___1		catalytic activity;hydrolase activity	cell part;cytoplasmic part;intracellular membrane-bounded organelle;intracellular organelle;intracellular part;membrane-bounded organelle;mitochondrion;organelle		1	6.13e-06	88.133	88.133	-0.69489	15510000
P16015	39	P16015	Carbonic anhydrase 3	Ca3	KGDNQSPIELHTKDIKHDPSLQPWSASYDPG	NaN		-0.605169	-0.359525	0.245644	#DIV/0!		3	___1	cellular metabolic process;cellular process;metabolic process;one-carbon metabolic process;response to chemical stimulus;response to oxidative stress;response to stimulus;response to stress;small molecule metabolic process	binding;carbonate dehydratase activity;carbon-oxygen lyase activity;catalytic activity;cation binding;hydro-lyase activity;ion binding;lyase activity;metal ion binding;nickel ion binding;transition metal ion binding;zinc ion binding	cell part;cytoplasm;intracellular part	Nitrogen metabolism	1	2.74e-09	95.195	95.195	-0.34392	31973000
P16015	224	P16015	Carbonic anhydrase 3	Ca3	LLLKEPMTVSSDQMAKLRSLFSSAENEPPVP	NaN		-0.605169	-0.359525	0.245644	#DIV/0!		2	___1	cellular metabolic process;cellular process;metabolic process;one-carbon metabolic process;response to chemical stimulus;response to oxidative stress;response to stimulus;response to stress;small molecule metabolic process	binding;carbonate dehydratase activity;carbon-oxygen lyase activity;catalytic activity;cation binding;hydro-lyase activity;ion binding;lyase activity;metal ion binding;nickel ion binding;transition metal ion binding;zinc ion binding	cell part;cytoplasm;intracellular part	Nitrogen metabolism	1	0.00721382	75.764	75.764	0.76021	21116000
P16015	36	P16015	Carbonic anhydrase 3	Ca3	PIAKGDNQSPIELHTKDIKHDPSLQPWSASY	NaN		-0.605169	-0.359525	0.245644	#DIV/0!		3	___1	cellular metabolic process;cellular process;metabolic process;one-carbon metabolic process;response to chemical stimulus;response to oxidative stress;response to stimulus;response to stress;small molecule metabolic process	binding;carbonate dehydratase activity;carbon-oxygen lyase activity;catalytic activity;cation binding;hydro-lyase activity;ion binding;lyase activity;metal ion binding;nickel ion binding;transition metal ion binding;zinc ion binding	cell part;cytoplasm;intracellular part	Nitrogen metabolism	1	1.27e-13	127.3	77.562	-0.9676	96591000
P16015	135	P16015	Carbonic anhydrase 3	Ca3	LVHWNPKYNTFGEALKQPDGIAVVGIFLKIG	NaN		-0.605169	-0.359525	0.245644	#DIV/0!		3	___1	cellular metabolic process;cellular process;metabolic process;one-carbon metabolic process;response to chemical stimulus;response to oxidative stress;response to stimulus;response to stress;small molecule metabolic process	binding;carbonate dehydratase activity;carbon-oxygen lyase activity;catalytic activity;cation binding;hydro-lyase activity;ion binding;lyase activity;metal ion binding;nickel ion binding;transition metal ion binding;zinc ion binding	cell part;cytoplasm;intracellular part	Nitrogen metabolism	1	2.41e-39	140.63	140.63	-0.48314	98105000
P23589	179	P23589	Carbonic anhydrase 5A, mitochondrial	Ca5a	ASVGENGLAVIGVFLKLGAHHQALQKLVDVL	NaN		0.335278	-0.14531	-0.480588	#DIV/0!		4	___1	alcohol biosynthetic process;alcohol metabolic process;biosynthetic process;carbohydrate biosynthetic process;carbohydrate metabolic process;cellular biosynthetic process;cellular carbohydrate biosynthetic process;cellular carbohydrate metabolic process;cellular metabolic process;cellular process;gluconeogenesis;glucose metabolic process;hexose biosynthetic process;hexose metabolic process;metabo…	binding;carbonate dehydratase activity;carbon-oxygen lyase activity;catalytic activity;cation binding;hydro-lyase activity;ion binding;lyase activity;metal ion binding;transition metal ion binding;zinc ion binding	cell part;cytoplasmic part;intracellular membrane-bounded organelle;intracellular organelle;intracellular part;membrane-bounded organelle;mitochondrion;organelle	Nitrogen metabolism	1	9.04e-15	93.966	93.966	1.0676	58377000
Q3UKW2;P62204	70;22	Q3UKW2	Calmodulin	Calm1;Calm1	EEQIAEFKEAFSLFDKDGDGTITTKELGTVM	NaN		#VALUE!	NaN	-0.0485659	#DIV/0!		2	___1	biological regulation;regulation of biological process;regulation of cell division;regulation of cellular process;regulation of cytokinesis;response to amine stimulus;response to amphetamine;response to calcium ion;response to chemical stimulus;response to corticosteroid stimulus;response to corticosterone stimulus;response to endogenous stimulus;response to glucocorticoid stimulus;response to ho…	binding;calcium ion binding;cation binding;ion binding;metal ion binding	cell part;centrosome;cytoplasmic part;cytoskeletal part;cytosol;intracellular non-membrane-bounded organelle;intracellular organelle;intracellular organelle part;intracellular part;macromolecular complex;microtubule;microtubule organizing center;non-membrane-bounded organelle;organelle;organelle part;protein complex;spindle microtubule;spindle pole	Alzheimer's disease;Calcium signaling pathway;Gastric acid secretion;Glioma;GnRH signaling pathway;Insulin signaling pathway;ko05152;Long-term potentiation;Melanogenesis;Neurotrophin signaling pathway;Olfactory transduction;Oocyte meiosis;Phosphatidylinositol signaling system;Phototransduction;Phototransduction - fly;Plant-pathogen interaction;Salivary secretion;Vascular smooth muscle contraction	1	1.44e-08	119.23	119.23	-1.5049	18903000
P14211	62	P14211	Calreticulin	Calr	GKFVLSSGKFYGDLEKDKGLQTSQDARFYAL	NaN		-0.471838	-0.121253	0.350586	#DIV/0!		2	___1	actin cytoskeleton organization;actin filament-based process;aging;biological regulation;cardiac cell differentiation;cardiac muscle cell differentiation;cell aging;cell cycle arrest;cell cycle process;cell differentiation;cellular component assembly;cellular component assembly at cellular level;cellular component organization;cellular component organization at cellular level;cellular component o…	binding;calcium ion binding;carbohydrate binding;cation binding;hormone binding;ion binding;iron ion binding;metal ion binding;mRNA binding;nucleic acid binding;peptide binding;RNA binding;transition metal ion binding	acrosomal vesicle;cell part;cytoplasmic membrane-bounded vesicle;cytoplasmic part;cytoplasmic vesicle;cytosol;endocytic vesicle;endoplasmic reticulum lumen;endoplasmic reticulum part;external side of plasma membrane;extracellular matrix;extracellular region part;extracellular space;Golgi apparatus;intracellular membrane-bounded organelle;intracellular organelle;intracellular organelle lumen;intra…	Antigen processing and presentation;Chagas disease (American trypanosomiasis);Phagosome;Protein processing in endoplasmic reticulum	1	0.00475862	76.228	76.228	0.76477	40915000
P14211	238	P14211	Calreticulin	Calr	AKIDDPTDSKPEDWDKPEHIPDPDAKKPEDW	NaN		-0.471838	-0.121253	0.350586	#DIV/0!		4	___1	actin cytoskeleton organization;actin filament-based process;aging;biological regulation;cardiac cell differentiation;cardiac muscle cell differentiation;cell aging;cell cycle arrest;cell cycle process;cell differentiation;cellular component assembly;cellular component assembly at cellular level;cellular component organization;cellular component organization at cellular level;cellular component o…	binding;calcium ion binding;carbohydrate binding;cation binding;hormone binding;ion binding;iron ion binding;metal ion binding;mRNA binding;nucleic acid binding;peptide binding;RNA binding;transition metal ion binding	acrosomal vesicle;cell part;cytoplasmic membrane-bounded vesicle;cytoplasmic part;cytoplasmic vesicle;cytosol;endocytic vesicle;endoplasmic reticulum lumen;endoplasmic reticulum part;external side of plasma membrane;extracellular matrix;extracellular region part;extracellular space;Golgi apparatus;intracellular membrane-bounded organelle;intracellular organelle;intracellular organelle lumen;intra…	Antigen processing and presentation;Chagas disease (American trypanosomiasis);Phagosome;Protein processing in endoplasmic reticulum	0.999959	7.67e-16	110.14	110.14	-0.34324	31124000
P47754;D6RCW7	86;86	P47754	F-actin-capping protein subunit alpha-2	Capza2;Capza2	EDQVLITEHGDLGNGKFLDPKNRICFKFDHL	NaN		0.0358783	0.104559	0.0686806	#DIV/0!		3	___1	actin cytoskeleton organization;actin filament capping;actin filament-based process;biological regulation;cellular component organization;cellular component organization at cellular level;cellular component organization or biogenesis;cellular component organization or biogenesis at cellular level;cellular process;cytoskeleton organization;negative regulation of actin filament depolymerization;neg…		cell cortex part;cell part;cortical cytoskeleton;cytoplasmic part;cytoskeletal part;cytoskeleton;F-actin capping protein complex;intracellular non-membrane-bounded organelle;intracellular organelle;intracellular organelle part;intracellular part;macromolecular complex;membrane;non-membrane-bounded organelle;organelle;organelle part;protein complex		1	7.95e-14	102.05	102.05	-1.4206	113080000
P24270	430	P24270	Catalase	Cat	QRSALEHSVQCAVDVKRFNSANEDNVTQVRT	NaN		-0.00552306	-0.210552	-0.205029	#DIV/0!		3	___1	acylglycerol metabolic process;aerobic respiration;alcohol metabolic process;anatomical structure development;biological regulation;catabolic process;cellular catabolic process;cellular component assembly;cellular component organization;cellular component organization or biogenesis;cellular lipid metabolic process;cellular metabolic process;cellular process;cellular respiration;cellular response …	aminoacylase activity;antioxidant activity;binding;catalase activity;catalytic activity;cation binding;coenzyme binding;cofactor binding;heme binding;hydrolase activity;hydrolase activity, acting on carbon-nitrogen (but not peptide) bonds;hydrolase activity, acting on carbon-nitrogen (but not peptide) bonds, in linear amides;ion binding;iron ion binding;metal ion binding;NADP binding;nucleotide b…	cell part;cytoplasmic part;cytosol;endoplasmic reticulum;Golgi apparatus;intracellular membrane-bounded organelle;intracellular organelle;intracellular organelle part;intracellular part;lysosome;lytic vacuole;membrane;membrane-bounded organelle;membrane-enclosed lumen;microbody;microbody membrane;microbody part;mitochondrial intermembrane space;mitochondrial part;mitochondrion;organelle;organelle…	Amyotrophic lateral sclerosis (ALS);Methane metabolism;Peroxisome;Tryptophan metabolism	1	2.71e-05	85.734	85.734	-0.2235	15450000
Q91VT4	72	Q91VT4	Carbonyl reductase family member 4	Cbr4	VAKEQDVQSTFQEMEKHLGPVNFLVNAAGIN	NaN		0.316012	-0.200554	-0.516566	#DIV/0!		3	___1	biosynthetic process;carboxylic acid biosynthetic process;carboxylic acid metabolic process;cellular biosynthetic process;cellular component assembly;cellular component organization;cellular component organization or biogenesis;cellular ketone metabolic process;cellular lipid metabolic process;cellular metabolic process;cellular process;fatty acid biosynthetic process;fatty acid metabolic process…	binding;catalytic activity;coenzyme binding;cofactor binding;NAD(P)H dehydrogenase (quinone) activity;NADP binding;NADPH binding;NADPH dehydrogenase (quinone) activity;NADPH dehydrogenase activity;nucleotide binding;oxidoreductase activity;oxidoreductase activity, acting on NADH or NADPH;oxidoreductase activity, acting on NADH or NADPH, quinone or similar compound as acceptor;quinone binding	cell part;cytoplasmic part;intracellular organelle lumen;intracellular organelle part;intracellular part;membrane-enclosed lumen;mitochondrial matrix;mitochondrial part;organelle lumen;organelle part		1	0	347.54	347.54	0.61509	623810000
Q91WT9;Q91WT9-2	477;477	Q91WT9	Cystathionine beta-synthase	Cbs	SSLLAGKVRPSDEVCKVLYKQFKPIHLTDTL	NaN		0.530992	-0.421702	-0.952693	#DIV/0!		3	___1	amine biosynthetic process;amine catabolic process;amine metabolic process;anatomical structure development;anatomical structure morphogenesis;biological regulation;biosynthetic process;blood vessel remodeling;carboxylic acid biosynthetic process;carboxylic acid catabolic process;carboxylic acid metabolic process;cartilage development;cartilage development involved in endochondral bone morphogene…	amine binding;amino acid binding;binding;carbon-oxygen lyase activity;carboxylic acid binding;catalytic activity;cation binding;cofactor binding;cystathionine beta-synthase activity;heme binding;hydro-lyase activity;ion binding;iron ion binding;lyase activity;metal ion binding;modified amino acid binding;pyridoxal phosphate binding;tetrapyrrole binding;transition metal ion binding;vitamin B6 bind…	cell part;cytoplasmic part;cytosol;intracellular non-membrane-bounded organelle;intracellular organelle;intracellular organelle part;intracellular part;non-membrane-bounded organelle;nuclear part;nucleolus;organelle;organelle part	Cysteine and methionine metabolism;Glycine, serine and threonine metabolism	1	0.000256236	78.324	78.324	-0.90469	17817000
Q8BTY1;A2AQY9;A2AQY8	413;370;363	Q8BTY1	Kynurenine--oxoglutarate transaminase 1	Ccbl1;Ccbl1;Ccbl1	RFCFVKDKATLQAMDKRLCSWKGEPQA____	NaN		-0.612846	-0.0836965	0.529149	#DIV/0!		2	___1	amine metabolic process;biosynthetic process;carboxylic acid metabolic process;cellular amine metabolic process;cellular amino acid metabolic process;cellular ketone metabolic process;cellular metabolic process;cellular modified amino acid metabolic process;cellular nitrogen compound metabolic process;cellular process;kynurenine metabolic process;L-kynurenine catabolic process;L-kynurenine metabo…	binding;carbon-sulfur lyase activity;catalytic activity;cofactor binding;cysteine-S-conjugate beta-lyase activity;glutamine-phenylpyruvate transaminase activity;kynurenine-oxoglutarate transaminase activity;L-glutamine:pyruvate aminotransferase activity;L-phenylalanine aminotransferase activity;L-phenylalanine:pyruvate aminotransferase activity;lyase activity;pyridoxal phosphate binding;transamin…	cell part;cytoplasm;intracellular membrane-bounded organelle;intracellular organelle;intracellular part;membrane-bounded organelle;nucleus;organelle	Selenocompound metabolism;Tryptophan metabolism	1	0.00174435	86.898	86.898	0.23841	23776000
Q71RI9;Q71RI9-2	117;82	Q71RI9	Kynurenine--oxoglutarate transaminase 3	Ccbl2	FGHPALVKALSCLYGKIYQRQIDPNEEILVA	NaN		1.86844	1.58631	-0.282127	#DIV/0!		3	___1	2-oxoglutarate metabolic process;biosynthetic process;carboxylic acid metabolic process;cellular ketone metabolic process;cellular metabolic process;cellular process;dicarboxylic acid metabolic process;metabolic process;organic acid metabolic process;oxoacid metabolic process;small molecule metabolic process	binding;carbon-sulfur lyase activity;catalytic activity;cofactor binding;cysteine-S-conjugate beta-lyase activity;kynurenine-glyoxylate transaminase activity;kynurenine-oxoglutarate transaminase activity;lyase activity;pyridoxal phosphate binding;transaminase activity;transferase activity;transferase activity, transferring nitrogenous groups;vitamin B6 binding;vitamin binding	cell part;cytoplasmic part;intracellular membrane-bounded organelle;intracellular organelle;intracellular part;membrane-bounded organelle;mitochondrion;organelle	Selenocompound metabolism;Tryptophan metabolism	1	1.52e-08	142.08	115.29	-1.0901	595070000
Q71RI9;Q71RI9-2	204;169	Q71RI9	Kynurenine--oxoglutarate transaminase 3	Ccbl2	WTSSDWTFDPRELESKFSSKTKAIILNTPHN	NaN		1.86844	1.58631	-0.282127	#DIV/0!		2	___1	2-oxoglutarate metabolic process;biosynthetic process;carboxylic acid metabolic process;cellular ketone metabolic process;cellular metabolic process;cellular process;dicarboxylic acid metabolic process;metabolic process;organic acid metabolic process;oxoacid metabolic process;small molecule metabolic process	binding;carbon-sulfur lyase activity;catalytic activity;cofactor binding;cysteine-S-conjugate beta-lyase activity;kynurenine-glyoxylate transaminase activity;kynurenine-oxoglutarate transaminase activity;lyase activity;pyridoxal phosphate binding;transaminase activity;transferase activity;transferase activity, transferring nitrogenous groups;vitamin B6 binding;vitamin binding	cell part;cytoplasmic part;intracellular membrane-bounded organelle;intracellular organelle;intracellular part;membrane-bounded organelle;mitochondrion;organelle	Selenocompound metabolism;Tryptophan metabolism	1	0.00133095	94.692	86.18	-0.85943	162510000
Q71RI9;Q71RI9-2	109;74	Q71RI9	Kynurenine--oxoglutarate transaminase 3	Ccbl2	NMNQYTRGFGHPALVKALSCLYGKIYQRQID	NaN		1.86844	1.58631	-0.282127	#DIV/0!		3	___1	2-oxoglutarate metabolic process;biosynthetic process;carboxylic acid metabolic process;cellular ketone metabolic process;cellular metabolic process;cellular process;dicarboxylic acid metabolic process;metabolic process;organic acid metabolic process;oxoacid metabolic process;small molecule metabolic process	binding;carbon-sulfur lyase activity;catalytic activity;cofactor binding;cysteine-S-conjugate beta-lyase activity;kynurenine-glyoxylate transaminase activity;kynurenine-oxoglutarate transaminase activity;lyase activity;pyridoxal phosphate binding;transaminase activity;transferase activity;transferase activity, transferring nitrogenous groups;vitamin B6 binding;vitamin binding	cell part;cytoplasmic part;intracellular membrane-bounded organelle;intracellular organelle;intracellular part;membrane-bounded organelle;mitochondrion;organelle	Selenocompound metabolism;Tryptophan metabolism	1	0.00567245	77.562	77.562	-1.4306	135380000
Q71RI9;Q71RI9-2	427;392	Q71RI9	Kynurenine--oxoglutarate transaminase 3	Ccbl2	PVSAFCDSKSKPHFEKLVRFCFIKKDSTLDA	NaN		1.86844	1.58631	-0.282127	#DIV/0!		3	___1	2-oxoglutarate metabolic process;biosynthetic process;carboxylic acid metabolic process;cellular ketone metabolic process;cellular metabolic process;cellular process;dicarboxylic acid metabolic process;metabolic process;organic acid metabolic process;oxoacid metabolic process;small molecule metabolic process	binding;carbon-sulfur lyase activity;catalytic activity;cofactor binding;cysteine-S-conjugate beta-lyase activity;kynurenine-glyoxylate transaminase activity;kynurenine-oxoglutarate transaminase activity;lyase activity;pyridoxal phosphate binding;transaminase activity;transferase activity;transferase activity, transferring nitrogenous groups;vitamin B6 binding;vitamin binding	cell part;cytoplasmic part;intracellular membrane-bounded organelle;intracellular organelle;intracellular part;membrane-bounded organelle;mitochondrion;organelle	Selenocompound metabolism;Tryptophan metabolism	1	0.000301136	86.114	86.114	-0.81032	35562000
Q78PG9	23	Q78PG9	Coiled-coil domain-containing protein 25	Ccdc25	SSVNSSTYTIYMGKDKYENEDLIKYGWPEDI	NaN		-0.112571	-0.124423	-0.0118525	#DIV/0!		2	___1					1	0.000353538	85.958	85.958	0.15534	12758000
P80313	172	P80313	T-complex protein 1 subunit eta	Cct7	KCAMTALSSKLISQQKVFFAKMVVDAVMMLD	NaN		0.0119093	0.173746	0.161837	#DIV/0!		2	___1	binding of sperm to zona pellucida;cell recognition;cell-cell recognition;cellular macromolecule metabolic process;cellular metabolic process;cellular process;cellular process involved in reproduction;cellular protein metabolic process;macromolecule metabolic process;metabolic process;primary metabolic process;protein folding;protein metabolic process;reproductive process;sperm-egg recognition	adenyl nucleotide binding;adenyl ribonucleotide binding;ATP binding;binding;nucleotide binding;purine nucleotide binding;purine ribonucleoside triphosphate binding;purine ribonucleotide binding;ribonucleotide binding	cell part;chaperonin-containing T-complex;cytoplasmic part;cytoskeletal part;cytosolic part;intracellular membrane-bounded organelle;intracellular organelle;intracellular organelle part;intracellular part;macromolecular complex;membrane-bounded organelle;microtubule;mitochondrion;organelle;organelle part;protein complex		1	0.000760805	81.865	81.865	-1.1579	12703000
P42932	466	P42932	T-complex protein 1 subunit theta	Cct8	ALAENSGVKANEVISKLYSVHQEGNKNVGLD	NaN		-0.0467583	0.121754	0.168512	#DIV/0!		3	___1	binding of sperm to zona pellucida;cell recognition;cell-cell recognition;cellular macromolecule metabolic process;cellular metabolic process;cellular process;cellular process involved in reproduction;cellular protein metabolic process;macromolecule metabolic process;metabolic process;primary metabolic process;protein folding;protein metabolic process;reproductive process;sperm-egg recognition	adenyl nucleotide binding;adenyl ribonucleotide binding;ATP binding;binding;nucleotide binding;purine nucleotide binding;purine ribonucleoside triphosphate binding;purine ribonucleotide binding;ribonucleotide binding	aggresome;cell part;centrosome;chaperonin-containing T-complex;cytoplasmic part;cytoskeletal part;cytoskeleton;cytosolic part;inclusion body;intermediate filament cytoskeleton;intracellular non-membrane-bounded organelle;intracellular organelle;intracellular organelle part;intracellular part;macromolecular complex;microtubule;microtubule organizing center;non-membrane-bounded organelle;organelle;…		1	0.00724876	75.97	75.97	0.94587	12430000
Q8QZR3;E9Q3D0	372;339	Q8QZR3		Ces2a;Ces2a	HIIKNITRETLPAVLKNTAARMMLPPECSHL	NaN		-1.41361	-1.45552	-0.0419074	#DIV/0!		2	___1	carbohydrate metabolic process;cellular carbohydrate metabolic process;cellular macromolecule metabolic process;cellular metabolic process;cellular process;cellular protein metabolic process;glycosylation;macromolecule glycosylation;macromolecule metabolic process;macromolecule modification;metabolic process;primary metabolic process;protein glycosylation;protein metabolic process;protein modific…	carboxylesterase activity;carboxylic ester hydrolase activity;catalytic activity;hydrolase activity;hydrolase activity, acting on ester bonds			1	0.0142861	75.669	75.669	0.78739	14375000
Q91WG0	552	Q91WG0		Ces2c	LQFWTKTLPQKIQELKASQDKHREL______	NaN		-0.810411	-1.43349	-0.623078	#DIV/0!		2	___1	response to acid;response to chemical stimulus;response to stimulus	acylcarnitine hydrolase activity;carboxylesterase activity;carboxylic ester hydrolase activity;catalytic activity;hydrolase activity;hydrolase activity, acting on ester bonds	cell part;intracellular membrane-bounded organelle;intracellular organelle;intracellular part;membrane-bounded organelle;organelle		1	0.000449424	83.869	83.499	-0.56704	2653400000
Q91WS0	55	Q91WS0	CDGSH iron-sulfur domain-containing protein 1	Cisd1	RTKAMVNLQIQKDNPKVVHAFDMEDLGDKAV	NaN		0.0950327	-0.109445	-0.204477	#DIV/0!		2	___1	biological regulation;regulation of biological process;regulation of cellular metabolic process;regulation of cellular process;regulation of cellular respiration;regulation of generation of precursor metabolites and energy;regulation of metabolic process	2 iron, 2 sulfur cluster binding;binding;cation binding;ion binding;iron ion binding;iron-sulfur cluster binding;metal cluster binding;metal ion binding;transition metal ion binding	cell part;cytoplasmic part;integral to membrane;intracellular organelle part;intracellular part;intrinsic to membrane;membrane;membrane part;mitochondrial membrane;mitochondrial outer membrane;mitochondrial part;organelle membrane;organelle outer membrane;organelle part;outer membrane		1	4.37e-20	139.69	139.69	1.7406	33678000
Q5SXR6;Q68FD5	641;637	Q5SXR6	Clathrin heavy chain 1	Cltc;Cltc	LLQRALEHFTDLYDIKRAVVHTHLLNPEWLV	NaN		0.0423116	0.0381174	-0.00419421	#DIV/0!		3	___1	cation transport;cell cycle process;cellular component assembly;cellular component assembly at cellular level;cellular component organization;cellular component organization at cellular level;cellular component organization or biogenesis;cellular component organization or biogenesis at cellular level;cellular macromolecule metabolic process;cellular membrane organization;cellular metabolic proces…	structural molecule activity	cell part;chromosomal part;clathrin coat;clathrin coat of coated pit;clathrin coat of trans-Golgi network vesicle;clathrin vesicle coat;cytoplasmic membrane-bounded vesicle;cytoplasmic part;cytoplasmic vesicle;cytoplasmic vesicle part;cytoskeletal part;Golgi apparatus part;intracellular membrane-bounded organelle;intracellular non-membrane-bounded organelle;intracellular organelle;intracellular o…	Bacterial invasion of epithelial cells;Endocrine and other factor-regulated calcium reabsorption;Endocytosis;Huntington's disease;Lysosome	1	3.57e-06	103.14	103.14	-0.55192	90469000
E9Q434;F6Z1R4;Q5SXR6;Q68FD5	78;35;1505;1501	E9Q434;Q5SXR6	Clathrin heavy chain 1	Cltc;Cltc;Cltc;Cltc	AYDNFDNISLAQRLEKHELIEFRRIAAYLFK	NaN		0.0423116	0.0381174	-0.00419421	#DIV/0!		3	___1	cation transport;cell cycle process;cellular component assembly;cellular component assembly at cellular level;cellular component organization;cellular component organization at cellular level;cellular component organization or biogenesis;cellular component organization or biogenesis at cellular level;cellular macromolecule metabolic process;cellular membrane organization;cellular metabolic proces…	structural molecule activity	cell part;chromosomal part;clathrin coat;clathrin coat of coated pit;clathrin coat of trans-Golgi network vesicle;clathrin vesicle coat;cytoplasmic membrane-bounded vesicle;cytoplasmic part;cytoplasmic vesicle;cytoplasmic vesicle part;cytoskeletal part;Golgi apparatus part;intracellular membrane-bounded organelle;intracellular non-membrane-bounded organelle;intracellular organelle;intracellular o…	Bacterial invasion of epithelial cells;Endocrine and other factor-regulated calcium reabsorption;Endocytosis;Huntington's disease;Lysosome	1	0.000352367	98.353	84.605	0.061565	20323000
Q8R4N0;E9PYU7	307;112	Q8R4N0	Citrate lyase subunit beta-like protein, mitochondrial	Clybl;Clybl	AEELIAAFKEHQQLGKGAFTFRGSMIDMPLL	NaN		0.293092	-0.348382	-0.641474	#DIV/0!		3	___1	cellular aromatic compound metabolic process;cellular metabolic process;cellular process;metabolic process	binding;carbon-carbon lyase activity;catalytic activity;cation binding;citrate (pro-3S)-lyase activity;ion binding;lyase activity;metal ion binding;oxo-acid-lyase activity	cell part;citrate lyase complex;cytoplasmic part;intracellular membrane-bounded organelle;intracellular organelle;intracellular part;macromolecular complex;membrane-bounded organelle;mitochondrion;organelle;protein complex		1	8.75e-06	87.863	87.863	0.95344	16340000
Q9DBP5	43	Q9DBP5	UMP-CMP kinase	Cmpk1	GYTHLSAGELLRDERKNPDSQYGELIEKYIK	NaN		0.361077	0.0023819	-0.358695	#DIV/0!		2	___1	2'-deoxyribonucleotide biosynthetic process;2'-deoxyribonucleotide metabolic process;benzene-containing compound metabolic process;biosynthetic process;carboxylic acid metabolic process;CDP biosynthetic process;CDP metabolic process;cellular aromatic compound metabolic process;cellular biosynthetic process;cellular ketone metabolic process;cellular metabolic process;cellular nitrogen compound bio…	adenyl nucleotide binding;adenyl ribonucleotide binding;ATP binding;binding;catalytic activity;cytidylate kinase activity;kinase activity;nucleobase-containing compound kinase activity;nucleotide binding;nucleotide kinase activity;phosphotransferase activity, phosphate group as acceptor;purine nucleotide binding;purine ribonucleoside triphosphate binding;purine ribonucleotide binding;ribonucleoti…	cell part;cytoplasm;intracellular membrane-bounded organelle;intracellular organelle;intracellular part;membrane-bounded organelle;nucleus;organelle	Pyrimidine metabolism	1	5.7e-06	94.09	94.09	-0.33167	18578000
Q9DAW9	156	Q9DAW9	Calponin-3	Cnn3	GVKYAEKQTRRFDEGKLKAGQSVIGLQMGTN	NaN		-0.0105068	0.0202158	0.0307226	#DIV/0!		2	___1	actin cytoskeleton organization;actin filament-based process;actomyosin structure organization;biological regulation;cellular component organization;cellular component organization at cellular level;cellular component organization or biogenesis;cellular component organization or biogenesis at cellular level;cellular process;cytoskeleton organization;negative regulation of ATPase activity;negative…		cell body;cell part;cytoskeletal part;intracellular organelle part;intracellular part;neuronal cell body;organelle part;postsynaptic density;synapse part		1	0.0108805	76.478	76.478	-0.1536	41145000
P16330;P16330-2	196;176	P16330	2',3'-cyclic-nucleotide 3'-phosphodiesterase	Cnp	EKDFLPLYFGWFLTKKSSETLRKAGQVFLEE	NaN		-0.25817	-0.429293	-0.171123	#DIV/0!		2	___1	adult behavior;adult locomotory behavior;aging;anatomical structure development;anatomical structure morphogenesis;axonogenesis;behavior;biological regulation;catabolic process;cell part morphogenesis;cell projection morphogenesis;cell projection organization;cellular catabolic process;cellular component morphogenesis;cellular component organization;cellular component organization at cellular lev…	2',3'-cyclic-nucleotide 3'-phosphodiesterase activity;binding;catalytic activity;cyclic nucleotide binding;cyclic-nucleotide phosphodiesterase activity;hydrolase activity;hydrolase activity, acting on ester bonds;nucleic acid binding;nucleotide binding;phosphoric diester hydrolase activity;phosphoric ester hydrolase activity;RNA binding	cell part;cell projection;cytoplasmic membrane-bounded vesicle;cytoplasmic part;cytoplasmic vesicle;cytoskeletal part;extracellular region part;extracellular space;intracellular membrane-bounded organelle;intracellular organelle;intracellular organelle part;intracellular part;macromolecular complex;melanosome;membrane;membrane-bounded organelle;membrane-bounded vesicle;microtubule;microvillus;mit…		1	0.0852211	75.738	75.738	-0.43819	12643000
Q8CIE6;F8WHL2	46;46	Q8CIE6	Coatomer subunit alpha;Xenin;Proxenin	Copa;Copa	GVIQLWDYRMCTLIDKFDEHDGPVRGIDFHK	NaN		-0.16605	-0.0919905	0.0740595	#DIV/0!		3	___1	biological regulation;body fluid secretion;cellular process;digestive system process;establishment of localization;establishment of localization in cell;establishment of protein localization;intracellular protein transport;intracellular transport;multicellular organismal process;pancreatic juice secretion;protein transport;regulation of biological quality;regulation of body fluid levels;secretion…	structural molecule activity	cell part;COPI vesicle coat;cytoplasmic part;cytoplasmic vesicle part;extracellular region part;extracellular space;Golgi apparatus part;intracellular organelle part;intracellular part;macromolecular complex;membrane coat;membrane part;organelle part;protein complex;vesicle coat	Neuroactive ligand-receptor interaction	1	2.73e-05	82.102	82.102	-0.25571	7884900
Q8K1Z0;F6SFF5	161;159	Q8K1Z0	Ubiquinone biosynthesis protein COQ9, mitochondrial	Coq9;Coq9	TQCNARLNQVLEEEQKLVQLGQAEKRKTDQF	NaN		0.554486	-0.0258577	-0.580344	#DIV/0!		3	___1	biosynthetic process;cellular biosynthetic process;cellular ketone metabolic process;cellular metabolic process;cellular process;coenzyme biosynthetic process;coenzyme metabolic process;cofactor biosynthetic process;cofactor metabolic process;metabolic process;oxidoreduction coenzyme metabolic process;quinone cofactor biosynthetic process;quinone cofactor metabolic process;small molecule metaboli…		cell part;cytoplasmic part;intracellular membrane-bounded organelle;intracellular organelle;intracellular part;membrane-bounded organelle;mitochondrion;organelle		1	1.02e-13	108.14	108.14	1.1514	11078000
Q8K1Z0;F6SFF5	172;170	Q8K1Z0	Ubiquinone biosynthesis protein COQ9, mitochondrial	Coq9;Coq9	EEEQKLVQLGQAEKRKTDQFLRDAVETRLRM	NaN		0.554486	-0.0258577	-0.580344	#DIV/0!		2	___1	biosynthetic process;cellular biosynthetic process;cellular ketone metabolic process;cellular metabolic process;cellular process;coenzyme biosynthetic process;coenzyme metabolic process;cofactor biosynthetic process;cofactor metabolic process;metabolic process;oxidoreduction coenzyme metabolic process;quinone cofactor biosynthetic process;quinone cofactor metabolic process;small molecule metaboli…		cell part;cytoplasmic part;intracellular membrane-bounded organelle;intracellular organelle;intracellular part;membrane-bounded organelle;mitochondrion;organelle		1	0.00723604	84.213	84.213	-1.3239	26326000
P19783	78	P19783	Cytochrome c oxidase subunit 4 isoform 1, mitochondrial	Cox4i1	KEKEKADWSSLSRDEKVQLYRIQFNESFAEM	NaN		0.0775547	-0.0385827	-0.116137	#DIV/0!		2	___1		catalytic activity;cation transmembrane transporter activity;cytochrome-c oxidase activity;heme-copper terminal oxidase activity;hydrogen ion transmembrane transporter activity;inorganic cation transmembrane transporter activity;ion transmembrane transporter activity;monovalent inorganic cation transmembrane transporter activity;oxidoreductase activity;oxidoreductase activity, acting on a heme gr…	cell part;cytoplasmic part;intracellular organelle part;intracellular part;membrane;mitochondrial inner membrane;mitochondrial membrane;mitochondrial part;organelle inner membrane;organelle membrane;organelle part	Alzheimer's disease;Cardiac muscle contraction;Huntington's disease;Oxidative phosphorylation;Parkinson's disease	1	0.00600023	89.698	89.698	-0.77671	5717500
Q9D881;E9PWM0;P19536	121;120;120	Q9D881	Cytochrome c oxidase subunit 5B, mitochondrial	Cox5b;Cox5b;Cox5b	HKGESQRCPNCGTHYKLVPHQMAH_______	NaN		0.111924	0.000309888	-0.111614	#DIV/0!		4	___1		binding;catalytic activity;cation binding;cation transmembrane transporter activity;cytochrome-c oxidase activity;heme-copper terminal oxidase activity;hydrogen ion transmembrane transporter activity;inorganic cation transmembrane transporter activity;ion binding;ion transmembrane transporter activity;metal ion binding;monovalent inorganic cation transmembrane transporter activity;oxidoreductase …	cell part;cytoplasmic part;envelope;intracellular organelle part;intracellular part;membrane;mitochondrial envelope;mitochondrial inner membrane;mitochondrial membrane;mitochondrial part;organelle envelope;organelle inner membrane;organelle membrane;organelle part	Alzheimer's disease;Cardiac muscle contraction;Huntington's disease;Oxidative phosphorylation;Parkinson's disease	1	4.11e-23	130.87	130.87	-0.15648	28136000
Q8C196	210	Q8C196	Carbamoyl-phosphate synthase [ammonia], mitochondrial	Cps1	PNKQNLIAEVSTKDVKVFGKGNPTKVVAVDC	NaN		-0.331595	-0.520858	-0.189263	#DIV/0!		2	___1	acylglycerol catabolic process;acylglycerol metabolic process;amide biosynthetic process;amine catabolic process;amine metabolic process;anatomical structure development;anion homeostasis;biological regulation;biosynthetic process;carbamoyl phosphate biosynthetic process;carbamoyl phosphate metabolic process;carbohydrate catabolic process;carbohydrate metabolic process;carboxylic acid catabolic p…	adenyl nucleotide binding;adenyl ribonucleotide binding;amine binding;amino acid binding;ATP binding;binding;calcium ion binding;carbamoyl-phosphate synthase (ammonia) activity;carboxylic acid binding;catalytic activity;cation binding;endopeptidase activity;glutamate binding;hydrolase activity;ion binding;ligase activity;ligase activity, forming carbon-nitrogen bonds;lipid binding;metal ion bindi…	cell part;cytoplasmic part;intracellular membrane-bounded organelle;intracellular non-membrane-bounded organelle;intracellular organelle;intracellular organelle part;intracellular part;macromolecular complex;membrane;membrane-bounded organelle;mitochondrial inner membrane;mitochondrial membrane;mitochondrial nucleoid;mitochondrial part;mitochondrion;non-membrane-bounded organelle;nuclear part;nuc…	Alanine, aspartate and glutamate metabolism;Arginine and proline metabolism;Nitrogen metabolism	1	0.0792039	83.753	83.753	-0.46051	56533000
Q8C196	399	Q8C196	Carbamoyl-phosphate synthase [ammonia], mitochondrial	Cps1	PTDTEYLFDSFFSLIKKGKGTTITSVLPKPA	NaN		-0.331595	-0.520858	-0.189263	#DIV/0!		4	___1	acylglycerol catabolic process;acylglycerol metabolic process;amide biosynthetic process;amine catabolic process;amine metabolic process;anatomical structure development;anion homeostasis;biological regulation;biosynthetic process;carbamoyl phosphate biosynthetic process;carbamoyl phosphate metabolic process;carbohydrate catabolic process;carbohydrate metabolic process;carboxylic acid catabolic p…	adenyl nucleotide binding;adenyl ribonucleotide binding;amine binding;amino acid binding;ATP binding;binding;calcium ion binding;carbamoyl-phosphate synthase (ammonia) activity;carboxylic acid binding;catalytic activity;cation binding;endopeptidase activity;glutamate binding;hydrolase activity;ion binding;ligase activity;ligase activity, forming carbon-nitrogen bonds;lipid binding;metal ion bindi…	cell part;cytoplasmic part;intracellular membrane-bounded organelle;intracellular non-membrane-bounded organelle;intracellular organelle;intracellular organelle part;intracellular part;macromolecular complex;membrane;membrane-bounded organelle;mitochondrial inner membrane;mitochondrial membrane;mitochondrial nucleoid;mitochondrial part;mitochondrion;non-membrane-bounded organelle;nuclear part;nuc…	Alanine, aspartate and glutamate metabolism;Arginine and proline metabolism;Nitrogen metabolism	1	0	306.52	118.57	0.36371	1628400000
P97742	344	P97742	Carnitine O-palmitoyltransferase 1, liver isoform	Cpt1a	KDSRHIVVYHRGRYFKVWLYHDGRLLRPREL	NaN		0.0839921	0.287045	0.203052	#DIV/0!		3	___1	acylglycerol metabolic process;alcohol metabolic process;amine metabolic process;behavior;betaine metabolic process;biological regulation;carbohydrate metabolic process;carboxylic acid catabolic process;carboxylic acid metabolic process;carnitine metabolic process;catabolic process;cellular amine metabolic process;cellular amino acid metabolic process;cellular carbohydrate metabolic process;cellu…	carnitine O-acyltransferase activity;carnitine O-palmitoyltransferase activity;catalytic activity;O-acyltransferase activity;O-palmitoyltransferase activity;palmitoyltransferase activity;transferase activity;transferase activity, transferring acyl groups;transferase activity, transferring acyl groups other than amino-acyl groups	cell part;cytoplasmic part;integral to membrane;integral to mitochondrial membrane;integral to mitochondrial outer membrane;integral to organelle membrane;intracellular organelle part;intracellular part;intrinsic to membrane;intrinsic to mitochondrial outer membrane;intrinsic to organelle membrane;membrane;membrane part;mitochondrial inner membrane;mitochondrial membrane;mitochondrial membrane pa…	Adipocytokine signaling pathway;Fatty acid metabolism;PPAR signaling pathway	1	0.000820202	91.858	91.858	-0.13662	40521000
P52825	418	P52825	Carnitine O-palmitoyltransferase 2, mitochondrial	Cpt2	PAATDSSVSVQKLSFKLSSALKAGVTAAKEK	NaN		0.567398	-0.109099	-0.676497	#DIV/0!		2	___1	carboxylic acid metabolic process;cellular ketone metabolic process;cellular lipid metabolic process;cellular metabolic process;cellular process;establishment of localization;fatty acid metabolic process;lipid metabolic process;metabolic process;monocarboxylic acid metabolic process;organic acid metabolic process;oxoacid metabolic process;primary metabolic process;small molecule metabolic process…	carnitine O-acyltransferase activity;carnitine O-palmitoyltransferase activity;catalytic activity;O-acyltransferase activity;O-palmitoyltransferase activity;palmitoyltransferase activity;transferase activity;transferase activity, transferring acyl groups;transferase activity, transferring acyl groups other than amino-acyl groups	cell part;cytoplasmic part;intracellular membrane-bounded organelle;intracellular non-membrane-bounded organelle;intracellular organelle;intracellular organelle part;intracellular part;membrane;membrane-bounded organelle;mitochondrial inner membrane;mitochondrial membrane;mitochondrial part;mitochondrion;non-membrane-bounded organelle;nuclear part;nucleolus;organelle;organelle inner membrane;orga…	Fatty acid metabolism;PPAR signaling pathway	1	0.00022156	108.9	108.9	1.7432	63531000
P47934	315	P47934	Carnitine O-acetyltransferase	Crat	YRNHVAGQMLHGGGSKFNSGNRWFDKTLQFI	NaN		1.11726	0.683639	-0.433624	#DIV/0!		3	___1	amine metabolic process;betaine metabolic process;carboxylic acid metabolic process;carnitine metabolic process;carnitine metabolic process, CoA-linked;cellular amine metabolic process;cellular amino acid metabolic process;cellular ketone metabolic process;cellular lipid metabolic process;cellular metabolic process;cellular nitrogen compound metabolic process;cellular process;establishment of loc…	acetyltransferase activity;carnitine O-acetyltransferase activity;carnitine O-acyltransferase activity;catalytic activity;O-acetyltransferase activity;O-acyltransferase activity;transferase activity;transferase activity, transferring acyl groups;transferase activity, transferring acyl groups other than amino-acyl groups	cell part;cytoplasmic part;endoplasmic reticulum;intracellular membrane-bounded organelle;intracellular organelle;intracellular organelle part;intracellular part;membrane;membrane-bounded organelle;microbody;mitochondrial inner membrane;mitochondrial membrane;mitochondrial part;mitochondrion;organelle;organelle inner membrane;organelle membrane;organelle part;peroxisome	Peroxisome	1	1.54e-09	96.379	96.379	1.6012	11146000
P47934;F7BF80	609;184	P47934	Carnitine O-acetyltransferase	Crat;Crat	SCAETNAARMAHYLEKALLDMRTLLQNHPRA	NaN		1.11726	0.683639	-0.433624	#DIV/0!		3	___1	amine metabolic process;betaine metabolic process;carboxylic acid metabolic process;carnitine metabolic process;carnitine metabolic process, CoA-linked;cellular amine metabolic process;cellular amino acid metabolic process;cellular ketone metabolic process;cellular lipid metabolic process;cellular metabolic process;cellular nitrogen compound metabolic process;cellular process;establishment of loc…	acetyltransferase activity;carnitine O-acetyltransferase activity;carnitine O-acyltransferase activity;catalytic activity;O-acetyltransferase activity;O-acyltransferase activity;transferase activity;transferase activity, transferring acyl groups;transferase activity, transferring acyl groups other than amino-acyl groups	cell part;cytoplasmic part;endoplasmic reticulum;intracellular membrane-bounded organelle;intracellular organelle;intracellular organelle part;intracellular part;membrane;membrane-bounded organelle;microbody;mitochondrial inner membrane;mitochondrial membrane;mitochondrial part;mitochondrion;organelle;organelle inner membrane;organelle membrane;organelle part;peroxisome	Peroxisome	1	2.08e-07	125.61	125.61	-1.4686	135660000
Q9DC50	69	Q9DC50	Peroxisomal carnitine O-octanoyltransferase	Crot	IVQKFQEGAGKRLHQKLLERARGKRNWLEEW	NaN		0.412075	0.810425	0.39835	#DIV/0!		3	___1	carboxylic acid catabolic process;carboxylic acid metabolic process;carboxylic acid transport;catabolic process;cellular catabolic process;cellular ketone metabolic process;cellular lipid catabolic process;cellular lipid metabolic process;cellular metabolic process;cellular process;establishment of localization;fatty acid beta-oxidation;fatty acid catabolic process;fatty acid metabolic process;fa…	carnitine O-acyltransferase activity;carnitine O-octanoyltransferase activity;catalytic activity;O-acyltransferase activity;octanoyltransferase activity;O-octanoyltransferase activity;transferase activity;transferase activity, transferring acyl groups;transferase activity, transferring acyl groups other than amino-acyl groups	cell part;cytoplasmic part;intracellular membrane-bounded organelle;intracellular organelle;intracellular part;membrane-bounded organelle;microbody;mitochondrion;organelle;peroxisome	Peroxisome	1	0.000894512	104.05	104.05	-0.29156	28790000
Q9DC50	57	Q9DC50	Peroxisomal carnitine O-octanoyltransferase	Crot	FANEDEYKKTEEIVQKFQEGAGKRLHQKLLE	NaN		0.412075	0.810425	0.39835	#DIV/0!		2	___1	carboxylic acid catabolic process;carboxylic acid metabolic process;carboxylic acid transport;catabolic process;cellular catabolic process;cellular ketone metabolic process;cellular lipid catabolic process;cellular lipid metabolic process;cellular metabolic process;cellular process;establishment of localization;fatty acid beta-oxidation;fatty acid catabolic process;fatty acid metabolic process;fa…	carnitine O-acyltransferase activity;carnitine O-octanoyltransferase activity;catalytic activity;O-acyltransferase activity;octanoyltransferase activity;O-octanoyltransferase activity;transferase activity;transferase activity, transferring acyl groups;transferase activity, transferring acyl groups other than amino-acyl groups	cell part;cytoplasmic part;intracellular membrane-bounded organelle;intracellular organelle;intracellular part;membrane-bounded organelle;microbody;mitochondrion;organelle;peroxisome	Peroxisome	1	2.16e-10	121.76	121.76	-0.074146	16448000
[truncated: 1,272 more rows]

## Sheet: Table 3 - DbDb Proteome
Protein IDs	Protein names	Gene names	Significant	log2 Ratio DdDb/Control	GOBP name	GOMF name	GOCC name	KEGG name	Pfam	PEP	Intensity	-log 10 p value
[truncated: 8,653 more rows]
